# Supplementary material
Source: PubMed Central journal article supplement (PMC3278049)
Supplement: 112301_supp.pdf [file 112301_supp.pdf]

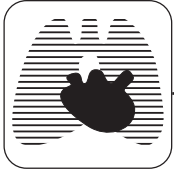

### **Antithrombotic Therapy for VTE Disease**

#### **Antithrombotic Therapy and Prevention of Thrombosis, 9th ed: American College of Chest Physicians Evidence-Based Clinical Practice Guidelines**

*Clive Kearon, MD, PhD; Elie A. Akl, MD, MPH, PhD; Anthony J. Comerota, MD;  
Paolo Prandoni, MD; Henri Bounameaux, MD; Samuel Z. Goldhaber, MD, FCCP;  
Michael Nelson, MD, FCCP; Philip Wells, MD; Michael K. Gould, MD, MS, FCCP;  
Francesco Dentali, MD; Mark Crowther, MD; and Susan R. Kahn, MD*

**Table S1—[Section 2.1] Evidence Profile: Parenteral Anticoagulation vs No Parenteral Anticoagulation in Acute VTE<sup>a</sup>**

| Participants (Studies), Follow-up | Quality Assessment                   |                          |                         |                      |                  | Summary of Findings                                                                                                               |                                    |                                 |                                         |                                                          |                                                 |
|-----------------------------------|--------------------------------------|--------------------------|-------------------------|----------------------|------------------|-----------------------------------------------------------------------------------------------------------------------------------|------------------------------------|---------------------------------|-----------------------------------------|----------------------------------------------------------|-------------------------------------------------|
|                                   | Risk of Bias                         | Inconsistency            | Indirectness            | Imprecision          | Publication Bias | Overall Quality of Evidence                                                                                                       | Study Event Rates (%)              |                                 | Anticipated Absolute Effects            |                                                          |                                                 |
|                                   |                                      |                          |                         |                      |                  |                                                                                                                                   | With No Parenteral Anticoagulation | With Parenteral Anticoagulation | Risk With No Parenteral Anticoagulation | Risk Difference With Parenteral Anticoagulation (95% CI) |                                                 |
| 120 (1 study), 6 mo               | No serious risk of bias <sup>b</sup> | No serious inconsistency | No serious indirectness | Serious <sup>c</sup> | Undetected       | Mortality (important outcome)<br>Moderate <sup>b,c</sup> due to imprecision                                                       | 2/60 (3.3)                         | 1/60 (1.7)                      | RR 0.5 (0.05-5.37)                      | 33 per 1,000                                             | 16 fewer per 1,000 (from 31 fewer to 144 more)  |
| 120 (1 study), 6 mo               | No serious risk of bias <sup>b</sup> | No serious inconsistency | No serious indirectness | Serious <sup>d</sup> | Undetected       | Recurrent VTE (critical outcome; assessed with symptomatic extension or recurrence)<br>Moderate <sup>b,d</sup> due to imprecision | 12/60 (20)                         | 4/60 (6.7)                      | RR 0.33 (0.11-0.98)                     | 200 per 1,000                                            | 134 fewer per 1,000 (from 4 fewer to 178 fewer) |
| 120 (1 study), 6 mo               | No serious risk of bias <sup>b</sup> | No serious inconsistency | No serious indirectness | Serious <sup>e</sup> | Undetected       | Major bleeding (critical outcome)<br>Moderate <sup>b,c</sup> due to imprecision                                                   | 3/60 (5)                           | 2/60 (3.3)                      | RR 0.67 (0.12-3.85)                     | 50 per 1,000                                             | 16 fewer per 1,000 (from 44 fewer to 142 more)  |

Bibliography: Brandjes et al.<sup>1</sup> RR = risk ratio.

<sup>a</sup>Both groups treated with acenocoumarol.

<sup>b</sup>Study described as double blinded; outcome adjudicators blinded. None of the study participants were lost to follow-up. Intention-to-treat analysis. Study was stopped early for benefit.

<sup>c</sup>CI includes values suggesting no effect as well as values suggesting either appreciable benefit or appreciable harm.

<sup>d</sup>Low number of events caused by the early stoppage of the trial.

**Table S2—[Section 2.4] Evidence Profile: Early Warfarin (and Shorter Duration Heparin) vs Delayed Warfarin (and Longer Duration Heparin) for Acute VTE<sup>a-d</sup>**

| Participants (Studies), Follow-up  | Quality Assessment                     |                          |                         |                                     | Summary of Findings |                                                                                             |                                                                |                                                               |                          |                                                                     |                                                                                        |
|------------------------------------|----------------------------------------|--------------------------|-------------------------|-------------------------------------|---------------------|---------------------------------------------------------------------------------------------|----------------------------------------------------------------|---------------------------------------------------------------|--------------------------|---------------------------------------------------------------------|----------------------------------------------------------------------------------------|
|                                    | Risk of Bias                           | Inconsistency            | Indirectness            | Imprecision                         | Publication Bias    | Overall Quality of Evidence                                                                 | With Delayed Warfarin Initiation (and Longer Duration Heparin) | With Early Warfarin Initiation (and Shorter Duration Heparin) | Relative Effect (95% CI) | Risk With Delayed Warfarin Initiation (and Longer Duration Heparin) | Risk Difference With Early Warfarin Initiation (and Shorter Duration Heparin) (95% CI) |
| 688 (3 studies), 3 mo <sup>f</sup> | No serious risk of bias <sup>g</sup>   | No serious inconsistency | No serious indirectness | Serious <sup>h</sup>                | Undetected          | Mortality (important outcome) <sup>e</sup><br>Moderate <sup>g,h</sup><br>due to imprecision | 13/338 (3.8)                                                   | 12/350 (3.4)                                                  | RR 0.9 (0.41-1.95)       | 24 per 1,000 <sup>i</sup>                                           | 2 fewer per 1,000 (from 14 fewer to 23 more)                                           |
|                                    | No serious risk of bias <sup>g</sup>   | No serious inconsistency | No serious indirectness | Serious <sup>h</sup>                | Undetected          | Recurrent VTE (critical outcome)<br>Moderate <sup>g,h</sup><br>due to imprecision           | 14/338 (4.1)                                                   | 12/350 (3.4)                                                  | RR 0.83 (0.4-1.74)       | 47 per 1,000 <sup>i</sup>                                           | 8 fewer per 1,000 (from 28 fewer to 35 more)                                           |
| 688 (3 studies), 3 mo <sup>f</sup> | No serious risk of bias <sup>g,h</sup> | No serious inconsistency | No serious indirectness | No serious imprecision <sup>i</sup> | Undetected          | Major bleeding (critical outcome)<br>High <sup>g,k,l</sup>                                  | 10/338 (3.0)                                                   | 15/350 (4.3)                                                  | RR 1.48 (0.68-3.23)      | 16 per 1,000 <sup>i</sup>                                           | 14 more per 1,000 (from 9 fewer to 66 more)                                            |
|                                    | No serious risk of bias <sup>g,h</sup> | No serious inconsistency | No serious indirectness | No serious imprecision <sup>i</sup> | Undetected          | Major bleeding (critical outcome)<br>High <sup>g,k,l</sup>                                  | 10/338 (3.0)                                                   | 15/350 (4.3)                                                  | RR 1.48 (0.68-3.23)      | 16 per 1,000 <sup>i</sup>                                           | 14 more per 1,000 (from 9 fewer to 66 more)                                            |

**Bibliography:** Gallus et al,<sup>2</sup> Hull et al,<sup>3</sup> Leroyer et al,<sup>4</sup> Excluded Mohiuddin et al<sup>5</sup> because 34% of subjects had mural thrombus rather than VTE, in addition to major methodologic limitations). LMWH = low-molecular-weight heparin; PE = pulmonary embolism; UFH = unfractionated heparin; VKA = vitamin K antagonist. See Table S1 legend for expansion of other abbreviation.

<sup>a</sup>VKA therapy started within 1 day of starting heparin therapy (UFH in two studies and LMWH in one study).  
<sup>b</sup>VKA therapy delayed for 4 to 10 d.

<sup>c</sup>Most patients had proximal DVT, some had isolated distal DVT; most DVT were symptomatic (asymptomatic DVT included in Hull et al), and few had PE (only included in Gallus et al).

<sup>d</sup>The early initiation of VKA was associated with a lower number of days of heparin therapy (4.1 vs 9.5 in Gallus et al; 5 vs 10 in Hull et al) and a lower number of days of hospital stay (9.1 vs 13.0 in Gallus; 11.7 vs 14.7 in Hull; 11.9 vs 16.0 in Leroyer et al).

<sup>e</sup>Differences in death, independently of differences in recurrent VTE and major bleeding, is unlikely.

<sup>f</sup>Outcome assessment was at hospital discharge in the study by Gallus et al (although there was also extended follow-up) and 3 mo in the studies by Hull et al and Leroyer et al.

<sup>g</sup>Patients and investigators were not blinded in two studies (Gallus et al and Leroyer et al) and were blinded in one study (Hull et al). Concealment was not clearly described but was probable in the three studies. Primary outcome appears to have been assessed after a shorter duration of follow-up in the shorter treatment arm of one study because of earlier discharge from the hospital, and 20% of subjects in this study were excluded from the final analysis postrandomization (Gallus).

<sup>h</sup>The 95% CI on relative effect includes both clinically important benefit and clinically important harm.

<sup>i</sup>Event rate corresponds to the median event rate in the included studies.

<sup>j</sup>Bleeding was assessed early (in hospital or in the first 10 d) in two studies (Gallus et al, Hull et al) and at 3 mo in one study (Leroyer et al).

<sup>k</sup>It is unclear whether bleeding was assessed at 10 d in all subjects or just while heparin was being administered, which could yield a biased estimate in favor of short-duration therapy in one study (Hull et al).

<sup>l</sup>Because the shorter duration of heparin therapy is very unlikely to increase bleeding, the wide 95% CIs around the relative effect of shorter therapy on risk of bleeding is not a major concern.

**Table S3—[Section 2.5.1] Evidence Profile: LMWH vs SC UFH for Initial Anticoagulation of Acute VTE**

| Participants (Studies), Follow-up | Quality Assessment                   |                          |                         |                      | Summary of Findings |                                            |                       |                          |                                                                        |
|-----------------------------------|--------------------------------------|--------------------------|-------------------------|----------------------|---------------------|--------------------------------------------|-----------------------|--------------------------|------------------------------------------------------------------------|
|                                   | Risk of Bias                         | Inconsistency            | Indirectness            | Imprecision          | Publication Bias    | Overall Quality of Evidence                | Study Event Rates (%) | Relative Effect (95% CI) | Anticipated Absolute Effects                                           |
| 1,566 (3 studies), 3 mo           | No serious risk of bias <sup>a</sup> | No serious inconsistency | No serious indirectness | Serious <sup>b</sup> | Undetected          | Moderate <sup>ab</sup> due to imprecision  | 31/780 (4)            | RR 1.1 (0.68-1.76)       | 33 per 1,000 <sup>c</sup> 3 more per 1,000 (from 11 fewer to 25 more)  |
|                                   | No serious risk of bias <sup>a</sup> | No serious inconsistency | No serious indirectness | Serious <sup>b</sup> | Undetected          | Moderate <sup>ab</sup> due to imprecision  | 31/777 (4)            | RR 0.87 (0.52-1.45)      | 42 per 1,000 <sup>c</sup> 5 fewer per 1,000 (from 20 fewer to 19 more) |
| 1,634 (4 studies), 3 mo           | No serious risk of bias <sup>a</sup> | No serious inconsistency | No serious indirectness | Serious <sup>b</sup> | Undetected          | Moderate <sup>b,c</sup> due to imprecision | 15/815 (1.8)          | RR 1.27 (0.56-2.9)       | 16 per 1,000 <sup>c</sup> 4 more per 1,000 (from 7 fewer to 30 more)   |
|                                   | No serious risk of bias <sup>a</sup> | No serious inconsistency | No serious indirectness | Serious <sup>b</sup> | Undetected          | Moderate <sup>b,c</sup> due to imprecision | 19/819 (2.3)          | RR 1.27 (0.56-2.9)       | 16 per 1,000 <sup>c</sup> 4 more per 1,000 (from 7 fewer to 30 more)   |

Bibliography: Lopaciuk et al,<sup>21</sup> Faivre et al,<sup>2</sup> Prandoni et al,<sup>23</sup> Kearon et al,<sup>24</sup> SC = subcutaneous. See Table S1 and S2 legends for expansion of other abbreviations.

<sup>a</sup>In the two largest trials (Prandoni et al and Kearon et al, 87% of patients), allocation was concealed, outcome adjudicators and data analysts were concealed, analysis was intention to treat, and there were no losses to follow-up.

<sup>b</sup>Precision judged from the perspective of whether SC heparin is noninferior to LMWH. The total number of events and the total number of participants are relatively low.

<sup>c</sup>Event rate corresponds to the median event rate in the included studies.

**Table S4—[Section 2.5.1] LMWH vs SC UFH for Initial Anticoagulation of Acute VTE: Clinical Description and Results**

| Author/Year (Acronym)                       | Interventions                                                                                                                                                                                                    | Patients Analyzed <sup>†</sup> | Recurrent DVT or PE            | Major Bleeding                 | Total Mortality                | Comments                                                                                                                                                                                                                                                                     |
|---------------------------------------------|------------------------------------------------------------------------------------------------------------------------------------------------------------------------------------------------------------------|--------------------------------|--------------------------------|--------------------------------|--------------------------------|------------------------------------------------------------------------------------------------------------------------------------------------------------------------------------------------------------------------------------------------------------------------------|
| Lopaciuk et al <sup>13/1992</sup>           | UFH 5,000 units IV followed by 250 units/kg SC bid initially and adjusted to aPTT for 10 d                                                                                                                       | 72/75                          | 1/72 (1.4%)                    | 1/72 (1.4%)                    | 3/72 (4.2%)                    | Population: Femoral DVT in 81% and popliteal or more distal DVT in 19%. Primary outcome was repeat venography.                                                                                                                                                               |
| Fairveet al <sup>22/1988</sup>              | Fraxiparine 97 International Units/kg SC bid for 10 d                                                                                                                                                            | 74/74                          | 0/74 RR 3.1 (0.1-7.5)          | 0/74RR 3.1 (0.1-7.5)           | 0/74RR 7.2 (0.4-137)           |                                                                                                                                                                                                                                                                              |
|                                             | UFH 5,000 units IV followed by 250 units/kg SC bid and adjusted to aPTT for 10 d                                                                                                                                 | 29/35                          | 1/35                           | 3/35                           | 1/35                           | Population: DVT (proportion of proximal and distal not reported). Primary outcome was repeat venography.                                                                                                                                                                     |
|                                             | CY222 2,000 International Units IV followed by 150 International Units/kg SC bid for 10 d                                                                                                                        | 30/33                          | 1/33 RR 0.9 (0.1-14.5)         | 0/33 RR 6.6 (0.3-123)          | 0/33 RR 2.8 (0.1-67)           |                                                                                                                                                                                                                                                                              |
| Prandoni et al <sup>23/2004</sup> (Galilei) | UFH IV (< 50 kg: 4,000 units; 50-70 kg: 5,000 units; > 70 kg: 6,000 units) followed by SC bid doses (initially < 50 kg: 12,500 units; 50-70 kg: 15,000 units; > 70 kg: 17,500 units) adjusted to aPTT for ~6.5 d | 360/360                        | 15/360 (4.2%)                  | 5/360 (1.4%)                   | 12/360 (3.3%)                  | Population: Proximal DVT in 65%, distal DVT in 18%, and PE in 17%.                                                                                                                                                                                                           |
|                                             | Nadroparin 85 International Units/kg SC bid for ~6.5 d                                                                                                                                                           | 360/360                        | 14/360 (3.9%) RR 1.1 (0.5-2.2) | 7/360 (1.9%) RR 0.7 (0.2-2.2)  | 12/360 (3.3%) RR 1.0 (0.5-2.2) |                                                                                                                                                                                                                                                                              |
| Keatron et al <sup>24/2006</sup> (FIDO)     | UFH 333 units/kg SC followed by 250 units/kg SC bid (no adjustment) for 6.3 d                                                                                                                                    | 345/355                        | 13/345 (3.8%)                  | 6/348 (1.7%)                   | 18/348 (5.2%)                  | Population: Proximal DVT in 77%, asymptomatic or distal DVT in 4%, and PE in 19%. Seventy percent of patients were treated entirely as an outpatient (76% of DVT and 39% of PE). Posttransdomization exclusions in 10 patients receiving UFH and one patient receiving LMWH. |
|                                             | Dalteparin (n = 261) or enoxaparin (n = 91) 100 International Units/kg SC bid for 7.1 d                                                                                                                          | 352/353                        | 12/352 (3.4%) RR 1.1 (0.5-2.3) | 12/352 (3.4%) RR 0.5 (0.2-1.3) | 22/352 (6.3%) RR 0.8 (0.4-1.5) |                                                                                                                                                                                                                                                                              |

aPTT = activated prothrombin time; FIDO = Fixed Dose Heparin. See Table S1 and S2 legends for expansion of other abbreviations.

<sup>†</sup>Follow-up was for 3 mo except for the study by Faivre et al<sup>22</sup> in which it was 10 d.

**Table S5—[Section 2.5.1] LMWH vs SC UFH for Initial Anticoagulation of Acute VTE: Methodologic Quality**

| Author/Year (Acronym)                        | Interventions                                                                                                                                                                                                                                                              | Study Design | Randomization |           | Blinding                                                                | Loss to Follow-up                                                                                                             | Analysis | Comments                                                                                                              |
|----------------------------------------------|----------------------------------------------------------------------------------------------------------------------------------------------------------------------------------------------------------------------------------------------------------------------------|--------------|---------------|-----------|-------------------------------------------------------------------------|-------------------------------------------------------------------------------------------------------------------------------|----------|-----------------------------------------------------------------------------------------------------------------------|
|                                              |                                                                                                                                                                                                                                                                            |              | Concealed     | Concealed |                                                                         |                                                                                                                               |          |                                                                                                                       |
| Lopaciuk et al <sup>21</sup> /1992           | UFH 5,000 units IV followed by 250 units/kg SC bid initially and adjusted to aPTT for 10 d<br>Fraxiparine 97 International units/kg SC bid for 10 d                                                                                                                        | RCT          | PY            |           | Patients: CN<br>Caregivers: CN<br>Adjudicators: CN<br>Data Analysts: PN | Not described                                                                                                                 | ITT      |                                                                                                                       |
| Faivre et al <sup>22</sup> /1988             | UFH 5,000 units IV followed by 250 units/kg SC bid and adjusted to aPTT for 10 d<br>CY222 2,000 International Units IV followed by 150 International Units/kg SC bid for 10 d                                                                                              | RCT          | PN            |           | Patients: PN<br>Caregivers: PN<br>Adjudicators: PN<br>Data Analysts: PN | Three of CY222 group and six of UFH group who did not have repeat venography are assumed to have completed clinical follow-up | ITT      |                                                                                                                       |
| Prandoni et al <sup>23</sup> /2004 (Galilei) | UFH IV (< 50 kg: 4,000 units; 50-70 kg: 5,000 units; > 70 kg: 6,000 units) followed by SC bid doses (initially < 50 kg: 12,500 units; 50-70 kg: 15,000 units; > 70 kg: 17,500 units) adjusted to aPTT for ~6.5 d<br>Nadroparin 85 International Units/kg SC bid for ~6.5 d | RCT          | CY            |           | Patients: CN<br>Caregivers: CN<br>Adjudicators: CY<br>Data Analysts: PY | Nil                                                                                                                           | ITT      |                                                                                                                       |
| Keaton et al <sup>24</sup> /2006 (FIDO)      | UFH 333 units/kg SC followed by 250 units/kg SC bid (no adjustment) for 6.3 d<br>Dalteparin (n = 261) or enoxaparin (n = 91) 100 International Units/kg SC bid for 7.1 d                                                                                                   | RCT          | CY            |           | Patients: CN<br>Caregivers: CN<br>Adjudicators: CY<br>Data Analysts: PY | Nil                                                                                                                           | ITT      | Postrandomization exclusions from the efficacy analysis were 10 (2.8%) for the UFH and one (0.2%) for the LMWH group. |

CN = certainly no; CY = certainly yes; ITT = intention to treat; PN = probably no; PY = probably yes; RCT = randomized controlled trial. See Table S1, S2, and S4 legends for expansion of other abbreviations.

**Table S6—[Section 2.5.1] Evidence Profile: LMWH vs IV UFH for Initial Anticoagulation of Acute VTE**

| Participants (Studies), Follow-up | Quality Assessment                    |                            |                            |                                        |                                                                                 | Summary of Findings                                                                             |                 |                       |                     |                                    |                                               |
|-----------------------------------|---------------------------------------|----------------------------|----------------------------|----------------------------------------|---------------------------------------------------------------------------------|-------------------------------------------------------------------------------------------------|-----------------|-----------------------|---------------------|------------------------------------|-----------------------------------------------|
|                                   | Risk of Bias                          | Inconsistency              | Indirectness               | Imprecision                            | Publication Bias                                                                | Overall Quality of Evidence                                                                     |                 | Study Event Rates (%) |                     | Anticipated Absolute Effects       |                                               |
|                                   |                                       |                            |                            |                                        |                                                                                 | Evidence                                                                                        | With IV UFH     | With LMWH             | Risk With IV UFH    | Risk Difference With LMWH (95% CI) | Relative Effect (95% CI)                      |
| 7,908 (17 studies), 3 mo          | Serious <sup>a</sup><br>inconsistency | No serious<br>indirectness | No serious<br>indirectness | No serious<br>imprecision              | Mortality (important outcome)<br>Reporting bias strongly suspected <sup>b</sup> | Low <sup>a,b</sup> due to risk of bias, publication bias                                        | 232/3,789 (6.1) | 187/4,119 (4.5)       | RR 0.79 (0.66-0.95) | 46 per 1,000 <sup>c</sup>          | 10 fewer per 1,000 (from 2 fewer to 16 fewer) |
| 7,976 (17 studies), 3 mo          | Serious <sup>a</sup><br>inconsistency | No serious<br>indirectness | No serious<br>indirectness | No serious<br>imprecision              | Reporting bias strongly suspected <sup>b</sup>                                  | Recurrent VTE (critical outcome)<br>Low <sup>a,b</sup> due to risk of bias, publication bias    | 208/3,869 (5.4) | 151/4,107 (3.7)       | RR 0.72 (0.58-0.89) | 55 per 1,000 <sup>c</sup>          | 15 fewer per 1,000 (from 6 fewer to 23 fewer) |
| 6,910 (20 studies), 3 mo          | Serious <sup>a</sup><br>inconsistency | No serious<br>indirectness | No serious<br>indirectness | No serious<br>imprecision <sup>d</sup> | Reporting bias strongly suspected <sup>b</sup>                                  | Major bleeding (critical outcome)<br>Low <sup>a,b,d</sup> due to risk of bias, publication bias | 69/3,517 (2)    | 41/3,393 (1.2)        | RR 0.67 (0.45-1)    | 15 per 1,000 <sup>c</sup>          | 5 fewer per 1,000 (from 8 fewer to 0 more)    |

Bibliography: van Dongen et al.<sup>6</sup> Included studies.<sup>7,20</sup> See Table S1 and S2 legends for expansion of abbreviations.

<sup>a</sup>Of the 20 trials, allocation was concealed in nine and was unclear whether concealed in the remaining 11. Eighteen trials had blinded outcome assessors. Seven trials did not have any postrandomization exclusions or losses to follow-up. Ten trials reported the number of participants lost to follow-up, which ranged from 1.0% to 12.7%. One trial did not report the drop-outs.

<sup>b</sup>Inverted funnel plot very suggestive of publication bias. Many of the included studies are of small size, and all are funded by industry.

<sup>c</sup>Event rate corresponds to the median event rate in the included studies.

<sup>d</sup>CI interval includes values suggesting significant benefit and no effect.

**Table S7—[Section 2.5.1] Evidence Profile: Fondaparinux vs LMWH for Initial Anticoagulation of Acute DVT<sup>a-c</sup>**

| Participants (Studies), Follow-up | Quality Assessment                   |                          |                         |                      |                  |                                                                                 |                             |                             |                          |                           | Summary of Findings                          |                                            |  |  |
|-----------------------------------|--------------------------------------|--------------------------|-------------------------|----------------------|------------------|---------------------------------------------------------------------------------|-----------------------------|-----------------------------|--------------------------|---------------------------|----------------------------------------------|--------------------------------------------|--|--|
|                                   | Risk of Bias                         | Inconsistency            | Indirectness            | Imprecision          | Publication Bias | Overall Quality of Evidence                                                     | Study Event Rates (%)       |                             | Relative Effect (95% CI) | Risk With LMWH            | Anticipated Absolute Effects                 | Risk Difference With Fondaparinux (95% CI) |  |  |
|                                   |                                      |                          |                         |                      |                  |                                                                                 | With LMWH                   | With Fondaparinux           |                          |                           |                                              |                                            |  |  |
| 2,205 (1 study), 3 mo             | No serious risk of bias <sup>d</sup> | No serious inconsistency | No serious indirectness | Serious <sup>e</sup> | Undetected       | Mortality (important outcome)<br>Moderate <sup>d,e</sup> due to imprecision     | 33/1,107 (3.0)              | 41/1,098 (3.7)              | RR 1.25 (0.8-1.97)       | 30 per 1,000              | 7 more per 1,000 (from 6 fewer to 29 more)   |                                            |  |  |
| 2,205 (1 study), 3 mo             | No serious risk of bias <sup>d</sup> | No serious inconsistency | No serious indirectness | Serious <sup>e</sup> | Undetected       | Recurrent VTE (critical outcome)<br>Moderate <sup>d,e</sup> due to imprecision  | 45/1,107 (4.1) <sup>f</sup> | 43/1,098 (3.9) <sup>f</sup> | RR 0.96 (0.64-1.45)      | 41 per 1,000 <sup>f</sup> | 2 fewer per 1,000 (from 15 fewer to 18 more) |                                            |  |  |
| 2,205 (1 study), 3 mo             | No serious risk of bias <sup>d</sup> | No serious inconsistency | No serious indirectness | Serious <sup>e</sup> | Undetected       | Major bleeding (critical outcome)<br>Moderate <sup>d,e</sup> due to imprecision | 13/1,107 (1.2) <sup>g</sup> | 12/1,098 (1.1) <sup>g</sup> | RR 0.93 (0.43-2.03)      | 12 per 1,000 <sup>g</sup> | 1 fewer per 1,000 (from 7 fewer to 12 more)  |                                            |  |  |

Bibliography: Büller et al.<sup>25</sup> INR = international normalized ratio. See Table S1 and S2 legends for expansion of other abbreviations.

<sup>a</sup>Fondaparinux 7.5 mg (5.0 mg in patients weighing < 50 kg and 10.0 mg in patients weighing > 100 kg) SC once daily for at least 5 d and until VKAs induced an INR > 2.0.

Enoxaparin 1 mg/kg of body weight SC bid for at least 5 d and until VKAs induced an INR > 2.0.

<sup>c</sup>All patients had acute symptomatic DVT.

<sup>d</sup>Allocation was concealed. Patients, providers, data collectors, and outcome adjudicators were blinded. Analysis excluded 0.6% of randomized patients. Not stopped early for benefit.

<sup>e</sup>CI includes values suggesting no effect and values suggesting either benefit or harm; relatively low number of events.

<sup>f</sup>Five fatal VTE in fondaparinux group and five fatal VTE in LMWH group.

<sup>g</sup>Twelve patients in the fondaparinux group and 13 in the LMWH group had a major bleeding during the initial period (7 d). Of these, two in the fondaparinux group and none in the LMWH group were fatal.



**Table S8—[Section 2.5.2] Evidence Profile: LMWH Once vs Twice Daily for Initial Anticoagulation of Acute VTE<sup>a,b</sup>**

| Participants (Studies), Follow-up | Quality Assessment                   |                          |                         |                      |                  | Summary of Findings                                    |                       |                              |                                         |               |
|-----------------------------------|--------------------------------------|--------------------------|-------------------------|----------------------|------------------|--------------------------------------------------------|-----------------------|------------------------------|-----------------------------------------|---------------|
|                                   | Risk of Bias                         | Inconsistency            | Indirectness            | Imprecision          | Publication Bias | Overall Quality of Evidence                            | Study Event Rates (%) | Anticipated Absolute Effects | Risk Difference With LMWH Once (95% CI) |               |
| 1,261 (3 studies), 3 mo           | No serious risk of bias <sup>c</sup> | Serious <sup>d</sup>     | No serious indirectness | Serious <sup>e</sup> | Undetected       | Mortality (important outcome)                          | With Bid              | With LMWH Once               | Relative Effect (95% CI)                | Risk With Bid |
|                                   |                                      |                          |                         |                      |                  | Low <sup>e,e</sup> due to inconsistency, imprecision   |                       |                              |                                         |               |
| 1,261 (3 studies), 3 mo           | No serious risk of bias <sup>c</sup> | Serious <sup>f</sup>     | No serious indirectness | Serious <sup>e</sup> | Undetected       | Recurrent VTE (critical outcome)                       | With Bid              | With LMWH Once               | Relative Effect (95% CI)                | Risk With Bid |
|                                   |                                      |                          |                         |                      |                  | Low <sup>e,e,f</sup> due to inconsistency, imprecision |                       |                              |                                         |               |
| 1,522 (5 studies), 10 d           | No serious risk of bias <sup>c</sup> | No serious inconsistency | No serious indirectness | Serious <sup>e</sup> | Undetected       | Major bleeding (critical outcome)                      | With Bid              | With LMWH Once               | Relative Effect (95% CI)                | Risk With Bid |
|                                   |                                      |                          |                         |                      |                  | Moderate <sup>e,e</sup> due to imprecision             |                       |                              |                                         |               |

Bibliography: van Dongen et al.<sup>26</sup> See Table S1, S2, and S5 legends for expansion of other abbreviations.

<sup>a</sup>The five included studies used four brands of LMWH (enoxaparin, tinzaparin, dalteparin, and nadroparin). In Merli et al, enoxaparin 1 mg/kg bid was compared with 1.5 mg/kg once daily. Holmström<sup>27</sup> et al adjusted the dose to anti-Xa levels, which resulted in different daily doses after a number of days. In the remaining studies, the dose of the once-daily administration was double the dose of the twice-daily administration (=equal total daily dose).

<sup>b</sup>Of the five included studies, one included patients with PE and DVT, and four included only patients with DVT. All studies addressed the initial management of VTE.

<sup>c</sup>All included studies concealed allocation. Two studies had a double-blind design, and two others were single blind. One study did not mention blinding. ITT likely used in all studies. Participants were lost to follow-up in only two studies (0.3% and 2.2%).

<sup>d</sup> $I^2 = 37\%$ ; point effect estimate in favor of bid dose in Merli et al<sup>16</sup> and in favor of once-daily dose in Charbonnier et al.<sup>25</sup>

<sup>e</sup>Imprecision judged relative to no difference.

<sup>f</sup> $I^2 = 65\%$ ; point effect estimate in favor of bid dose in Merli et al<sup>16</sup> and in favor of once-daily dose in Charbonnier et al.<sup>25</sup>

**Table S9—[Section 2.7] Evidence Profile: Home Treatment vs Hospital Treatment of Acute DVT<sup>a,d</sup>**

| Participants (Studies), Follow-up | Quality Assessment                   |                                       |                       |                        |                                                                    | Summary of Findings         |                         |                     |                              |                              |                                               |
|-----------------------------------|--------------------------------------|---------------------------------------|-----------------------|------------------------|--------------------------------------------------------------------|-----------------------------|-------------------------|---------------------|------------------------------|------------------------------|-----------------------------------------------|
|                                   | Risk of Bias                         | Inconsistency                         | Indirectness          | Imprecision            | Publication Bias                                                   | Overall Quality of Evidence | Study Event Rates (%)   |                     | Anticipated Absolute Effects |                              |                                               |
|                                   |                                      |                                       |                       |                        |                                                                    |                             | With Hospital Treatment | With Home Treatment | Relative Effect (95% CI)     | Risk With Hospital Treatment | Risk Difference With Home Treatment (95% CI)  |
| 1,708 (6 studies), 3 mo           | No serious risk of bias <sup>c</sup> | No serious inconsistency              | Serious <sup>ab</sup> | Serious <sup>f</sup>   | Mortality (important outcome)                                      |                             | 39/851 (4.6)            | 28/857 (3.3)        | RR 0.72 (0.45-1.15)          | 46 per 1,000                 | 13 fewer per 1,000 (from 25 fewer to 7 more)  |
|                                   |                                      |                                       |                       |                        | Undetected Low <sup>ab,de,f</sup> due to indirectness, imprecision |                             |                         |                     |                              |                              |                                               |
| 1,708 (6 studies), 3 mo           | No serious risk of bias <sup>c</sup> | No serious inconsistency              | Serious <sup>ab</sup> | No serious imprecision | Recurrent VTE (critical outcome)                                   |                             | 63/851 (7.4)            | 39/857 (4.6)        | RR 0.61 (0.42-0.9)           | 74 per 1,000                 | 29 fewer per 1,000 (from 7 fewer to 43 fewer) |
|                                   |                                      |                                       |                       |                        | Undetected Moderate <sup>ab,c</sup> due to indirectness            |                             |                         |                     |                              |                              |                                               |
| 1,708 (6 studies), 3 mo           | No serious risk of bias <sup>c</sup> | No serious inconsistency              | Serious <sup>ab</sup> | Serious <sup>f</sup>   | Major bleeding (critical outcome)                                  |                             | 18/851 (2.1)            | 12/857 (1.4)        | RR 0.67 (0.33-1.36)          | 21 per 1,000                 | 7 fewer per 1,000 (from 14 fewer to 8 more)   |
|                                   |                                      |                                       |                       |                        | Undetected Moderate <sup>ab,deg</sup> due to indirectness          |                             |                         |                     |                              |                              |                                               |
| 0 (3 studies) <sup>b</sup> , 3 mo | No serious risk of bias              | No serious inconsistency <sup>g</sup> | Serious <sup>i</sup>  | Serious <sup>k</sup>   | Quality of life (important outcome)                                |                             | ...                     | ...                 | Not pooled                   | See comment <sup>h,k</sup>   | See comment <sup>h,k</sup>                    |
|                                   |                                      |                                       |                       |                        | Undetected Low <sup>g,k</sup> due to indirectness, imprecision     |                             |                         |                     |                              |                              |                                               |

**Bibliography:** Othieno et al<sup>29</sup>, included studies.<sup>13,14,30-33</sup> Quality of life.<sup>13,34,35</sup> See Table S1 and S2 for expansion of abbreviations.

<sup>a</sup>Four studies had partial hospital treatment of many in the home arm: Koopman et al (mean hospital stay 2.7 in home arm vs 8.1 d in hospital arm), Levine et al (2.1 vs 6.5 d), Boccalon et al (1 vs 9.6 d), and Ramacciotti et al (3 vs 7 d). In Daskalopoulos et al, there was no hospital stay at all in the home group. Chong et al did not report duration of hospital stay.

<sup>b</sup>Only one study (Boccalon et al) used LMWH in both treatment arms. Remaining studies used UFH in the inpatient arm and LMWH in the outpatient arm.

<sup>c</sup>Studies included in the systematic review should have recruited patients whose home circumstances were adequate.

<sup>d</sup>All studies included patients with lower-extremity DVT and excluded patients with suspected or confirmed PE. Studies also excluded patients who were pregnant.

<sup>e</sup>Out of six studies, allocation was clearly concealed in three (unclear in remaining three). Outcome adjudicators were blinded in the two largest studies (unclear in remaining). Four reported loss to follow-up (was significant in only a small study). ITT analysis was conducted in four (unclear in remaining two). No study was stopped early for benefit. Overall, the judgment was that these limitations would not warrant downgrading of quality because it has already been downgraded by at least one level based on other factors.

<sup>f</sup>The CI includes both values suggesting benefit and harm.

<sup>g</sup>Judged as precise based on the narrow CI around absolute effect.

<sup>h</sup>Bäckman et al<sup>34</sup> reported evaluation of health-related quality of life using the EQ-5D. They found no differences in mean quality-of-life scores or in the proportion of patients showing improvement in self-rated health state. Koopman et al evaluated health-related quality of life using the Medical Outcome Study Short Form-20 and an adapted version of the Rotterdam Symptom Checklist. The changes over time were similar in both groups except that the patients receiving LMWH had better scores for physical activity ( $P = .002$ ) and social functioning ( $P = .001$ ) at the end of the initial treatment. The authors did not report enough data to assess precision and clinical significance of results. O'Brien et al<sup>35</sup> assessed changes in quality of life using the Medical Outcome Study Short Form-36 in 300 patients participating in Levine et al.<sup>14</sup> They found that, the change in scores from baseline to day 7 was not significantly different between the treatment groups for seven of the eight domains. The one exception was the domain of social functioning, where a greater improvement was observed for the outpatient group.

<sup>i</sup>Potential inconsistency as Bäckman et al<sup>34</sup> showed no effect, whereas Koopman et al<sup>13</sup> and O'Brien et al<sup>35</sup> showed potential benefit.

<sup>j</sup>Two of the three studies had partial hospital treatment of many in the home arm: Koopman et al<sup>13</sup> (mean hospital stay 2.7 in home arm vs 8.1 d in hospital arm) and Levine et al (2.1 vs 6.5 d).

<sup>k</sup>Not able to evaluate but imprecision is possible. Taken together with the potential inconsistency, we downgraded the quality of evidence by one level.

**Table S10—[Section 2.9] Evidence Profile: Catheter-Directed Thrombolysis vs No Catheter-Directed Thrombolysis for Extensive Acute DVT of the Legs<sup>ab</sup>**

| Participants (Studies), Follow-up | Quality Assessment                   |                          |                         |                           |                  | Summary of Findings                        |                                     |                                     |                                             |                                                              |                                                                |
|-----------------------------------|--------------------------------------|--------------------------|-------------------------|---------------------------|------------------|--------------------------------------------|-------------------------------------|-------------------------------------|---------------------------------------------|--------------------------------------------------------------|----------------------------------------------------------------|
|                                   | Risk of Bias                         | Inconsistency            | Indirectness            | Imprecision               | Publication Bias | Overall Quality of Evidence                | Study Event Rates (%)               |                                     | Anticipated Absolute Effects                |                                                              |                                                                |
|                                   |                                      |                          |                         |                           |                  |                                            | With Catheter-Directed Thrombolysis | With Catheter-Directed Thrombolysis | Risk With No Catheter-Directed Thrombolysis | Risk Difference With Catheter-Directed Thrombolysis (95% CI) |                                                                |
| 153 (2 studies), 3 mo             | No serious risk of bias <sup>c</sup> | No serious inconsistency | No serious indirectness | Very serious <sup>d</sup> | Undetected       | Low <sup>cd</sup> due to imprecision       | 3/76 (3.9) <sup>g</sup>             | 0/77 (0)                            | RR 0.14 (0.01-2.71)                         | 39 per 1,000 <sup>e</sup> (from 39 fewer to 67 more)         | 34 fewer per 1,000 (from 39 fewer to 67 more)                  |
| 153 (1 study), 3 mo               | No serious risk of bias <sup>c</sup> | No serious inconsistency | No serious indirectness | Very serious <sup>d</sup> | Undetected       | Low <sup>cd</sup> due to imprecision       | 1/76 (1.3)                          | 0/77 (0)                            | RR 0.35 (0-8.09)                            | 48 per 1,000 <sup>f</sup> (from 48 fewer to 340 more)        | 31 fewer per 1,000 (from 48 fewer to 340 more)                 |
| 153 (2 studies), 7 d              | No serious risk of bias <sup>c</sup> | No serious inconsistency | No serious indirectness | Very serious <sup>d</sup> | Undetected       | Low <sup>cd</sup> due to imprecision       | 0/76 (0)                            | 1/77 (1.3) <sup>g</sup>             | RR 2.00 (0.19-19.46)                        | 29 per 1,000 <sup>h</sup> (from 23 fewer to 535 more)        | 29 more per 1,000 (from 23 fewer to 535 more)                  |
| 138 (2 studies), 2 y              | No serious risk of bias <sup>c</sup> | No serious inconsistency | Serious <sup>i</sup>    | No serious imprecision    | Undetected       | Moderate <sup>cd</sup> due to indirectness | 49/70 (70)                          | 23/68 (33.8)                        | RR 0.46 (0-0.79)                            | 588 per 1,000 (from 123 fewer to 588 fewer) <sup>k</sup>     | 318 fewer per 1,000 (from 123 fewer to 588 fewer) <sup>k</sup> |

(Continued)

**Table S10—Continued**

| Participants (Studies), Follow-up                                                                                                                                                                                                                                                                                                                                                                                                                             | Quality Assessment                     |                          |                         |                        | Summary of Findings |                             |                       |                          |                                                                                                             |
|---------------------------------------------------------------------------------------------------------------------------------------------------------------------------------------------------------------------------------------------------------------------------------------------------------------------------------------------------------------------------------------------------------------------------------------------------------------|----------------------------------------|--------------------------|-------------------------|------------------------|---------------------|-----------------------------|-----------------------|--------------------------|-------------------------------------------------------------------------------------------------------------|
|                                                                                                                                                                                                                                                                                                                                                                                                                                                               | Risk of Bias                           | Inconsistency            | Indirectness            | Imprecision            | Publication Bias    | Overall Quality of Evidence | Study Event Rates (%) | Relative Effect (95% CI) | Anticipated Absolute Effects                                                                                |
| 98 (1 study),<br>16 mo                                                                                                                                                                                                                                                                                                                                                                                                                                        | No serious risk of bias <sup>m,n</sup> | No serious inconsistency | No serious indirectness | No serious imprecision | Undetected          | Low <sup>m,n</sup>          | 30                    | 68                       | Risk With No Catheter-Directed Thrombolysis<br>Risk Difference With Catheter-Directed Thrombolysis (95% CI) |
| Quality of life (important outcome; measured with the Medical Outcome Survey Short Form-12, Health Utilities Index MARK version 2/3 questionnaires; better indicated by lower values)<br>See footnote <sup>o</sup>                                                                                                                                                                                                                                            |                                        |                          |                         |                        |                     |                             |                       |                          |                                                                                                             |
| Bibliography: Elsharawy et al, <sup>36</sup> Enden et al, <sup>37</sup> Comerota et al. <sup>38</sup> CDT = catheter-directed thrombolysis; PTS = postthrombotic syndrome. See Table S1 legend for expansion of other abbreviations.                                                                                                                                                                                                                          |                                        |                          |                         |                        |                     |                             |                       |                          |                                                                                                             |
| <sup>a</sup> All patients were anticoagulated per protocol, but the intervention group received CDT in addition to anticoagulation.                                                                                                                                                                                                                                                                                                                           |                                        |                          |                         |                        |                     |                             |                       |                          |                                                                                                             |
| <sup>b</sup> In selected patients with extensive acute proximal DVT (eg, iliofemoral DVT; symptoms for < 14 d, good functional status, life expectancy ≥ 1 y) who have a low risk of bleeding.                                                                                                                                                                                                                                                                |                                        |                          |                         |                        |                     |                             |                       |                          |                                                                                                             |
| <sup>c</sup> Allocation was concealed in Enden et al and unclear in Elsharawy et al. Outcome assessor blinded in both studies. Follow-up rates were 87% in Enden et al and 100% in Elsharawy et al. None of the studies was stopped early for benefit.                                                                                                                                                                                                        |                                        |                          |                         |                        |                     |                             |                       |                          |                                                                                                             |
| <sup>d</sup> CI includes values suggesting both benefit and harm.                                                                                                                                                                                                                                                                                                                                                                                             |                                        |                          |                         |                        |                     |                             |                       |                          |                                                                                                             |
| <sup>e</sup> Three control patients died of cancer.                                                                                                                                                                                                                                                                                                                                                                                                           |                                        |                          |                         |                        |                     |                             |                       |                          |                                                                                                             |
| <sup>f</sup> Baseline risks for nonfatal recurrent VTE and for major bleeding derived from Douketis et al. <sup>39</sup>                                                                                                                                                                                                                                                                                                                                      |                                        |                          |                         |                        |                     |                             |                       |                          |                                                                                                             |
| <sup>g</sup> In the Enden et al study, one patient had “durable and partial impairment of sensibility of the foot” immediately after receiving CDT, and nine patients had minor bleeding complications.                                                                                                                                                                                                                                                       |                                        |                          |                         |                        |                     |                             |                       |                          |                                                                                                             |
| <sup>h</sup> Most of bleeding events occur during the first 7 d.                                                                                                                                                                                                                                                                                                                                                                                              |                                        |                          |                         |                        |                     |                             |                       |                          |                                                                                                             |
| <sup>i</sup> Surrogate outcome: absence of patency at 6 mo in Enden et al study; absence of complete lysis at 6 mo in Elsharawy et al study.                                                                                                                                                                                                                                                                                                                  |                                        |                          |                         |                        |                     |                             |                       |                          |                                                                                                             |
| <sup>j</sup> This estimate is based on the findings of the VETO (Venous Thrombosis Outcomes) study. <sup>40</sup> This probably underestimates PTS baseline risk given that overall, 52% of patients reported the current use of compression stockings during study follow-up.                                                                                                                                                                                |                                        |                          |                         |                        |                     |                             |                       |                          |                                                                                                             |
| <sup>k</sup> Severe PTS: assuming the same RR of 0.46 and a baseline risk of 13.8%, the absolute reduction is 75 fewer severe PTS per 1,000 (from 29 fewer to 138 fewer) over 2 y.                                                                                                                                                                                                                                                                            |                                        |                          |                         |                        |                     |                             |                       |                          |                                                                                                             |
| <sup>l</sup> Camerota et al. <sup>38</sup>                                                                                                                                                                                                                                                                                                                                                                                                                    |                                        |                          |                         |                        |                     |                             |                       |                          |                                                                                                             |
| <sup>m</sup> Participation rate was 65%.                                                                                                                                                                                                                                                                                                                                                                                                                      |                                        |                          |                         |                        |                     |                             |                       |                          |                                                                                                             |
| <sup>n</sup> Recall was used to measure quality of life prior to the thrombotic event; we did not consider these measurements.                                                                                                                                                                                                                                                                                                                                |                                        |                          |                         |                        |                     |                             |                       |                          |                                                                                                             |
| <sup>o</sup> At the initial follow-up (mean, 16 mo), patients treated with CDT reported a trend toward a higher mental summary scale ( $P = .087$ ) and improved Health Utilities Index ( $P = .078$ ). They reported better overall role physical functioning ( $P = .046$ ), less stigma ( $P = .033$ ), less health distress ( $P = .022$ ), and fewer overall symptoms ( $P = .006$ ) compared with patients who were treated with anticoagulation alone. |                                        |                          |                         |                        |                     |                             |                       |                          |                                                                                                             |

**Table S11—[Section 2.9] CDT vs No CDT for Extensive Acute DVT of the Leg: Clinical Description and Results (All Randomized Trials and Prospective Observational Studies of at Least 20 Patients)**

| Author/Year                         | Type of Publication  | Participants                                                                    | Interventions                                                                                                                                                                                                                                                                              | Outcomes                  | Follow-up    | Results                                                                                                                                                                                                                    |
|-------------------------------------|----------------------|---------------------------------------------------------------------------------|--------------------------------------------------------------------------------------------------------------------------------------------------------------------------------------------------------------------------------------------------------------------------------------------|---------------------------|--------------|----------------------------------------------------------------------------------------------------------------------------------------------------------------------------------------------------------------------------|
| Semba et al <sup>14</sup> /1994     | Prospective registry | 21 patients (27 limbs) with iliofemoral DVT ≤ 14 d (20) or > 14 d (7) duration  | 4.9 million units urokinase (mean) infused over 30 h (mean), followed by heparin and then warfarin for 8-12 wk<br>Adjunctive therapy: limbs with residual stenoses > 50% received angioplasty (2) or stenting (14)                                                                         | Clot lysis, complications | 3 mo         | Significant lysis: 18/25* (72%)<br>Partial lysis: 5/25 (20%)<br>No lysis: 2/25 (8%)<br>Complications: 1 small hematoma at puncture site, no intervention/transfusion                                                       |
| Verhaeghe et al <sup>42</sup> /1997 | Prospective study    | 24 patients with iliofemoral DVT ≤ 14 d (16) or > 14 d (8) duration             | 3 mg/h rt-PA (mean 86 mg) infused with 1,000 U/h IV heparin, followed by heparin, adjusted to APTT<br>Adjunctive therapy: hydrodynamic thrombectomy (3) and stents (9)                                                                                                                     | Clot lysis, bleeding      | 13 mo (mean) | Significant lysis: 19/24 (79%)<br>Partial lysis: 5/24 (21%)<br>Bleeding: 6/24 (25%)<br>Patency:<br>3 mo: 84%<br>1 y: 78%                                                                                                   |
| Bjarnason et al <sup>43</sup> /1997 | Prospective registry | 77 patients (87 limbs) with iliofemoral DVT ≤ 14 d (69) or > 14 d (18) duration | 2,000-2,500 units/kg per h urokinase infused for 75 h (mean) with 5,000 International Units bolus heparin plus infusion adjusted to aPTT<br>Adjunctive therapy: angioplasty (52 limbs), stent (38), AVF (15), surgical thrombectomy (13), mechanical thrombectomy (4), surgical bypass (3) | Clot lysis, PE, bleeding  | 1 y          | Early results:<br>Significant lysis: 69/87 (79%)<br>Iliac (63%)<br>Femoral (40%)<br>No lysis: 18/87 (21%)<br>PE: 1 (1%)<br>Bleeding: major, 5/77 (6%); minor, 11/77 (14%)<br>Patency at 1 y:<br>Iliac: 63%<br>Femoral, 40% |

(Continued)

**Table S11—Continued**

| Author/Year                                                            | Type of Publication              | Participants                                                                                                                                                                                                                    | Interventions                                                                                                                                                                                                                                   | Outcomes                        | Follow-up      | Results                                                                                                                                                                                                                                |
|------------------------------------------------------------------------|----------------------------------|---------------------------------------------------------------------------------------------------------------------------------------------------------------------------------------------------------------------------------|-------------------------------------------------------------------------------------------------------------------------------------------------------------------------------------------------------------------------------------------------|---------------------------------|----------------|----------------------------------------------------------------------------------------------------------------------------------------------------------------------------------------------------------------------------------------|
| Meuwissen et al <sup>44</sup> /1999<br>(National Multicenter Registry) | Prospective multicenter registry | 287 patients (312 infusions) with lower limb DVT ≤ 10 d (188) or > 10 d (99) duration                                                                                                                                           | 7.8 million units urokinase (mean) infused for 53.4 h (mean) in 297 limbs<br>In 6 limbs, only systemic infusion (no CDT)<br>Adjunctive therapy: stents (104), systemic infusion (54)                                                            | Clot lysis, PE, bleeding, death | 1 y            | Early results:<br>50%-100% lysis: 258/312 (83%)<br><50% lysis: 54/312 (17%)<br>PE: 6/473 <sup>b</sup> (1%)<br>Bleeding: 54/473 <sup>b</sup> (11%)<br>Death: 2/473 <sup>b</sup> (< 1%)<br>Patency at 1 y:<br>Iliac: 64%<br>Femoral: 47% |
| AbuRahma et al <sup>65</sup> /2001                                     | Prospective study                | 51 patients (51 limbs) with iliofemoral DVT given choice between conventional therapy (heparin + warfarin) or lysis + angio/stent (if needed). Lysis offered only to patients with DVT ≤ 14 d duration and no contraindications | Anticoagulation: 33 patients given 1,000-2000 units/h heparin infusion for 5-7 d.                                                                                                                                                               | Clot lysis, PE, bleeding        | Anticoag: 6 mo | Anticoagulation:<br>30-d significant lysis: 1/33 (3%)<br>6-mo patency: 8/33 (24%)<br>Bleeding: 2/33 (6%)<br>PE: 2/33 (6%)                                                                                                              |
| Elsarawy et al <sup>66</sup> /2002                                     | RCT, single center               | 35 patients with DVT < 10 d duration randomized to CDT or anticoagulation alone                                                                                                                                                 | CDT: 18 patients given loading dose 4,500 units urokinase followed by 4,500 units/kg per h for 24-48 h or 4-8-mg bolus of rt-PA followed by 2-4-mg/h infusion<br>Adjunctive therapy: patients with residual stenosis > 50% received stents (10) | Clot lysis, PE, bleeding        | CDT: 6 mo?     | CDT:<br>30-d significant lysis: 15/18 (83%)<br>6-mo patency: 15/18 (83%)<br>Bleeding: 2/18 (11%)                                                                                                                                       |
|                                                                        |                                  |                                                                                                                                                                                                                                 | CDT: 18 patients received ~1 million units SK pulse-spray for 1 h, followed by 100,000 units/h SK infusion until complete lysis, no change in 12 h, or complication<br>Adjunctive therapy: angioplasty/stent (1)                                | Clot lysis, PE, bleeding        | 1 wk and 6 mo  | CDT, 1 wk<br>Complete lysis: 11/18 (61%)<br>No lysis: 0 (0%)<br>PE: 0<br>Bleeding: 0<br>Anticoagulation, 1 wk:<br>Complete lysis: 0/17 (0%)<br>No lysis: 17/17 (100%)<br>PE: 1/17 (6%)<br>Bleeding: 0                                  |

(Continued)

**Table S11—Continued**

| Author/Year                                 | Type of Publication | Participants                    | Interventions                                                                                                                                                                                                                                                              | Outcomes                                        | Follow-up     | Results                                                                                                                                                                                                                                                                                                                                                                                                                                                    |
|---------------------------------------------|---------------------|---------------------------------|----------------------------------------------------------------------------------------------------------------------------------------------------------------------------------------------------------------------------------------------------------------------------|-------------------------------------------------|---------------|------------------------------------------------------------------------------------------------------------------------------------------------------------------------------------------------------------------------------------------------------------------------------------------------------------------------------------------------------------------------------------------------------------------------------------------------------------|
| Enden et al <sup>37</sup> /2009<br>(CaVenT) | RCT, multicenter    | Iliofemoral DVT < 21 d duration | Anticoagulation: 17 patients received 5,000 units heparin bolus, followed by heparin adjusted to aPTT<br><br>CDT: tPA 0.01 mg/kg per h, maximum of 20 mg/24 h for 4 d. Treated in four referral centers<br><br>Anticoagulation alone: usual practice, administered locally | Clot lysis, PE, bleeding (PTS at 24 mo pending) | 1 wk and 6 mo | CDT, 6 mo<br>Complete lysis: 13/18 (72%)<br>No lysis: 0 (0%)<br>Anticoagulation, 6 mo<br>Significant lysis: 2/17 (12%)<br>No lysis: 7/17 (41%)<br><br>CDT, 1 wk<br>≥50% lysis: 44/50 (68%)<br>PE: 0<br>Major bleeding: 1/50<br>Anticoagulation, 1 wk:<br>Lysis not assessed<br>PE: 0<br>Major bleeding: 0<br>(puncture site nerve damage: 0)<br>CDT, 6 mo<br>Iliofemoral patency: 32/50 (64%)<br>Anticoagulation, 6 mo<br>Iliofemoral patency: 19/53 (36%) |

Early prospective observational studies with < 20 patients and retrospective studies are described in Table 3 of the eighth edition of these guidelines.<sup>46</sup> AVF = arteriovenous fistula; CaVenT = Catheter-Directed Venous Thrombolysis in Acute Iliofemoral Vein Thrombosis; rt-PA = recombinant tissue plasminogen activator; SK = streptokinase. See Table S2, S4, S5, and S10 legends for expansion of other abbreviations.

<sup>a</sup> Twenty-five of 27 limbs treated with CDT; two could not be crossed with the guidewire.

<sup>b</sup> Calculated from total number of patients in Venous Registry.

**Table S12—[Section 2.9] CDT vs No CDT for Extensive Acute DVT of the Leg: Methodologic Quality**

| Author/Year                         | Randomization             | Allocation Concealment | Blinding                                                                          | Loss to follow-up                                                                |
|-------------------------------------|---------------------------|------------------------|-----------------------------------------------------------------------------------|----------------------------------------------------------------------------------|
| Semba et al <sup>41</sup> /1994     | N/A                       | N/A                    | N/A                                                                               | N/A                                                                              |
| Verhaeghe et al <sup>42</sup> /1997 | N/A                       | N/A                    | N/A                                                                               | N/A                                                                              |
| Bjarnason et al <sup>43</sup> /1997 | N/A                       | N/A                    | N/A                                                                               | N/A                                                                              |
| Mewissen et al <sup>44</sup> /1999  | N/A                       | N/A                    | N/A                                                                               | N/A                                                                              |
| AbuRahma et al <sup>45</sup> /2001  | N/A                       | N/A                    | N/A                                                                               | N/A                                                                              |
| Elsharawy et al <sup>36</sup> /2002 | Computer-designated cards | PN                     | N for patients, caregivers, and probably data analysts.<br>Y for vascular imaging | 0                                                                                |
| Enden et al <sup>37</sup> /2009     | Computer-designated cards | Y                      | No for patients and caregivers. Yes for vascular imaging.                         | One loss to follow-up (CDT), five withdrawals, five postrandomization exclusions |

N = no; N/A = not applicable; Y = yes. See Table S10 legend for expansion of other abbreviation.



**Table S13—[Section 2.10] Systemic Lysis vs No Systemic Lysis for Extensive Acute DVT of the Leg: Clinical Description and Results (Randomized Trials That Compared Systemic Thrombolytic Therapy With No Thrombolytic Therapy)**

| Author/Year                         | Type of Publication | Participants                                                   | Interventions                                                                                                                                                                                                           | Outcomes                        | Follow-up | Results                                                                                                                                                                                                                                                                                                     |
|-------------------------------------|---------------------|----------------------------------------------------------------|-------------------------------------------------------------------------------------------------------------------------------------------------------------------------------------------------------------------------|---------------------------------|-----------|-------------------------------------------------------------------------------------------------------------------------------------------------------------------------------------------------------------------------------------------------------------------------------------------------------------|
| Browse et al <sup>52</sup> /1968    | RCT, single center  | 10 patients with lower-extremity DVT confirmed by phlebography | Lysis: 600,000 units SK plus 100 mg hydrocortisone for first hour, then continued every 6 h for 3 d (5 patients)<br>Anticoagulation: 4-6 hourly doses of heparin 5,000 units for 48 h followed by warfarin (5 patients) | Clot lysis, PE, bleeding        | 7-10 d    | Thrombolysis:<br>Complete clot lysis: 3/5 (60%)<br>Partial lysis: 1/5 (20%)<br>No lysis: 1 (20%)<br>PE: 0<br>Bleeding: 0<br>Anticoagulation:<br>Complete clot lysis: 0/5<br>Partial lysis: 0/5<br>No lysis: 5/5 (100%)<br>PE: 0<br>Bleeding: 0                                                              |
| Robertson et al <sup>53</sup> /1968 | RCT, single center  | 16 patients with DVT                                           | Thrombolysis: SK 200,000 units over 90 min, then 100,000 units as maintenance dose for 22.5 h; heparin 500 mg given during 24 h, plus prednisone (8 patients)<br>Anticoagulation: Heparin plus prednisone (8 patients)  | Clot lysis, bleeding            | 7 d       | Thrombolysis:<br>Significant lysis: 5/8 (63%)<br>Partial lysis: 2/8 (25%)<br>No lysis: 1/8 (12%)<br>Bleeding: Major: 2/8 (25%)<br>Minor: 2/8 (25%)<br>Anticoagulation:<br>Significant lysis: 1/8 (12%)<br>Partial lysis: 2/8 (25%)<br>No lysis: 5/8 (63%)<br>Bleeding: Major: 1/8 (12%)<br>Minor: 1/8 (12%) |
| Kakkar et al <sup>54</sup> /1969    | RCT, single center  | 30 patients with DVT of < 4 d                                  | Thrombolysis: SK 500,000 units IV over 30 min; 900,000 units every 6 h × 5 d (10 patients)                                                                                                                              | Clot lysis, PE, bleeding, death | 6-12 mo   | Thrombolysis:<br>Complete clot lysis: 6/9 (67%)<br>Partial lysis: 1/9 (11%)<br>No lysis: 2/9 (22%)<br>PE: 0<br>Bleeding: 4/10 (40%)<br>Death: 2/9 (22%)<br>Note: (1 patient excluded from treatment)                                                                                                        |

(Continued)

**Table S13—Continued**

| Author/Year                       | Type of Publication | Participants                            | Interventions                                                                                                                                                                                                                                                                      | Outcomes                 | Follow-up | Results                                                                                                                                                                                                                                                                                                                                                                          |
|-----------------------------------|---------------------|-----------------------------------------|------------------------------------------------------------------------------------------------------------------------------------------------------------------------------------------------------------------------------------------------------------------------------------|--------------------------|-----------|----------------------------------------------------------------------------------------------------------------------------------------------------------------------------------------------------------------------------------------------------------------------------------------------------------------------------------------------------------------------------------|
| Tsapogas et al <sup>53/1973</sup> | RCT, single center  | 34 patients with DVT of < 5 d           | Arvin: Arvin loading dose 80 units IV over 6 h; 80 units over 15 min; 40-80 units every 6 h × 5 d (10 patients)<br>Anticoagulation: Heparin 10,000 units IV over 5 min, then 10,000-15,000 units every 6 h × 5 d (10 patients)                                                     | Clot lysis, PE, bleeding | 7 d       | Arvin:<br>Complete lysis: 1/10 (10%)<br>Partial lysis: 3/10 (30%)<br>No lysis: 6/10 (60%)<br>PE: 0<br>Bleeding: 0<br>Death: 0<br>Anticoagulation:<br>Complete clot lysis: 2/9 (22%)<br>Partial lysis: 2/9 (22%)<br>No lysis: 5/9 (55%)<br>PE: 1/10<br>Death: 2/9 (22%)<br>Bleeding: 2/9 (22%)<br>Note: (1 patient excluded from treatment)                                       |
|                                   |                     |                                         | Thrombolysis: titrated initial dose of SK IV, then SK 100,000 units/h maintained and adjusted up to 72 h IV heparin for 1 wk 6-12 h post SK (19 patients)<br>Anticoagulation: Heparin IV into affected limb, 7,000 units bolus then 1,500 units/h adjusted; continued for 7 d (15) |                          |           | Thrombolysis:<br>Complete/partial lysis: 10/19 (53%)<br>No lysis: 9/19 (47%)<br>PE: 0<br>Minor bleeding: 3 (16%)<br>Anticoagulation:<br>Complete/partial lysis: 1/15 (7%)<br>No lysis: 14/15 (93%)<br>PE: 1/15 (7%)<br>Bleeding: 0                                                                                                                                               |
| Duckert et al <sup>56/1975</sup>  | Prospective study   | 134 patients with acute or subacute DVT | Thrombolysis: initial dose SK calculated according to tolerance injected over 15-30 min; maintenance dose at 30 mL/h was two-thirds of first dose (92 patients)<br>Anticoagulation: 5,000 units heparin for initial dose followed by 25,000 units/24 h infusion (42 patients).     | Clot lysis, PE, bleeding | ~7 d      | Thrombolysis:<br>Significant lysis: 39/92 (42%)<br>Partial lysis: 23/92 (25%)<br>No lysis: 30/92 (33%)<br>PE: 7 (8%)<br>Major bleeding: 58 (62%)<br>Minor bleeding: 24 (26%) <sup>s</sup><br>Anticoagulation:<br>Significant lysis: 0/42 (0%)<br>Partial lysis: 4/42 (10%)<br>No lysis: 38/42 (90%)<br>PE: 5/42 (12%)<br>Major bleeding: 2/42 (5%)<br>Minor bleeding: 4/42 (10%) |

(Continued)

**Table S13—Continued**

| Author/Year                       | Type of Publication | Participants                            | Interventions                                                                                                                                                                                                                                                                 | Outcomes                                         | Follow-up | Results                                                                                                                                                                                                                                                                                              |
|-----------------------------------|---------------------|-----------------------------------------|-------------------------------------------------------------------------------------------------------------------------------------------------------------------------------------------------------------------------------------------------------------------------------|--------------------------------------------------|-----------|------------------------------------------------------------------------------------------------------------------------------------------------------------------------------------------------------------------------------------------------------------------------------------------------------|
| Porter et al <sup>67</sup> /1975  | RCT, single center  | 50 patients with DVT < 14 d duration    | Thrombolysis: SK 250,000 units IV over 30 min, then 100,000 units/h titrated for 72 h followed by IV heparin titrated over 7 d (23 patients)<br>Anticoagulation: IV heparin 150 units/kg loading dose then titrated for 10 d (26 patients)                                    | Clot lysis, PE, bleeding, death due to treatment | 10 d      | Thrombolysis<br>Complete lysis: 6/23 (26%)<br>Partial lysis: 15/23 (65%)<br>No lysis: 2/23 (9%)<br>PE: 0<br>Bleeding: 4/23 (17%)<br>Death: 1 (4%)<br>Anticoagulation:<br>Complete lysis: 1/26 (4%)<br>Partial lysis: 20/26 (77%)<br>No lysis: 5/26 (19%)<br>PE: 0<br>Bleeding: 1/26 (4%)<br>Death: 0 |
| Marder et al <sup>68</sup> /1977  | RCT, single center  | 24 patients with DVT                    | Thrombolysis: initial dose of 250,000 units SK for 20 min, followed by 100,000 units/h for 72 h (12 patients)<br>Anticoagulation: initial dose heparin 150 units/kg IV, followed by titrated infusion for 72 h<br>Cotreatment: 100 mg bolus hydrocortisone prior to treatment | Clot lysis, death due to treatment               | 5 d       | Thrombolysis:<br>Significant lysis: 5/12 (42%)<br>Partial lysis: 2/12 (16%)<br>No lysis: 5/12 (42%)<br>Death: 1/12 (8%)<br>Anticoagulation:<br>Significant lysis: 0/12 (0%)<br>Partial lysis: 3/12 (25%)<br>No lysis: 9/12 (75%)<br>Death: 0                                                         |
| Arnesen et al <sup>69</sup> /1978 | RCT, single center  | 42 patients with proximal DVT of < 5 d. | Thrombolysis: loading dose of SK 250,000 units IV, then 100,000 International Units/h IV for 72-96 h (21 patients)<br>Anticoagulation: heparin 15,000 International Units IV bolus, then total of 30,000 International Units IV infusion for 72-90 h (21 patients)            | Clot lysis, PE, bleeding                         | 21 d+6 y  | Thrombolysis:<br>Significant lysis: 15/21 (71%)<br>No lysis: 6/21 (29%)<br>PE: 1/21 (5%)<br>Bleeding: 2/21 (9%)<br>Anticoagulation:<br>Significant lysis: 5/21 (24%)<br>No lysis: 16/21 (76%)<br>PE: 0<br>Bleeding: 2/21 (9%)                                                                        |

(Continued)

**Table S13—Continued**

| Author/Year                        | Type of Publication | Participants                                     | Interventions                                                                                                                                                                                                                                                                                                                   | Outcomes                                                       | Follow-up                                 | Results                                                                                                                                                                                                                                                                                                                                                                                                                  |
|------------------------------------|---------------------|--------------------------------------------------|---------------------------------------------------------------------------------------------------------------------------------------------------------------------------------------------------------------------------------------------------------------------------------------------------------------------------------|----------------------------------------------------------------|-------------------------------------------|--------------------------------------------------------------------------------------------------------------------------------------------------------------------------------------------------------------------------------------------------------------------------------------------------------------------------------------------------------------------------------------------------------------------------|
| Elliot et al <sup>(69)</sup> /1979 | RCT, single center  | 51 patients with clinical history of DVT of <8 d | Thrombolysis: loading dose of SK 600,000 units infused over 30 min, followed by 100,000/h for 3 d; heparin for 4 d following SK (26 patients)<br>Anticoagulation: heparin 10,000 units IV initially, followed by 10,000 units IV daily for a 6-h infusion to maintain clotting time of 2.5-3 times normal for 7 d (25 patients) | Immediate: clot lysis, PE, bleeding<br>Long term: symptom free | Immediate: 5 d<br>Long term: 19 mo (mean) | Immediate:<br>Thrombolysis:<br>Significant lysis: 17/26 (65%)<br>Partial lysis: 1/26 (4%)<br>No lysis: 8/26 (31%)<br>PE: 0<br>Bleeding: 2 (8%)<br>Anticoagulation:<br>Significant lysis: 0/25 (0%)<br>Partial lysis: 0/25 (0%)<br>No lysis: 25/25 (100%)<br>PE: 0<br>Bleeding: 2/21 (9%)<br>Long term:<br>Thrombolysis:<br>Symptom-free: 12/20 <sup>a</sup> (60%)<br>Treatment 2<br>Symptom-free: 2/21 <sup>b</sup> (9%) |
| Watz et al <sup>(69)</sup> /1979   | Prospective study   | 35 patients with DVT                             | Thrombolysis: initial dose of SK 250,000 units in 30 min, followed by maintenance 100,000 units/h (18 patients)<br>Anticoagulation: heparin 45,000 units daily with warfarin (17)                                                                                                                                               | Clot lysis, PE, bleeding                                       | 1-2 mo                                    | Thrombolysis:<br>Significant lysis: 8/18 (44%)<br>Partial lysis: 4/18 (22%)<br>No lysis: 6/18 (34%)<br>PE: 1/18 (5%)<br>Minor bleeding: 3/18 (12%)<br>Anticoagulation:<br>Significant lysis: 1/17 (6%)<br>Partial lysis: 5/17 (29%)<br>No lysis: 11/17 (65%)<br>PE: 1/17 (6%)<br>Minor bleeding: 2/17 (12%)                                                                                                              |

(Continued)

**Table S13—Continued**

| Author/Year                         | Type of Publication                                  | Participants                      | Interventions                                                                                                                                                                                                                                                                                                           | Outcomes                  | Follow-up | Results                                                                                                                                                                                                                                           |
|-------------------------------------|------------------------------------------------------|-----------------------------------|-------------------------------------------------------------------------------------------------------------------------------------------------------------------------------------------------------------------------------------------------------------------------------------------------------------------------|---------------------------|-----------|---------------------------------------------------------------------------------------------------------------------------------------------------------------------------------------------------------------------------------------------------|
| Kil et al <sup>62</sup> /1981       | RCT, single center                                   | 20 patients with DVT of <72 h     | Thrombolysis: urokinase 200,000 units IV for 24 h; after 18 h, heparin loading dose of 15,000 units, then 40,000 units/d for 5 d (11 patients)<br>Anticoagulation: heparin 40,000 units/day 4 for 6 d (9 patients)                                                                                                      | Clot lysis, PE, bleeding  | 2 wk      | Thrombolysis:<br>Partial lysis: 1/11 (9%)<br>No lysis: 10/11 (91%)<br>PE: 0<br>Bleeding: 3/11 (27%)<br>Anticoagulation:<br>Partial lysis: 1/8 (12%)<br>No lysis: 7/8 (88%)<br>PE: 0<br>Bleeding: 3/9 (33%)<br>Note: 1 patient excluded from group |
| Amesen et al <sup>63</sup> /1982    | Follow-up to RCT of Arnesen (1978)                   | 35/42 patients from RCT           | Phlebography and clinical examination by blinded evaluators                                                                                                                                                                                                                                                             | Normal legs, PTS symptoms | 6.5 y     | Thrombolysis:<br>Normal legs: 13/17 (77%)<br>PTS symptoms (moderate): 4/17 (24%)<br>Anticoagulation:<br>Normal legs: 6/18 (33%)<br>PTS symptoms (moderate): 9/18 (50%)                                                                            |
| Schulman et al <sup>49</sup> /1986  | RCT, single center                                   | 36 patients with calf DVT of <7 d | Thrombolysis: SK 50,000 over 15 min, then 100,000 International Units over 12 h for up to 7 d, titrated; given with heparin 5,000 International Units IV over 12 h (17 patients)<br>Anticoagulation: heparin 5,000 International Units IV for 15 min then 30,000 International Units/d, titrated over 7 d (19 patients) | Clot lysis, bleeding, PE  | 5 y       | Thrombolysis:<br>Complete lysis: 7/17 (41%)<br>Bleeding: 3/17 (18%)<br>PE: 0<br>Anticoagulation:<br>Complete lysis: 2/19 (10%)<br>Bleeding: 1/19 (5%)<br>PE: 0                                                                                    |
| Verhaeghe et al <sup>57</sup> /1989 | Prospective cohort study (A) and multicenter RTC (B) | 32 patients with DVT of <10 d     | Study A: open-label study with rt-PA 100 mg over IV 8 h (day 1), 50 mg rt-PA over 8 h (day 2); 10% dose as bolus (11 patients)                                                                                                                                                                                          | Clot lysis, bleeding      | 72 h      | Note: Authors assigned veins a relative value reflecting degree of thrombolysis (maximum, 40 units: complete thrombolysis). The unit scores reflect the reduction in thrombolysis postlysis.                                                      |

(Continued)

**Table S13—Continued**

| Author/Year                         | Type of Publication | Participants                                      | Interventions                                                                                                                                                                                                                                                                                                                                                                                                                                                                                                                      | Outcomes             | Follow-up | Results                                                                                                                                                                                                                                                                                                                                                                                           |
|-------------------------------------|---------------------|---------------------------------------------------|------------------------------------------------------------------------------------------------------------------------------------------------------------------------------------------------------------------------------------------------------------------------------------------------------------------------------------------------------------------------------------------------------------------------------------------------------------------------------------------------------------------------------------|----------------------|-----------|---------------------------------------------------------------------------------------------------------------------------------------------------------------------------------------------------------------------------------------------------------------------------------------------------------------------------------------------------------------------------------------------------|
|                                     |                     |                                                   | <p>Study B: rt-PA 100 mg: IV of 100 mL containing rt-PA 100 mg infused over 8 h (day 1), IV of 100 mL containing 50 mg rt-PA infused over 8 h (day 2); 10% dose as bolus (8 patients)</p> <p>rt-PA 50 mg: IV of 100 mL containing rt-PA 50 mg infused over 8 h on both days 1 and 2; 10% dose as bolus (6 patients)</p> <p>Placebo: IV of 100 mL containing placebo infused over 8 h on both days 1 and 2 (7 patients)</p> <p>Co-treatment: heparin 5,000 units IV bolus then continuous infusion 1,000 units/h for up to 72 h</p> |                      |           | <p>Study A<br/>Change in unit score: - 3.2</p> <p>Study B<br/>rt-PA 100 mg:<br/>Change in unit score: - 24.3<br/>Bleeding: 6</p> <p>rt-PA 50 mg:<br/>Change in unit score: - 34.3<br/>Bleeding: 3</p> <p>Placebo:<br/>Change in unit score: - 2.8<br/>Bleeding: 0</p>                                                                                                                             |
| Goldhaber et al <sup>69</sup> /1990 | RCT, multicenter    | 64 patients (65 randomizations) with DVT of <14 d | <p>rt-PA: rt-PA 0.05 mg/kg per h IV for 24 h, then heparin 100 units/kg bolus, then 1,000 units/h, adjusted (36 patients)</p> <p>rt-PA + heparin: rt-PA as in group 1 plus heparin concomitantly (17 patients)</p> <p>Anticoagulation: heparin 100 units/kg bolus, then 1,000 units/h (12 patients)</p>                                                                                                                                                                                                                            | Clot lysis, bleeding | 36 h      | <p>rt-PA:<br/>Complete lysis: 2/32 (6%)<br/>Partial lysis: 18/32 (57%)<br/>No lysis: 12/32 (38%)<br/>Bleeding: 1/32 (3%)</p> <p>rt-PA + heparin:<br/>Complete lysis: 1/17 (6%)<br/>Partial lysis: 8/17 (48%)<br/>No lysis: 8/17 (48%)<br/>Bleeding: 0</p> <p>Anticoagulation:<br/>Partial lysis: 2/11 (18%)<br/>No lysis: 9/11 (89%)<br/>Bleeding: 0</p> <p>Note: 5/65 venograms not analyzed</p> |

(Continued)

**Table S13—Continued**

| Author/Year                         | Type of Publication | Participants                 | Interventions                                                                                                                                                                                                                                                                                                                               | Outcomes                                       | Follow-up   | Results                                                                                                                                                                                                                                                                                                                                                                                                                                                                                              |
|-------------------------------------|---------------------|------------------------------|---------------------------------------------------------------------------------------------------------------------------------------------------------------------------------------------------------------------------------------------------------------------------------------------------------------------------------------------|------------------------------------------------|-------------|------------------------------------------------------------------------------------------------------------------------------------------------------------------------------------------------------------------------------------------------------------------------------------------------------------------------------------------------------------------------------------------------------------------------------------------------------------------------------------------------------|
| Turpie et al <sup>59</sup> /1990    | RCT, multicenter    | 83 patients with DVT of <7 d | Phase 1: Lysis + heparin: two-chain rt-PA 0.5 mg/kg IV for 4 h (12 patients)<br><br>Placebo + heparin (12 patients)<br><br>Phase 2: Lysis + heparin: one-chain rt-PA 0.5 mg/kg IV for 8 h and repeated in 24 h (29 patients)<br><br>Placebo + heparin (30 pts)                                                                              | Clot lysis, bleeding                           | 24-48 h     | Phase 1:<br>Lysis + heparin:<br>≥ 50% lysis: 7/12 (58%)<br>< 50% lysis: 2/12 (17%)<br>No lysis: 3/12 (25%)<br>Bleeding: 4/12 (33%)<br>Placebo + heparin:<br>< 50% lysis: 2/12 (17%)<br>No lysis: 10/12 (83%)<br>Bleeding: 1/12 (8%)<br>Phase 2:<br>Lysis + heparin:<br>≥ 50% lysis: 6/29 (21%)<br>< 50% lysis: 7/29 (24%)<br>No lysis: 15/29 (52%)<br>Bleeding: 1/29 (3%)<br>Placebo + heparin:<br>≥ 50% lysis: 2/30 (7%)<br>< 50% lysis: 5/30 (17%)<br>No lysis: 23/30 (77%)<br>Bleeding: 1/30 (3%) |
| Schweizer et al <sup>65</sup> /1998 | RCT, single center  | 69 patients with DVT of <7 d | Cotreatment: heparin 5,000-unit IV bolus then 30,000 units/24 h, adjusted for 7-10 d<br><br>rt-PA 20 mg IV into pedal vein 4 h/d for 7 d; heparin IV given concomitantly; warfarin day 7-12 mo<br>Urokinase 100,000 International Units/hr IV into pedal vein continuously 7 d; heparin IV 7 d; plasminogen monitored; warfarin day 7-12 mo | 7 d: clot lysis, bleeding<br>1 y: PTS symptoms | 7 d and 1 y | rt-PA:<br>Complete lysis: 6/22 (27%)<br>Bleeding: 1/22 (5%) PTS symptoms: 14/22 (64%)<br>Urokinase:<br>Complete lysis: 11/22 (50%)<br>Bleeding: 1/22 (5%)<br>PTS symptoms: 9/22 (41%)                                                                                                                                                                                                                                                                                                                |

(Continued)

**Table S13—Continued**

| Author/Year                         | Type of Publication | Participants                  | Interventions                                                                                                                                                                                                                                                                                                                                                                                                                                                                                                                                                                                                                                                                                                                                                                              | Outcomes                        | Follow-up | Results                                                                                                                                                                                                                                                                                                                                                                                                                                                                                                                                                                                                                                                                                                                                         |
|-------------------------------------|---------------------|-------------------------------|--------------------------------------------------------------------------------------------------------------------------------------------------------------------------------------------------------------------------------------------------------------------------------------------------------------------------------------------------------------------------------------------------------------------------------------------------------------------------------------------------------------------------------------------------------------------------------------------------------------------------------------------------------------------------------------------------------------------------------------------------------------------------------------------|---------------------------------|-----------|-------------------------------------------------------------------------------------------------------------------------------------------------------------------------------------------------------------------------------------------------------------------------------------------------------------------------------------------------------------------------------------------------------------------------------------------------------------------------------------------------------------------------------------------------------------------------------------------------------------------------------------------------------------------------------------------------------------------------------------------------|
| Schweizer et al <sup>60</sup> /2000 | RCT, multicenter    | 250 patients with DVT of <9 d | Anticoagulation: heparin IV adjusted for 7 d; warfarin day 1-12 mo<br><br>rt-PA: locoregional rt-PA 20 mg/day for 4 h through pedal vein for 4-7 d; IV heparin given simultaneously at 1,000 International Units/h, adjusted<br>Urokinase: locoregional urokinase 100,000 International Units infused continuously; fibrinogen and plasminogen monitored; IV heparin given concomitantly<br>Systemic SK: 3 million units/d for 6 h with heparin for up to 7 d. Premedications: hydrocortisone 100 mg, ranitidine 50 mg, clemastine 2 mg<br><br>Systemic urokinase: 5 million International Units/d for 4 h up to 7 d; IV heparin given concomitantly<br><br>Anticoagulation: heparin IV, adjusted.<br>Cotreatment: bed rest, compression bandages, compression therapy, warfarin for 12 mo | Clot lysis, bleeding, mortality | 1 y       | Anticoagulation:<br>Complete lysis: 0<br>Bleeding: 0 PTS<br>Symptoms: 15/22 (68%)<br><br>rt-PA:<br>Complete lysis: 10/50 (20%)<br>≥ 50% lysis: 7/50 (14%)<br>< 50% lysis: 16/50 (32%)<br>No lysis: 13/50 (26%)<br>Bleeding: 2/50 (4%)<br>Urokinase:<br>Complete lysis: 10/50 (20%)<br>≥ 50% lysis: 9/50 (18%)<br>< 50% lysis: 17/50 (34%)<br>No lysis: 11/50 (22%)<br>Bleeding: 1/50 (2%)<br>Systemic SK:<br>Complete lysis: 20/50 (40%)<br>≥ 50% lysis: 7/50 (14%)<br>< 50% lysis: 13/50 (26%)<br>No lysis: 8/50 (16%)<br>Bleeding: 5/50 (10%)<br>PE: 5/50 (10%)<br>Systemic urokinase:<br>Complete lysis: 17/50 (34%)<br>≥ 50% lysis: 10/50 (20%)<br>< 50% lysis: 13/50 (26%)<br>No lysis: 8/50 (16%)<br>Bleeding: 4/50 (8%)<br>PE: 4/50 (8%) |

See Table S1, S2, and S11 legends for expansion of abbreviations.

<sup>a</sup>Four deaths, other causes, two lost to follow-up.

<sup>b</sup>Four deaths, two PEs, two other causes.



**Table S14—[Section 2.10] Systemic Lysis vs No Systemic Lysis for Extensive Acute DVT of the Leg: Methods**

| Author/Year                         | Randomization                                                                                                                                                                                  | Allocation concealment         | Blinding                                                      | Loss to follow-up |
|-------------------------------------|------------------------------------------------------------------------------------------------------------------------------------------------------------------------------------------------|--------------------------------|---------------------------------------------------------------|-------------------|
| Browse et al <sup>52</sup> /1968    | N/A                                                                                                                                                                                            | N/A                            | N/A                                                           | 0                 |
| Robertson et al <sup>53</sup> /1968 | Patients given consecutive code numbers and divided into equal groups of 2—not truly randomized                                                                                                | Labels on SK and heparin coded | Y, data assessors; unclear for patients, caregivers, analysts | 0                 |
| Kakkar et al <sup>54</sup> /1969    | Sequential sealed envelope                                                                                                                                                                     | Adequate                       | Y, patients No, caregivers, assessors, analysts               | 0                 |
| Tsapogas et al <sup>55</sup> /1973  | Sealed envelope                                                                                                                                                                                | Adequate                       | Not blinded                                                   | 0                 |
| Duckert et al <sup>56</sup> /1975   | N/A                                                                                                                                                                                            | N/A                            | N/A                                                           | N/A               |
| Porter et al <sup>57</sup> /1975    | Assigned at random to one of two groups                                                                                                                                                        | N/A                            | N/A                                                           | N/A               |
| Marder et al <sup>58</sup> /1977    | Assigned at random to one of two groups. Five-day follow-up venograms were not performed in 3 of the SK patients, so an additional 3 patients were added to SK group in nonrandomized fashion. | Unclear                        | Not blinded                                                   | 23                |
| Arnesen et al <sup>59</sup> /1978   | Assigned at random to either group by sealed envelope                                                                                                                                          | Adequate                       | Y, radiologic assessors No, patients, caregivers, analysts    | 0                 |
| Elliot et al <sup>60</sup> /1979    | Assigned at random to one of two groups                                                                                                                                                        | Unclear                        | Y, assessors N, patients, caregivers, analysts                | N/A               |
| Watz et al <sup>61</sup> /1979      | N/A                                                                                                                                                                                            | N/A                            | N/A                                                           | N/A               |
| Kiil et al <sup>62</sup> /1981      | Assigned at random to either group                                                                                                                                                             | Unclear                        | Y, assessors, analysts N, patients, caregivers                | 0                 |
| Arnesen et al <sup>63</sup> /1982   | N/A                                                                                                                                                                                            | N/A                            | Evaluator blinded                                             | 7                 |
| Schulman et al <sup>49</sup> /1986  | Assigned at random to either group by sealed envelope                                                                                                                                          | Adequate                       | Single blind                                                  | 0                 |
| Verhaeghe et al <sup>51</sup> /1989 | Assigned at random to one of three groups                                                                                                                                                      | Unclear                        | Y, patients, assessors N, caregivers, analysts                | 0                 |
| Goldhaber et al <sup>64</sup> /1990 | Assigned at random to one of three groups through sealed envelope                                                                                                                              | 2:2:1 allocation scheme        | Not blinded                                                   | 0                 |
| Turpie et al <sup>50</sup> /1990    | Assigned at random to one of two groups in each phase of study                                                                                                                                 | Unclear                        | Y, patients, assessors N, caregivers, analysts                | 37                |
| Schweizer et al <sup>65</sup> /1998 | Assigned at random to one of three groups                                                                                                                                                      | Adequate                       | Y, assessors N, patients, caregivers, analysts                | 1                 |
| Schweizer et al <sup>66</sup> /2000 | Assigned at random to one of five groups                                                                                                                                                       | Unclear                        | Single blind—not sure who                                     | 12                |

Y = yes. See Table S5 and S12 legends for expansion of other abbreviations.

**Table S15—[Section 2.10] Evidence Profile: Systemic Lysis vs No Systemic Lysis for Extensive Acute DVT of the Leg**

| Participants (Studies), Follow-up   | Quality Assessment                   |                          |                                        |                           |                  | Summary of Findings                                                                        |                        |                     |                              |                                              |                                               |
|-------------------------------------|--------------------------------------|--------------------------|----------------------------------------|---------------------------|------------------|--------------------------------------------------------------------------------------------|------------------------|---------------------|------------------------------|----------------------------------------------|-----------------------------------------------|
|                                     | Risk of Bias                         | Inconsistency            | Indirectness                           | Imprecision               | Publication Bias | Overall Quality of Evidence                                                                | Study Event Rates (%)  |                     | Anticipated Absolute Effects |                                              |                                               |
|                                     |                                      |                          |                                        |                           |                  |                                                                                            | With No Systemic Lysis | With Systemic Lysis | Risk With No Systemic Lysis  | Risk Difference With Systemic Lysis (95% CI) |                                               |
| 688 (5 studies), 3 mo <sup>a</sup>  | No serious risk of bias <sup>b</sup> | No serious inconsistency | No serious indirectness <sup>c,d</sup> | Very serious <sup>e</sup> | Undetected       | Mortality (important outcome)<br>Low <sup>b,e</sup> due to imprecision                     | 5/233 (2.1)            | 4/455 (0.9)         | RR 0.86 (0.27-2.68)          | 21 per 1,000                                 | 3 fewer per 1,000 (from 16 fewer to 36 more)  |
| 687 (3 studies), 3 mo <sup>f</sup>  | No serious risk of bias <sup>g</sup> | No serious inconsistency | No serious indirectness <sup>d</sup>   | Very serious <sup>e</sup> | Undetected       | Nonfatal recurrent VTE (critical outcome)<br>Low <sup>d,e,g</sup> due to imprecision       | 2/233 (0.9)            | 10/454 (2.2)        | RR 1.28 (0.25-6.68)          | 48 per 1,000 <sup>h</sup>                    | 13 more per 1,000 (from 36 fewer to 273 more) |
| 688 (10 studies), 3 mo <sup>f</sup> | No serious risk of bias <sup>i</sup> | No serious inconsistency | No serious indirectness <sup>c,d</sup> | Serious                   | Undetected       | Nonfatal major bleeding (critical outcome)<br>Moderate <sup>c,d,i</sup> due to imprecision | 10/234 (4.3)           | 38/454 (8.4)        | RR 1.84 (0.94-3.59)          | 29 per 1,000 <sup>j</sup>                    | 24 more per 1,000 (from 2 fewer to 75 more)   |

(Continued)

**Table S15—Continued**

| Participants (Studies), Follow-up    | Quality Assessment       |                                       |                       |             |                                                         | Summary of Findings         |                        |                     |                            |                                                              |                                              |     |
|--------------------------------------|--------------------------|---------------------------------------|-----------------------|-------------|---------------------------------------------------------|-----------------------------|------------------------|---------------------|----------------------------|--------------------------------------------------------------|----------------------------------------------|-----|
|                                      | Risk of Bias             | Inconsistency                         | Indirectness          | Imprecision | Publication Bias                                        | Overall Quality of Evidence | Study Event Rates (%)  |                     | Relative Effect (95% CI)   |                                                              | Anticipated Absolute Effects                 |     |
|                                      |                          |                                       |                       |             |                                                         |                             | With No Systemic Lysis | With Systemic Lysis | No Systemic Lysis          | Risk With Systemic Lysis                                     | Risk Difference With Systemic Lysis (95% CI) |     |
| 678 (2 studies),<br>2 y <sup>k</sup> | No serious inconsistency | No serious indirectness <sup>h3</sup> | Serious <sup>d4</sup> | Undetected  | Low <sup>d,lo,im</sup> due to risk of bias, imprecision | 24/230 (10.4)               | 27/448 (6)             | RR 0.71 (0.49-1.04) | 588 per 1,000 <sup>o</sup> | 171 fewer per 1,000 (from 300 fewer to 24 more) <sup>o</sup> | ...                                          | ... |
| ...                                  | ...                      | ...                                   | ...                   | ...         | Quality of life not measured                            | ...                         | ...                    | -                   | ...                        | ...                                                          | ...                                          | ... |

Bibliography: Watson et al.<sup>47</sup> We excluded Elsharawy et al<sup>36</sup> from the analysis because it used catheter directed thrombolysis.<sup>36</sup> We identified no studies published since the search date of the systematic review. See Table S1, S10, and S11 legends for expansion of abbreviations.

<sup>a</sup>Range of follow-up in included studies, 1 to 72 mo.

<sup>b</sup>Allocation concealed in three of five studies. Follow-up inadequate in one of five (Common et al<sup>48</sup>). Excluding this study from the analysis does not change the effect estimate. All studies had blinded outcome assessors. None of the studies used a placebo control.

<sup>c</sup>The population of one study (Schulman et al<sup>49</sup>) consisted of patients with calf vein thrombosis.

<sup>d</sup>Interventions varied across studies with regard to agent (eg, tPA, SK, urokinase), dose, use of the pedal vein administration, duration of treatment, and concomitant drugs (eg, steroids). However, we did not downgrade for indirectness given that there is no standard regimen, and all analyses showed no heterogeneity in results.

<sup>e</sup>CI included both no effect and a potentially significant effect.

<sup>f</sup>Range of follow-up in included studies, 1 to 30 d.

<sup>g</sup>Allocation concealed in two of three studies. Follow-up adequate in all studies. All studies had blinded outcome assessors. None of the studies used a placebo control.

<sup>h</sup>Baseline risks for nonfatal recurrent VTE and for major bleeding derived from Douketis et al.<sup>39</sup>Allocation concealed in seven of 10 studies. Follow-up inadequate in one 10 studies (Common et al<sup>48</sup>). Excluding this study from the analysis does not affect the effect estimate. All studies had blinded outcome assessors. Two studies used placebo (Turpie et al,<sup>39</sup>Verhaeghe et al<sup>51</sup>).

<sup>i</sup>Only 4% of all major bleeding events were intracranial bleeds.

<sup>k</sup>Range of follow-up in included studies: 1 to 6 y.

<sup>l</sup>Allocation concealed in two of two studies. Follow-up adequate in all studies. All studies had blinded outcome assessors. None of the studies used placebo control.

<sup>m</sup>No use of a standardized validated tool reported.

<sup>n</sup>This estimate is based on the findings of the VETO (Venous Thrombosis Outcomes) study.<sup>40</sup>This probably underestimates PTS baseline risk given that overall, 52% of patients reported the current use of compression stockings during study follow-up.

<sup>o</sup>Severe PTS: assuming the same RR of 0.71 and a baseline risk of 13.8%,<sup>40</sup> the absolute reduction is 40 fewer severe PTS per 1,000 (from 70 fewer to 6 more) over 2 y.

**Table S16—[2.11] Evidence Profile: Surgical Thrombectomy Vs No Surgical Thrombectomy for Extensive Acute DVT of the Leg<sup>a</sup>**

| Participants (Studies), Follow-up | Quality Assessment   |                          |                                      |                           |                  | Summary of Findings                                                                              |                            |                               |                                             |                                                                               |
|-----------------------------------|----------------------|--------------------------|--------------------------------------|---------------------------|------------------|--------------------------------------------------------------------------------------------------|----------------------------|-------------------------------|---------------------------------------------|-------------------------------------------------------------------------------|
|                                   | Risk of Bias         | Inconsistency            | Indirectness                         | Imprecision               | Publication Bias | Overall Quality of Evidence                                                                      | Study Event Rates (%)      |                               | Anticipated Absolute Effects                |                                                                               |
|                                   |                      |                          |                                      |                           |                  |                                                                                                  | With Surgical Thrombectomy | With No Surgical Thrombectomy | Risk With No Surgical Thrombectomy (95% CI) | Risk Difference With Surgical Thrombectomy (95% CI)                           |
| ...                               | ...                  | ...                      | ...                                  | ...                       | ...              | Mortality not reported                                                                           | ...                        | ...                           | ...                                         | ...                                                                           |
| 51 (1 study), 3 mo                | Serious <sup>b</sup> | No serious inconsistency | No serious indirectness <sup>c</sup> | Very serious <sup>c</sup> | Undetected       | Nonfatal recurrent VTE (critical outcome)<br>Low <sup>b,c</sup> due to risk of bias, imprecision | 1/27 (3.7) <sup>d</sup>    | 0/24 (0)                      | RR 0.37 (0.02-8.75)                         | 48 per 1,000 <sup>b,e</sup><br>30 fewer per 1,000 (from 47 fewer to 372 more) |
| 51 (1 study), 3 mo                | Serious <sup>b</sup> | No serious inconsistency | No serious indirectness              | Very serious <sup>c</sup> | Undetected       | Nonfatal major bleeding (critical outcome)<br>See comment                                        | 0/27 (0)                   | 0/24 (0) <sup>f</sup>         | Not estimable                               | See comment                                                                   |
| 51 (1 study), 2 y                 | Serious <sup>g</sup> | No serious inconsistency | No serious indirectness              | Serious <sup>h</sup>      | Undetected       | PTS (critical outcome)<br>Low <sup>g,h</sup> due to risk of bias, imprecision                    | 25/27 (92.6)               | 14/24 (58.3)                  | RR 0.63 (0.44-0.9) <sup>i</sup>             | 218 fewer per 1,000 (from 59 fewer to 329 fewer) <sup>h</sup>                 |
| ...                               | ...                  | ...                      | ...                                  | ...                       | ...              | Quality of life not measured                                                                     | ...                        | ...                           | ...                                         | ...                                                                           |

Bibliography: Plate et al.<sup>67</sup> See Table S1, S5, and S10 legends for expansion of abbreviations.

<sup>a</sup>The study included patients with DVT with symptoms of leg swelling not exceeding 7 d and a proximal extension of the thrombus above the inguinal ligament, but not into the vena cava.

<sup>b</sup>No clear whether allocation was concealed. No blinding reported. Not clear whether analysis was ITT. Follow-up rate 88% at 6 mo. Study not stopped early for benefit.

<sup>c</sup>CI includes values suggesting either harm or benefit.

<sup>d</sup>One event, which was a symptomatic PE.

<sup>e</sup>Baseline risks for nonfatal recurrent VTE derived from Douketis et al.<sup>39</sup>

<sup>f</sup>No severe bleeding complications were recorded in either group. Three patients in thrombectomy group developed local wound hematoma.

<sup>g</sup>In addition to other study limitations, this outcome was assessed by those who did the surgery and anticoagulation. No standardized tool was used. One surgical patient had an amputation secondary to venous gangrene and was not counted in the PTS assessment.

<sup>h</sup>Few number of events. This warrants rating down the quality of evidence by a second level when considered along with study limitations.

<sup>i</sup>The RR is based on the 6-mo data.

<sup>j</sup>This estimate is based on the findings of the VETO (Venous Thrombosis Outcomes study.<sup>40</sup> This probably underestimates PTS baseline risk given that overall, 52% of patients reported the current use of compression stockings during study follow-up.

<sup>k</sup>Severe PTS; assuming the same RR of 0.63 and a baseline risk of 13.8% over 2 y,<sup>40</sup> the absolute reduction is 51 fewer severe PTS per 1,000 (from 14 fewer to 77 fewer) over 2 y.

**Table S17—[Section 2.11] Surgical Thrombectomy vs No Surgical Thrombectomy for Extensive Acute DVT of the Leg: Clinical Description and Results (All Randomized Trials and Prospective Observational Studies of at Least 20 Patients)**

| Author/Year                         | Type of Publication                                     | Participants                                                                                                 | Interventions                                                                                                                                                                                                                              | Outcomes                                                   | Follow-up   | Results                                                                                                                                                                                                                                                                                                                |
|-------------------------------------|---------------------------------------------------------|--------------------------------------------------------------------------------------------------------------|--------------------------------------------------------------------------------------------------------------------------------------------------------------------------------------------------------------------------------------------|------------------------------------------------------------|-------------|------------------------------------------------------------------------------------------------------------------------------------------------------------------------------------------------------------------------------------------------------------------------------------------------------------------------|
| Plate et al <sup>67</sup> /1984     | RCT, multicenter                                        | 58 patients with acute iliofemoral venous thrombosis                                                         | Medical: 5,000-unit bolus heparin followed by 500 units/kg per 24 h adjusted to aPTT, and oral anticoagulation (31 patients)<br><br>Surgical: operative venous thrombectomy with temporary AVF plus anticoagulation as above (27 patients) | PTS sequelae: iliofemoral patency, valve competence        | 6 mo        | Medical:<br>PTS sequelae: 25/27 (93%)<br>Ilioformal patency: 9/26 (35%)<br>Valve competence: 7/27 (26%)<br>(PE in 1 patient)<br><br>Surgical:<br>PTS sequelae: 14/24 (58%, $P < .005$ )<br>Ilioformal patency: 16/21 (76%, $P < .025$ )<br>Valve competence: 13/23, (52% $P < .05$ )<br>(venous gangrene in 1 patient) |
| Einarsson et al <sup>68</sup> /1986 | Prospective registry                                    | 70 patients (71 legs) with iliofemoral DVT (age of clot mean, 3 d)                                           | Ilioformal venous thrombectomy with temporary AVF closed at 6-8 wk, heparin preoperatively and postoperatively plus warfarin postoperatively                                                                                               | Venous patency, hematoma, AVF patency, PE, wound infection | 56 d (mean) | Patent iliac vein: 88%<br>Hematoma: 11%<br>AVF patency: 86%<br>PE: 4%<br>Wound infection: 26%;                                                                                                                                                                                                                         |
| Einarsson et al <sup>69</sup> /1986 |                                                         | 57 patients (58 limbs) with prior operative venous thrombectomy and AVF closed at 6-8 wk for iliofemoral DVT | Clinical PTS, venography, venous pressure, venous plethysmography, foot volumetry                                                                                                                                                          | Venous insufficiency: Good, fair, poor                     | 9-10 mo     | Venous insufficiency:<br>Good: 75%<br>Fair: 20%<br>Poor: 5%<br><br>Venography (iliofemoral):<br>Normal: 61%<br>Postthrombotic: 23%<br>Occluded: 39%<br>IV pressure:<br>Normal: 82%<br>Abnormal: 18%<br>Plethysmography:<br>Normal: 29%<br>Abnormal: 71%<br>Foot volumetry:<br>Normal: 29%<br>Abnormal: 71%             |
| Plate et al <sup>70</sup> /1990     | Five-year follow-up to RCT (Plate, 1984 <sup>67</sup> ) | 41/58 patients (22 medical, 19 surgical) available for evaluation at 5 y                                     | Prior treatment: Medical: anticoagulation alone vs Surgical: operative venous thrombectomy plus anticoagulation                                                                                                                            | PTS sequelae, iliac patency, venous pressure               | 5 y         | Medical:<br>PTS sequelae: 6/22 (27%)<br>Iliac patency: 11/22 (50%)<br>Venous pressure: 60 mm Hg (mean)                                                                                                                                                                                                                 |

(Continued)

**Table S17—Continued**

| Author/Year                      | Type of Publication                                        | Participants                                                                        | Interventions                                                                                                                                                                                                              | Outcomes                                                                            | Follow-up    | Results                                                                                                                                                                                                                                                                                                                                                                                                                                                                                                                          |
|----------------------------------|------------------------------------------------------------|-------------------------------------------------------------------------------------|----------------------------------------------------------------------------------------------------------------------------------------------------------------------------------------------------------------------------|-------------------------------------------------------------------------------------|--------------|----------------------------------------------------------------------------------------------------------------------------------------------------------------------------------------------------------------------------------------------------------------------------------------------------------------------------------------------------------------------------------------------------------------------------------------------------------------------------------------------------------------------------------|
| Neglen et al <sup>71</sup> /1991 | Prospective registry                                       | 48 patients with iliofemoral DVT of 1-14 d                                          | Operative venous thrombectomy with temporary AVF (closed 6-12 wk postoperative)                                                                                                                                            | Patency, PE, clinical symptoms, normal photoplethysmography, successful AVF closure | 24 mo (mean) | <p>Surgical:</p> <p>PTS sequelae: 2/19 (11%)<br/>                     Iliac patency: 15/19 (78%)<br/>                     Venous pressure: 43 mm Hg (mean, <math>P &lt; .05</math>)</p> <p>Patency:<br/>                     Iliofemoral: 88%<br/>                     Popliteal: 94%<br/>                     PE: 16% symptomatic, 31% asymptomatic<br/>                     Symptom-free: 81%<br/>                     Normal photoplethysmography (no reflux): 56%<br/>                     AVF closure success rate: 87%</p> |
| Plate et al <sup>72</sup> /1997  | Ten-year follow-up to RCT (Plate, 1984 [10] and 1990 [20]) | 30/58 patients (17 from medical arm, 13 from surgical arm) available for evaluation | <p>Adjunctive therapy: transvenous percutaneous dilatation of severe iliac stenosis (3 patients)</p> <p>Prior treatment Medical: anticoagulation alone vs Surgical: operative venous thrombectomy plus anticoagulation</p> | PTS sequelae, iliac patency, venous pressure                                        | 10 y         | <p>Medical:</p> <p>PTS sequelae: 15/17 (88%)<br/>                     Iliac patency: 7/17 (41%)<br/>                     Venous pressure: 63 mm Hg (mean)</p> <p>Surgical:</p> <p>PTS sequelae: 7/13 (54%)<br/>                     Iliac patency: 10/12 (83%)<br/>                     Venous pressure: 55 mm Hg (mean)</p>                                                                                                                                                                                                     |

Early prospective observational studies with <20 patients and retrospective studies are described in Table 5 of the eighth edition of these guidelines.<sup>46</sup> See Table S1, S2, S4, S10, and S11 legends for expansion of abbreviations.

**Table S18—[Section 2.11 ] Surgical Thrombectomy vs No Surgical Thrombectomy for Extensive Acute DVT of the Leg: Methodologic Quality**

| Author/Year                         | Randomization | Allocation Concealment | Blinding                                              | Loss to Follow-up |
|-------------------------------------|---------------|------------------------|-------------------------------------------------------|-------------------|
| Plate et al <sup>67</sup> /1984     | ND            | PN                     | N, patients, caregivers, assessors, and data analysts | 7                 |
| Einarsson et al <sup>68</sup> /1986 | N/A           | N/A                    | N/A                                                   | N/A               |
| Einarsson et al <sup>69</sup> /1986 | N/A           | N/A                    | N/A                                                   | N/A               |
| Plate et al <sup>70</sup> /1990     | N/A           | N/A                    | N/A                                                   | 17                |
| Neglén et al <sup>71</sup> /1991    | N/A           | N/A                    | N/A                                                   | N/A               |
| Plate et al <sup>72</sup> /1997     | N/A           | N/A                    | N/A                                                   | 28                |

See Table S5 and S12 legends for expansion of abbreviations.

**Table S19—[Section 2.13] Evidence Profile: Vena Cava Filter vs No Vena Cava Filter for Acute Proximal DVT of the Leg Treated With Anticoagulation<sup>a,b</sup>**

| Participants (Studies), Follow-up | Quality Assessment                   |                          |                         |                      | Summary of Findings                                                                         |                        |                           |                                  |                                |                                                 |
|-----------------------------------|--------------------------------------|--------------------------|-------------------------|----------------------|---------------------------------------------------------------------------------------------|------------------------|---------------------------|----------------------------------|--------------------------------|-------------------------------------------------|
|                                   | Risk of Bias                         | Inconsistency            | Indirectness            | Imprecision          | Publication Bias of Evidence                                                                | Study Event Rates (%)  |                           | Anticipated Absolute Effects     |                                |                                                 |
|                                   |                                      |                          |                         |                      |                                                                                             | With Vena Cava Filters | With No Vena Cava Filters | Relative Effect (95% CI)         | Risk With No Vena Cava Filters | Risk Difference With Vena Cava Filters (95% CI) |
| 400 (1 study), 8 y                | No serious risk of bias <sup>c</sup> | No serious inconsistency | No serious indirectness | Serious <sup>d</sup> | Mortality (important outcome)<br>Undetected Moderate <sup>e,d</sup> due to imprecision      | 103/200 (51.5)         | 98/200 (49.0)             | RR 0.95 (0.78-1.16) <sup>e</sup> | 515 per 1,000                  | 26 fewer per 1,000 (from 113 fewer to 82 more)  |
| 304 (1 study), 8 y                | No serious risk of bias <sup>c</sup> | No serious inconsistency | No serious indirectness | Serious <sup>f</sup> | Symptomatic PE (critical outcome)<br>Undetected Moderate <sup>e,d</sup> due to imprecision  | 24/159 (15.1)          | 9/145 (6.2)               | RR 0.41 (0.2-0.86) <sup>g</sup>  | 151 per 1,000                  | 89 fewer per 1,000 (from 21 fewer to 121 fewer) |
| 310 (1 study), 8 y                | No serious risk of bias <sup>c</sup> | No serious inconsistency | No serious indirectness | Serious <sup>f</sup> | Recurrent DVT (important outcome)<br>Undetected Moderate <sup>e,d</sup> due to imprecision  | 41/150 (27.3)          | 57/160 (35.6)             | RR 1.3 (0.93-1.82) <sup>h</sup>  | 273 per 1,000                  | 82 more per 1,000 (from 19 fewer to 224 more)   |
| 337 (1 study), 8 y                | No serious risk of bias <sup>c</sup> | No serious inconsistency | No serious indirectness | Serious <sup>d</sup> | Major bleeding (important outcome)<br>Undetected Moderate <sup>e,d</sup> due to imprecision | 31/168 (18.5)          | 26/169 (15.4)             | RR 0.83 (0.52-1.34) <sup>i</sup> | 185 per 1,000                  | 31 fewer per 1,000 (from 89 fewer to 63 more)   |

(Continued)



**Table 19—Continued**

| Participants (Studies), Follow-up | Quality Assessment                               |                          |                         |                      |                  | Summary of Findings                                                                       |                           |                          |                              |                                |                                                 |
|-----------------------------------|--------------------------------------------------|--------------------------|-------------------------|----------------------|------------------|-------------------------------------------------------------------------------------------|---------------------------|--------------------------|------------------------------|--------------------------------|-------------------------------------------------|
|                                   | Risk of Bias                                     | Inconsistency            | Indirectness            | Imprecision          | Publication Bias | Study Event Rates (%)                                                                     |                           | Relative Effect (95% CI) | Anticipated Absolute Effects |                                |                                                 |
|                                   |                                                  |                          |                         |                      |                  | Overall Quality of Evidence                                                               | With No Vena Cava Filters |                          | With Vena Cava Filters       | Risk With No Vena Cava Filters | Risk Difference With Vena Cava Filters (95% CI) |
| 308 (1 study), 8 y                | Serious <sup>i</sup><br>No serious inconsistency | No serious inconsistency | No serious indirectness | Serious <sup>d</sup> | Undetected       | PTS (important outcome)<br>Undetected Low <sup>h,i</sup> due to risk of bias, imprecision | 107/153 (69.9)            | 109/155 (70.3)           | RR 0.87 (0.66-1.13)          | 699 per 1,000                  | 91 fewer per 1,000 (from 238 fewer to 91 more)  |
| 379 (1 study), 2 y                | No serious risk of bias                          | No serious inconsistency | No serious indirectness | Serious <sup>f</sup> | Undetected       | Complications (important outcome)<br>Moderate <sup>e</sup> due to imprecision             | 0/186 (0)                 | 0/193 (0)                | ...                          | ...                            | ... <sup>k</sup>                                |
| ...                               | ...                                              | ...                      | ...                     | ...                  | ...              | Quality of life not reported                                                              | ...                       | ...                      | -                            | ...                            | ...                                             |

Bibliography: Decousus et al.<sup>8</sup> The PREPIC Investigators.<sup>73</sup> See Table S1, S2, S5, and S10 legends for expansion of abbreviations.

<sup>a</sup>Four types of permanent vena cava filters were used: Vena Tech LGM (B. Braun Melsugen AG), titanium Greenfield (Boston Scientific Corporation), Cardial (C.R. Bard, Inc), and Bird's Nest (Cook Group Incorporated).

<sup>b</sup>Anticoagulation consisted of LMWH or UFH initially (according to a 2 × 2 factorial design) followed by oral anticoagulation for at least 3 mo.

<sup>c</sup>Allocation concealed. Data collectors and outcome adjudicators blinded. ITT analysis. Data missing for 4% at 2 y and 1% at 8 y. Enrollment was stopped at 400 instead of targeted 800 due to slow recruitment.

<sup>d</sup>CI includes both negligible effect and appreciable benefit or appreciable harm.

<sup>e</sup>RR, 1.0 (95% CI, 0.29-3.4) at 12 d; RR, 1.08 (95% CI, 0.73-1.58) at 2 y.

<sup>f</sup>Small number of events.

<sup>g</sup>RR, 0.23 (95% CI, 0.05-1.05) at 12 d (both symptomatic and asymptomatic PE), RR, 0.54 (95% CI, 0.21-1.41) at 2 y (symptomatic PE)

<sup>h</sup>RR, 1.78 (95% CI, 1.09-2.94) at 2 y.

<sup>i</sup>RR, 1.5 (95% CI, 0.54-4.14) at 12 d. RR, 0.74 (95% CI, 0.41-1.36) at 2 y.

<sup>j</sup>No standardized validated tool used to measure PTS.

<sup>k</sup>No complications directly related to the filter or its insertion reported in the PREPIC (Prevention du Risque d'Embolie Pulmonaire par Interruption Cave) trial.<sup>8</sup> Mismetti et al<sup>74</sup> (prospective study) reported an incidence of 3.2% (excluding filter tilting and puncture site hematoma) among 220 patients receiving retrievable vena cava filter for secondary prevention of VTE, whereas while Athanasoulis et al<sup>75</sup> (retrospective study) reported an incidence of 0.3% for major complications among 1,731 patients receiving vena cava filters predominantly for secondary prevention of VTE.

**Table S20—[Section 2.14] Evidence Profile: Early Ambulation vs Delayed Ambulation for Acute DVT of the Leg<sup>a,b</sup>**

| Participants (Studies), Follow-up                                                                                                                                | Quality Assessment       |                                      |                           |             | Summary of Findings                                  |                             |                         |                              |                          |                                                 |
|------------------------------------------------------------------------------------------------------------------------------------------------------------------|--------------------------|--------------------------------------|---------------------------|-------------|------------------------------------------------------|-----------------------------|-------------------------|------------------------------|--------------------------|-------------------------------------------------|
|                                                                                                                                                                  | Risk of Bias             | Inconsistency                        | Indirectness              | Imprecision | Publication Bias                                     | Study Event Rates (%)       |                         | Anticipated Absolute Effects |                          |                                                 |
|                                                                                                                                                                  |                          |                                      |                           |             |                                                      | Overall Quality of Evidence | With Delayed Ambulation | With Early Ambulation        | Relative Effect (95% CI) | Risk With Delayed Ambulation                    |
| 385 (4 studies), 3 mo <sup>c</sup>                                                                                                                               | No serious inconsistency | No serious indirectness              | Very serious <sup>e</sup> | Undetected  | Low <sup>d,e</sup> due to risk of bias, imprecision  | 2/186 (1.1)                 | 3/199 (1.5)             | RR 1.3 (0.23-7.55)           | 11 per 1,000             | 3 more per 1,000 (from 8 fewer to 70 more)      |
| 385 (4 studies), 4-12 d                                                                                                                                          | No serious inconsistency | No serious indirectness <sup>f</sup> | Serious <sup>e</sup>      | Undetected  | Low <sup>d,g</sup> due to risk of bias, imprecision  | 22/186 (11.8)               | 27/199 (13.6)           | RR 1.16 (0.66-2.05)          | 118 per 1,000            | 19 more per 1,000 (from 40 fewer to 124 more)   |
| Quality of life (important outcome; measured with quality of life questionnaire in chronic limb venous insufficiency [CLVIQ]); better indicated by lower values) |                          |                                      |                           |             |                                                      |                             |                         |                              |                          |                                                 |
| 53 (1 study), 2 y                                                                                                                                                | No serious inconsistency | Serious <sup>h</sup>                 | No serious imprecision    | Undetected  | Low <sup>d,i</sup> due to risk of bias, indirectness | 17                          | 36                      | -                            |                          | See footnote)                                   |
| PTS (important outcome; assessed with Villata-Prandoni score [value > 5])                                                                                        |                          |                                      |                           |             |                                                      |                             |                         |                              |                          |                                                 |
| 37 (1 study) 2 y                                                                                                                                                 | No serious inconsistency | No serious indirectness              | Serious <sup>e</sup>      | Undetected  | Low <sup>e,h</sup> due to risk of bias, imprecision  | 9/11 (81.8)                 | 14/26 (53.8)            | RR 0.66 (0.42-1.03)          | 400 per 1,000            | 136 fewer per 1,000 (from 232 fewer to 12 more) |

Bibliography: Kahn et al.<sup>76</sup> Aissaoui et al.<sup>77</sup> Included studies.<sup>78,82</sup> See Table S1, S2, S5, and S10 legends expansion of other abbreviations.

<sup>a</sup>In two of four eligible trials, all patients received early compression therapy (bandages or stockings). In the two other trials, only patients randomized to early ambulation received early compression therapy.

<sup>b</sup>Two of four eligible studies excluded patients with symptomatic PE; in the third study, 24% of participants had symptomatic PE at baseline. It was not clear whether the fourth study excluded patients with symptomatic PE.

<sup>c</sup>Three studies reporting acute phase mortality reported no deaths.

<sup>d</sup>Concealment of allocation reported in one of four studies; blinding of outcome assessors reported in two of four studies; ITT analysis reported in two of four studies. Follow-up 97%-100%. In two of four trials, only patients randomized to early ambulation received early compression therapy (bandages or stockings). In the two other trials, all patients received early compression therapy.

<sup>e</sup>CI includes both values of clinically significant benefit and values of clinically significant harms.

<sup>f</sup>PE assessed as both symptomatic and asymptomatic PE.

<sup>g</sup>Funnel plot reported as not asymmetrical by Aissaoui et al.<sup>77</sup>

<sup>h</sup>Concealment of allocation not reported, outcome assessors not blinded for this outcome; 70% follow-up rate; compression stockings used on patients with early mobilization but in patients with delayed mobilization.

<sup>i</sup>No explanation was provided.

<sup>j</sup>Psychologic and overall somatic quality of life did not differ significantly between the treatment groups, whereas DVT-related items, especially those reflecting the ease of locomotion, showed significantly greater improvement with compression than with bed rest ( $P < .001$  for bandages,  $P < .05$  for stockings).

**Table S21—[Section 2.14] Early Ambulation vs Delayed Ambulation for Acute DVT of the Leg: Clinical Description and Results**

| Author/Year                          | Type of Publication | Participants                                 | Interventions                                                                                                                                                                                                                          | Outcomes                                                                                                                                     | Follow-up | Results                                                                                                                                                                                                                                               |
|--------------------------------------|---------------------|----------------------------------------------|----------------------------------------------------------------------------------------------------------------------------------------------------------------------------------------------------------------------------------------|----------------------------------------------------------------------------------------------------------------------------------------------|-----------|-------------------------------------------------------------------------------------------------------------------------------------------------------------------------------------------------------------------------------------------------------|
| Schellong et al <sup>82</sup> /1999  | RCT, single center  | 126 patients with acute proximal DVT         | Ambulation: leg elevation until day 2, then ambulation and compression (64 patients)<br>Bed rest for 8 d with leg elevation and compression (62 patients)                                                                              | PE by $\dot{V}/\dot{Q}$ scan                                                                                                                 | 10 d      | Ambulation: PE: 10/59 (17%)<br><br>Bed Rest: PE: 14/63 (22%)                                                                                                                                                                                          |
| Partsch et al <sup>81</sup> /2000    | RCT, multicenter    | 45 patients with proximal DVT <14 d duration | Ambulation + bandages: inelastic Unna boot bandages plus walking exercises (15 patients)<br>Ambulation + stockings: elastic compression stockings plus walking exercises (15 patients)<br>Bed rest, no compression, LMWH (15 patients) | Walking distance, pain levels, leg circumference, clinical scores, PE, side effects                                                          | 9 d       | Summary results between groups: Walking distance, pain, leg circumference and clinical scores significantly improved in groups A and B compared with group C<br><br>PE, group A: 2/15 (13%)<br>PE, group B: 1/15 (7%)<br>PE, group C: 1/15 (7%)       |
| Aschwanden et al <sup>79</sup> /2001 | RCT, single center  | 129 patients with acute DVT                  | Ambulation $\geq$ 4 h/d for 4 d under supervision, LMWH (69 patients)<br>Bed rest for 4 d (60 patients)                                                                                                                                | New PE between baseline and day 4 by $\dot{V}/\dot{Q}$ scan                                                                                  | 3 mo      | Ambulation: PE: 10/69 (14%)<br><br>Bed rest: PE: 6/60 (10%)<br>Note: new PEs were asymptomatic; 12/16 patients had baseline PEs                                                                                                                       |
| Partsch et al <sup>83</sup> /2001    | Prospective study   | 1,289 patients with acute DVT                | All treated with LMWH, compression, and immediate ambulation                                                                                                                                                                           | PE on $\dot{V}/\dot{Q}$ scan at admission and after 10 d of treatment,                                                                       | 10 d      | PE at admission: 629/1,270 (50%) PE at 10 d: 77/1,256 (61%)<br>Note: initial lung scans were performed in 1,270/1,289 patients; follow-up scans were performed in 1,256/1,289 patients                                                                |
| Blättler et al <sup>78</sup> /2003   | RCT                 | 53 patients with proximal DVT                | Ambulation + bandages: firm inelastic bandages, ambulation (18 patients)<br>Ambulation + stockings: elastic compression stockings, ambulation (18 patients)                                                                            | Walking distance, well-being, and DVT-related quality of life, leg pain by visual analog scale, edema, clinical scores, thrombus progression | 9 d       | Well-being/quality of life: Improved with stockings ( $P < .05$ ), bandages ( $P < .01$ )<br>Leg pain: Decreased faster during first 4 d w/ bandages and stockings vs bed rest ( $P < .01$ ); near absence of pain at 9 d achieved with bandages only |

(Continued)

Table S21—Continued

| Author/Year                               | Type of Publication                            | Participants                                                  | Interventions                                                                                                                                                                                                                              | Outcomes                                                                                                                                  | Follow-up | Results                                                                                                                                                                                                                                                                                                    |
|-------------------------------------------|------------------------------------------------|---------------------------------------------------------------|--------------------------------------------------------------------------------------------------------------------------------------------------------------------------------------------------------------------------------------------|-------------------------------------------------------------------------------------------------------------------------------------------|-----------|------------------------------------------------------------------------------------------------------------------------------------------------------------------------------------------------------------------------------------------------------------------------------------------------------------|
|                                           |                                                |                                                               | Bed rest only (17 patients)                                                                                                                                                                                                                |                                                                                                                                           |           | Edema: Marked reduction in leg size with bandages and stockings vs bed rest ( $P < .001$ )<br>Clinical scores: Improved with bandages and stockings vs bed rest ( $P < .001$ )<br>Thrombus progression: Improved with bandages and stockings vs bed rest ( $P < .01$ )<br>PE: No difference between groups |
| Partsch et al <sup>84</sup> /2004         | 2-y follow-up to RCT (77)                      | 37 patients followed up 2 y post-RCT                          | Anticoagulation and bed rest vs anticoagulation and ambulation with compression bandages or stockings                                                                                                                                      | PTS assessment (Villalta-Prandoni scale)<br><br>Pain assessment by visual analog scale and modified Lowenberg test<br>Thrombus regression | 2 y       | PTS scores: Ambulatory group (mean score, 5.1) had improved outcome vs bed rest group (mean score, 8.2; $P < .01$ )<br><br>Pain: Lower pain levels in mobile group vs bed rest (ns)<br><br>Thrombus extension: No difference in thrombus regression of thrombus remnants between groups                    |
| Trujillo-Santos et al <sup>85</sup> /2005 | Prospective study                              | 2,650 patients with acute DVT (2,038 [77%]) or PE (612 [23%]) | DVT group, bed rest or ambulation: 1,050 (52%) patients received bed rest, and 988 (48%) ambulated. All received LMWH. PE group, bed rest or ambulation: 385 (63%) patients received bed rest, and 227 (37%) ambulated. All received LMWH. | Symptomatic, confirmed PE during first 15 d of therapy                                                                                    | 3 mo      | DVT group, bed rest: PE: 7/1050 (0.7%)<br>DVT group, ambulate: PE: 4/988 (0.4%)<br>PE group, bed rest: PE: 2/385 (0.5%)<br>PE group, ambulate: PE: 2/227 (0.9%)                                                                                                                                            |
| Jünger et al <sup>80</sup> /2006          | RCT, multicenter open design stratified by age | 103 patients with proximal DVT                                | Bed rest: 50 patients received 5 d of strict bed rest, LMWH, compression bandages.<br>Ambulation: 52 patients ambulated for 5 d, LMWH, compression bandages                                                                                | PE, progression of or new thrombosis, infection or serious adverse event                                                                  | 5 d       | New PE bed rest: 8/50 (16%) ambulation: 2/52 (4%)<br><br>Primary target variable: Bed rest: 14/50 (28%)<br>Ambulation: 7/52 (13%)                                                                                                                                                                          |

ns = not significant;  $\dot{V}Q$  = ventilation/perfusion. See Table S2, S5, and S10 legends for expansion of other abbreviations.

**Table S22—[Section 2.14] Early Ambulation vs Delayed Ambulation for Acute DVT of the Leg: Methodologic Quality**

| Author/Year                               | Randomization                                                 | Allocation Concealment | Blinding                                       | Loss to Follow-up |
|-------------------------------------------|---------------------------------------------------------------|------------------------|------------------------------------------------|-------------------|
| Schellong et al <sup>82</sup> /1999       | Patients randomized to 1 of 2 study groups                    | Unclear                | Y, assessors N, patients, caregivers, analysts | 4                 |
| Partsch et al <sup>81</sup> /2000         | Patients randomized to 1 of 3 study groups by sealed envelope | Unclear                | Y, assessors N, patients, caregivers, analysts | 0                 |
| Aschwanden et al <sup>78</sup> /2001      | Patients randomized to 1 of 2 study groups                    | Sealed envelope        | Not blinded                                    | 5                 |
| Partsch et al <sup>83</sup> /2000         | N/A                                                           | N/A                    | N/A                                            | N/A               |
| Blättler et al <sup>79</sup> /2003        | Patients randomized to 1 of 3 study groups by sealed envelope | Not specified          | Y, assessors N, patients, caregivers, analysts | 0                 |
| Partsch et al <sup>84</sup> /2004         | N/A                                                           | N/A                    | N/A                                            | 21                |
| Trujillo-Santos et al <sup>85</sup> /2005 | N/A                                                           | N/A                    | N/A                                            | N/A               |
| Jünger et al <sup>80</sup> /2006          | Patients randomized to 1 of 2 study groups by sealed envelope | Unclear                | Y, analysts N, patients, caregivers, assessors |                   |

See Table S5 and S12 legends for expansion of abbreviations.

**Table S23—[Sections 3.1.1-3.1.4] Evidence Profile: Four or Six Weeks vs Three or Six Months as Minimum Duration of Anticoagulation for VTE<sup>a,b</sup>**

| Participants (Studies), Follow up     | Quality Assessment                   |                                       |                         |                                     |                  | Summary of Findings         |                       |                                                |                              |                                                                         |                                              |
|---------------------------------------|--------------------------------------|---------------------------------------|-------------------------|-------------------------------------|------------------|-----------------------------|-----------------------|------------------------------------------------|------------------------------|-------------------------------------------------------------------------|----------------------------------------------|
|                                       | Risk of Bias                         | Inconsistency                         | Indirectness            | Imprecision                         | Publication Bias | Overall quality of Evidence | Study Event Rates (%) |                                                | Anticipated Absolute Effects |                                                                         |                                              |
|                                       |                                      |                                       |                         |                                     |                  |                             | With Control          | With 4 or 6 wk vs 3 or 6 mo of Anticoagulation | Risk With Control            | Risk Difference With 4 or 6 wk vs 3 or 6 mo of Anticoagulation (95% CI) |                                              |
| 2,185 (5 studies), 1-2 y <sup>d</sup> | No serious risk of bias <sup>e</sup> | No serious inconsistency <sup>f</sup> | No serious indirectness | No serious imprecision <sup>g</sup> | Undetected       | High <sup>h</sup>           | 70/1,090 (6.4)        | 127/1,095 (11.6)                               | RR 1.83 (1.39-2.42)          | 64 per 1,000                                                            | 53 more per 1,000 (from 25 more to 91 more)  |
| 2,185 (5 studies), 1-2 y <sup>d</sup> | No serious risk of bias              | No serious inconsistency <sup>f</sup> | No serious indirectness | No serious imprecision              | Undetected       | High <sup>h</sup>           | 13/1,090 (1.2)        | 7/1,095 (0.6)                                  | RR 0.54 (0.22-1.32)          | 12 per 1,000                                                            | 5 fewer per 1,000 (from 9 fewer to 4 more)   |
| 2,098 (5 studies), 1-2 y <sup>d</sup> | No serious risk of bias <sup>e</sup> | No serious inconsistency <sup>f</sup> | No serious indirectness | No serious imprecision <sup>h</sup> | Undetected       | High <sup>e,th</sup>        | 55/998 (5.5)          | 57/1,100 (5.2)                                 | RR 0.97 (0.68-1.38)          | 55 per 1,000                                                            | 2 fewer per 1,000 (from 18 fewer to 21 more) |

Bibliography: Kearon et al.<sup>86</sup> Pinede et al.<sup>87</sup> Schulman et al.<sup>87</sup> Schulman et al.,<sup>88</sup> Levine et al.,<sup>89</sup> British Thoracic Society.<sup>90</sup> See Table S1, S5, and S2 legends for expansion of abbreviations.

<sup>a</sup>Short vs longer duration of anticoagulation was 6 wk vs 6 mo for Schulman et al, 6 wk vs 3 mo for Pinede et al, and 4 wk vs 3 mo for the other three studies.

<sup>b</sup>Populations varied among studies: first provoked isolated distal DVT, proximal DVT or PE provoked in Kearon et al; first isolated distal DVT in Pinede et al; first isolated distal DVT, proximal DVT, or PE in Schulman et al; proximal DVT (21% had cancer) in Levine et al; and DVT or PE (29% not objectively confirmed) in British Thoracic Society.

<sup>c</sup>Timing of randomization relative to the start of treatment varied across studies: Pinede et al, Schulman et al, and British Thoracic Society randomized at diagnosis; Kearon et al and Levine et al randomized to stop or to continue treatment of 2 more months after the initial 4 wk of treatment.

<sup>e</sup>Generally, study design was strong. No study stopped early for benefit; two stopped early because of slow recruitment (Kearon et al, Pinede et al). In one study (British Thoracic Society), 44 randomized patients were excluded centrally as they did not satisfy eligibility criteria. Patients and caregivers were blinded in two studies (Kearon et al, Levine et al). Adjudicators of outcomes were blinded in all but one study (British Thoracic Society). All studies appeared to have used effective randomization concealment, ITT analysis, and appears to have a low unexplained drop-out frequency.

<sup>f</sup>No heterogeneity with  $I^2 = 0\%$ .

<sup>g</sup>No imprecision for overall estimates. However, for the subgroup of patients with isolated distal DVT, who are known to have a very low risk of recurrence, there is imprecision and the possibility that the shorter duration of anticoagulation is adequate and not associated with a clinically important higher risk of recurrence.

<sup>d</sup>Follow-up was for ~1 y in all studied except for Schulman et al in which it was 2 y.

<sup>h</sup>Differences in mortality are expected to be mediated by differences in recurrent VTE and bleeding.

**Table S24—[Sections 3.1.1-3.1.4] Comparison of Durations of Anticoagulant Therapy for DVT and PE: Clinical Description and Results**

| Author/Year (Acronym)                              | Intervention                     | No. Patients Analyzed | Length Follow-up | Recurrent DVT or PE           | Major Bleeding                                              | Total Mortality             | Comments                                                                                                                                                                                 |
|----------------------------------------------------|----------------------------------|-----------------------|------------------|-------------------------------|-------------------------------------------------------------|-----------------------------|------------------------------------------------------------------------------------------------------------------------------------------------------------------------------------------|
| Kearon et al <sup>87</sup> /2004 (SOFAT)           | VKA stopped (placebo)            | 84/84                 | 11 mo            | 5/84 (6%)                     | 0/84                                                        | 0/84                        | Population: first DVT or PE. Treated for 1 mo. VTE was asymptomatic in 9% and isolated calf DVT in 18%. One VTE occurred while on warfarin.                                              |
|                                                    | VKA (INR 2.0-3.0) For 2 more mo. | 81/81                 | 11 mo            | 3/81 (4%) RR 0.6 (0.1-2.5)    | 0/81 RR 1.0 (0.0-51.6)                                      | 1/81 (1%) RR 3.1 (0.1-74.4) |                                                                                                                                                                                          |
| Pinede et al <sup>87</sup> /2001 (DOTAVK)          | VKA (INR 2.0-3.0) for 1.5 mo     | 105/105               | 15 mo            | 2/105 (2%)                    | 1/105 (1%)                                                  | Not specified               | Population: first isolated calf DVT.                                                                                                                                                     |
|                                                    | VKA (INR 2.0-3.0) for 3 mo       | 92/92                 |                  | 3/92 RR 1.7 (0.3-10.0)        | 3/92 RR 3.4 (0.4-33.4)                                      |                             |                                                                                                                                                                                          |
| Schulman et al <sup>88</sup> /1995 (DURAC 1)       | VKA (INR 2.0-2.85) for 1.5 mo    | 443/443               | 2 y              | 80/443 (18%)                  | 1/443                                                       | 22/443 (5%)                 | First VTE: DVT (distal or proximal) or PE. Only asked about bleeding while on VKAs.                                                                                                      |
|                                                    | VKA (INR 2.0-2.85) for 6 mo      | 454/454               |                  | 43/454 (9%) RR 0.5 (0.4, 0.7) | 5/454 (1%) RR 4.9 (0.6-41.6)                                | 17/454 (4%) RR (0.7-1.4)    |                                                                                                                                                                                          |
| Levine et al <sup>89</sup> /1995                   | VKA stopped (placebo)            | 105/107               | 9 mo             | 12/105 (11%)                  | 0/105                                                       | 9/105 (9%)                  | Proximal DVT (first episode in 91%). Cancer in 21%.                                                                                                                                      |
|                                                    | VKA (INR 2.0-3.0) for 2 more mo. | 109/113               |                  | 7/109 (6%) RR 0.6 (0.2-1.4)   | 1/109 (1%) RR 2.9 (0.1-70.2) (within 2 mo of randomization) | 9/109 (8%) RR 1.0 (0.4-2.5) |                                                                                                                                                                                          |
| British Thoracic Society et al <sup>90</sup> /1992 | VKA (INR 2.0-3.0) For 1 mo       | 358/358               | 1 y              | 28/358 (11%)                  | 5/358 (1%)                                                  | 26/358 (7%)                 | Population: DVT or PE; only 71% objectively diagnosed; proportion with a previous VTE not known. All bleeds were on VKA. Only 1 recurrent VTE among 116 patients with postoperative VTE. |
|                                                    | VKA (INR 2.0-3.0) for 3 mo       | 354/354               | 1 y              | 14/354 (4%) RR 0.5 (0.3-0.9)  | 4/354 (1%) RR 0.8 (0.2-3.0)                                 | 28/354 (8) RR 1.1 (0.6-1.8) |                                                                                                                                                                                          |

(Continued)

**Table S24—Continued**

| Author/Year (Acronym)                                                    | Intervention                    | No. Patients Analyzed | Length Follow-up | Recurrent DVT or PE           | Major Bleeding                                        | Total Mortality                                 | Comments                                                                                                                                                  |
|--------------------------------------------------------------------------|---------------------------------|-----------------------|------------------|-------------------------------|-------------------------------------------------------|-------------------------------------------------|-----------------------------------------------------------------------------------------------------------------------------------------------------------|
| Different intermediate durations (6 or 12 mo vs 3 mo) of anticoagulation |                                 |                       |                  |                               |                                                       |                                                 |                                                                                                                                                           |
| Campbell et al <sup>61</sup> /2007                                       | VKA (INR 2.0-3.5) for 3 mo      | 369/396               | 1 y              | 31/369 (8%)                   | 0/369 (during 3 mo. treatment)                        | 15/369 (4%)                                     | Population: DVT or PE; proportion with calf DVT not known. Only bleeding during treatment is reported; 20% of VTE outcomes were not objectively verified. |
|                                                                          | VKA (INR 2.0-3.5) for 6 mo      | 380/414               | 1 y              | 29/380 (8%) RR 0.9 (0.6-1.5)  | 8/380 (2%) (during 6 mo. treatment) RR 16.5 (1.0-285) | 19/369 (5%) RR 1.3 (0.6-2.5)                    |                                                                                                                                                           |
| Agnelli et al <sup>62</sup> /2003 (WODIT PE)                             | VKA stopped                     | 91/91                 | 2.6 y (mean)     | 11/91 (12%)                   | 1/91 (1%)                                             | 7/91 (8%)                                       | Population: first unprovoked PE. Treated for ≥ 3 mo. Among the 4 groups, only 1 recurrent VTE while on VKA.                                               |
|                                                                          | VKA (INR 2.0-3.0) for 9 more mo | 90/90                 | 2.9 y (mean)     | 11/90 (12%) RR 1.0 (0.5-2.2)  | 2/90 (2%) RR 2.0 (0.5-21.9)                           | 8/90 (9%) RR 1.16 (0.4-3.0)                     |                                                                                                                                                           |
|                                                                          | VKA stopped                     | 70/70                 | 2.8 y (mean)     | 7/70 (10%)                    | 0/70 (0%)                                             | 0/70 (0%)                                       | Population: first provoked PE. Treated for ≥ 3 mo (see above)                                                                                             |
|                                                                          | VKA (INR 2.0-3.0) for 3 more mo | 75/75                 | 2.9 y (mean)     | 4/75 (5%) RR 0.5 (0.2-1.7)    | 1/75 (1%) RR 1.9 (0.1-56)                             | 4/75 (5%) RR 8.4 (0.5-153)                      |                                                                                                                                                           |
| Agnelli et al <sup>63</sup> /2001 (WODIT DVT)                            | VKA stopped                     | 133/133               | 3.2 y (mean)     | 21/133 (16%)                  | 2/133 (2%)                                            | 7/133 (5%)                                      | Population: first unprovoked proximal DVT treated for 3 mo. One patient had recurrent VTE on VKA. Bleeding in the intervention group was while on VKA.    |
|                                                                          | VKA (INR 2.0-3.0) for 9 mo      | 134/134               | 3.1 y (mean)     | 21/134 (16%) RR 1.0 (0.6-1.7) | 4/134 (3%) RR 2.0 (0.4-10.7)                          | 7/134 (5%) RR 1.0 (0.4-2.8)                     |                                                                                                                                                           |
| Pinede et al <sup>64</sup> /2001 (DOTAVK)                                | VKA (INR 2.0-3.0) for 3 mo      | 270/270               | 15 mo            | 21/270 (8%)                   | 5/270 (2%)                                            | Not specified                                   | Population: first proximal DVT or PE. Recurrent VTE occurred after VKA in 26/28 of the short duration groups and 21/27 of the long duration groups.       |
|                                                                          | VKA (INR 1.0-3.0) for 6 mo      | 269/269               |                  | 23/269 (9%) RR 1.1 (0.6-1.9)  | 7/269 (3%) RR 1.4 (0.4-4.4)                           |                                                 |                                                                                                                                                           |
| Siragusa et al <sup>64</sup> /2008 (DACUS)                               | VKA stopped                     | 92/92                 | 1.8 y            | 27/92 (29%)                   | 1/92 (1%)                                             | Not specified (total of 3 non-VTE/bleed deaths) | Population: first proximal DVT (provoked, 24%; unprovoked, 76%) treated for 3 mo and residual DVT on baseline ultrasound                                  |

(Continued)



**Table S24—Continued**

| Author/Year (Acronym)                        | Intervention                                       | No. Patients Analyzed | Length Follow-up | Recurrent DVT or PE         | Major Bleeding                | Total Mortality              | Comments                                                                                                                                                                                                                                          |
|----------------------------------------------|----------------------------------------------------|-----------------------|------------------|-----------------------------|-------------------------------|------------------------------|---------------------------------------------------------------------------------------------------------------------------------------------------------------------------------------------------------------------------------------------------|
| Palareti et al <sup>85</sup> /2006 (PROLONG) | Remain off (stop) VKA                              | 103/105               | 1.4 y (mean)     | 18/120 (15%)                | 0/103                         | 1/103 (1%)                   | Population: first unprovoked proximal DVT or PE. Treated for $\geq 3$ mo. VKA stopped and D-dimer positive 1 mo later. Eight control patient. Restarted VKA, some after superficial phlebitis. One recurrent VTE in VKA group after VKA stopped.  |
|                                              | Restart indefinite VKA (INR 2.0-3.0) (not blinded) | 120/122               | (maximum, 1.5 y) | 2/103 (2%) RR 0.1 (0.0-0.4) | 1/120 (1%) RR 2.6 (0.1-62.6)  | 1/120 (1%) RR 0.9 (0.1-13.6) |                                                                                                                                                                                                                                                   |
| Kearon et al <sup>86</sup> /1999 (LAFIT)     | VKA stopped (placebo)                              | 83/83                 | 10 mo (mean)     | 17/83 (20%)                 | 0/83                          | 3/83 (4%)                    | Population: first unprovoked proximal DVT or PE (5% had previous provoked VTE). The recurrent VTE in the VKA patient was after stopping VKA.                                                                                                      |
|                                              | VKA (INR 2.0-3.0) for 2 more years                 | 79/79                 | (maximum, 2 y)   | 1/79 (1%) RR 0.1 (0.0-0.5)  | 3/79 (4%) RR 7.4 (0.4-140)    | 1/79 (1%) RR 0.3 (0.0-3.3)   |                                                                                                                                                                                                                                                   |
| Schulman et al <sup>87</sup> /1997 (DURAC 2) | VKA (INR 2.0-2.85) for 6 mo                        | 111/111               | 4 y              | 23/111 (2%)                 | 3/111 (3%)                    | 16/111 (14%)                 | Second VTE; DVT (distal or proximal) or PE. All recurrent VTE in the indefinite VKA group were after stopping VKAs. Bleeding during the first 6 mo of VKA in 1 of 6 mo group and 6 of indefinite group (only asked about bleeding while on VKAs). |
|                                              | VKA (INR 2.0-2.85) indefinitely                    | 116/116               |                  | 3/116 (3%) RR 0.1 (0.0-0.4) | 10/116 (9%) RR 3.2 (0.9-11.3) | 10/116 (9%) RR 0.6 (0.3-1.3) |                                                                                                                                                                                                                                                   |
| Farrar et al <sup>88</sup> /2004             | VKA (INR 2.0-3.0) for 6 mo                         | 32/36                 | 3 y              | 7/32 (22%)                  | 2/32 (6%)                     | 0/32                         | In total: 2 VTE after 24 mo (24 mo group); 1 VTE on therapy (24 mo group)                                                                                                                                                                         |
|                                              | VKA (INR 2.0-2.85) for 24 mo                       | 32/36                 |                  | 3/32 (3%) RR 0.4 (0.1-1.5)  | 2/32 (6%) RR 1.0 (0.2-6.7)    | 0/32                         |                                                                                                                                                                                                                                                   |

(Continued)

**Table S24—Continued**

| Author/Year (Acronym)                         | Intervention                                            | No. Patients Analyzed | Length Follow-up | Recurrent DVT or PE          | Major Bleeding               | Total Mortality             | Comments                                                                                                                                                                                                            |
|-----------------------------------------------|---------------------------------------------------------|-----------------------|------------------|------------------------------|------------------------------|-----------------------------|---------------------------------------------------------------------------------------------------------------------------------------------------------------------------------------------------------------------|
| Prandoni et al <sup>109</sup> /2009 (AESOPUS) | VKA stopped if provoked and 3 more months if unprovoked | 268/268               | 33 mo            | 46/268 (17%)                 | 2/268 (1%)                   | 11/268 (4%)                 | Population: first provoked (43%) or unprovoked (57%) proximal DVT treated for 3 mo. One VTE in each group while on VKAs. The flexible group was treated for a mean of 4 mo (provoked) and 5 mo (unprovoked) longer. |
|                                               |                                                         |                       |                  |                              |                              |                             |                                                                                                                                                                                                                     |
| Ridker et al <sup>110</sup> /2003 (PREVENT)   | VKA stopped or not restarted (placebo)                  | 253/253               | 2.1 y (mean)     | 37/253 (15%)                 | 2/253 (1%)                   | 8/253 (3%)                  | Population: unprovoked DVT (distal or proximal) or PE (first episode in 38%). Eight recurrent VTE in the VKA group after stopping VKAs.                                                                             |
|                                               |                                                         |                       |                  |                              |                              |                             |                                                                                                                                                                                                                     |
| Kearon et al <sup>101</sup> /2003 (ELATE)     | VKA INR 1.5-2.0                                         | 255/255               | (maximum, 4.3 y) | 14/255 (5%) RR 0.4 (0.2-0.7) | 5/255 (2%) RR 2.5 (0.5-12.7) | 4/255 (2%) RR 0.5 (0.1-1.6) | Population: unprovoked proximal DVT or PE (first episode in 31%). Treated for ≥ 3 mo. VKA (INR 2.0-3.0) (mean 12 mo). Five recurrent VTE in INR 1.5-1.9 and three in the INR 2.0-3.0 group after stopping VKAs.     |
|                                               |                                                         |                       |                  |                              |                              |                             |                                                                                                                                                                                                                     |
| Kearon et al <sup>101</sup> /2003 (ELATE)     | VKA INR 1.5-1.9                                         | 369/369               | 2.4 y (mean)     | 16/369 (4%)                  | 9/369 (2%)                   | 16/369 (4%)                 | Population: unprovoked proximal DVT or PE (first episode in 31%). Treated for ≥ 3 mo. VKA (INR 2.0-3.0) (mean 12 mo). Five recurrent VTE in INR 1.5-1.9 and three in the INR 2.0-3.0 group after stopping VKAs.     |
|                                               |                                                         |                       |                  |                              |                              |                             |                                                                                                                                                                                                                     |
| Kearon et al <sup>101</sup> /2003 (ELATE)     | VKA INR 2.0-3.0 (blinded)                               | 369/369               | 2.4 y (mean)     | 6/369 (2%) RR 0.4 (0.1-0.9)  | 8/369 (2%) RR 0.9 (0.3-2.3)  | 8/369 (2%) RR 0.5 (0.2-1.2) | Population: unprovoked proximal DVT or PE (first episode in 31%). Treated for ≥ 3 mo. VKA (INR 2.0-3.0) (mean 12 mo). Five recurrent VTE in INR 1.5-1.9 and three in the INR 2.0-3.0 group after stopping VKAs.     |
|                                               |                                                         |                       |                  |                              |                              |                             |                                                                                                                                                                                                                     |

AESOPUS = Ultrasound Findings to Adjust the Duration of Anticoagulation; DACUS = Duration of Anticoagulation based on Compression UltraSonography; DOTAVK = Durée Optimale du Traitement Antithrombotique; DURAC = Duration of Anticoagulation; ELATE = Anticoagulation for Thrombo-Embolism; LAFTT = Long-term Anticoagulation for a First episode of Idiopathic venous Thromboembolism; PREVENT = Prevention of Recurrent Venous Thromboembolism; SOFAST = First Acute Secondary Thrombosis; WODIT DVT = Warfarin Optimal Duration Italian Trial in patients with DVT; WODIT PE = Warfarin Optimal Duration Italian Trial in patients with Pulmonary Embolism. See Table S1, S2, and S7 legends for expansion of other abbreviations.

**Table S25—[Sections 3.1.1-3.1.4] Comparison of Durations of Anticoagulant Therapy for DVT and PE: Methodologic Quality**

| Author/Year (Acronym)                              | Intervention                                                           | Study Design | Randomization Concealed | Blinding                                                                                   | Loss to Follow-up                                                                | Analysis | Comments                                                                                                                                                                                             |
|----------------------------------------------------|------------------------------------------------------------------------|--------------|-------------------------|--------------------------------------------------------------------------------------------|----------------------------------------------------------------------------------|----------|------------------------------------------------------------------------------------------------------------------------------------------------------------------------------------------------------|
| Kearon et al <sup>86</sup> /2004 (SOFAST)          | VKA stopped (placebo)<br>VKA (INR 2.0-3.0) for 2 more mo               | RCT          | CY                      | Patients: CY<br>Caregivers: CY<br>Adjudications: CY<br>Data Analysts: CY                   | Placebo: 0/84<br>VKA: 0/81                                                       | ITT      | Stopped early because of slow recruitment.                                                                                                                                                           |
| Pinede et al <sup>87</sup> /2001 (DOT AVK)         | VKA (INR 2.0-3.0) for 1.5 and 3 mo<br>VKA (INR 1.0-3.0) for 3 and 6 mo | RCT          | CY                      | Patients: CN<br>Caregivers: CN<br>Adjudications: CY<br>Data Analysts: PN                   | Not specified<br>Probably low or nil                                             | ITT      | Stopped early because of slow recruitment. Patient withdrawals: 4 in short- and 16 in long-duration groups. Total of 22 patients dropped out.                                                        |
| Schulman et al <sup>88</sup> /1995 (DURAC 1)       | VKA (INR 2.0-2.85) for 1.5 mo<br>VKA (INR 2.0-2.85) for 6 mo           | RCT          | CY                      | Patients: CN<br>Caregivers: CN<br>Adjudications: VTE, CY<br>Other: PN<br>Data Analysts: PN | Total of 44 patients dropped out during follow-up but partial follow-up achieved | ITT      | Five patients were excluded because protein C found after randomization.                                                                                                                             |
| Levine et al <sup>89</sup> /1995                   | VKA stopped (placebo)<br>VKA (INR 2.0-3.0) for 2 more mo.              | RCT          | CY                      | Patients: CY<br>Caregivers: CY<br>Adjudications: VTE, CY<br>Data Analysts: PN              | Placebo: 1/105<br>VKA: 6/109<br>(did not complete 11-mo follow-up)               | ITT      | Two placebo and 4 warfarin patients withdrew consent shortly after randomization.                                                                                                                    |
| British Thoracic Society et al <sup>90</sup> /1992 | VKA (INR 2.0-3.0) For 1 mo<br>VKA (INR 2.0-3.0) for 3 mo               | RCT          | CY                      | Patients: CN<br>Caregivers: CN<br>Adjudications: CN<br>Data Analysts: PN                   | No VKA: 27/354<br>VKA: 30/358                                                    | ITT      | Forty-four randomized patients excluded centrally as did not satisfy entry criteria.                                                                                                                 |
| Campbell et al <sup>91</sup> /2007                 | VKA (INR 2.0-3.5) for 3 mo<br>VKA (INR 2.0-3.5) for 6 mo               | RCT          | CY                      | Patients: CN<br>Caregivers: CN<br>Adjudications: CN<br>Data Analysts: PN                   | 3- mo VKA: 6/369<br>6- mo VKA: 4/380                                             | ITT      | Sixty-one randomized patients excluded centrally as did not satisfy entry criteria. Stopped early because of low recruitment.                                                                        |
| Agnelli et al <sup>92</sup> /2003 (WODIT PE)       | VKA stopped<br>VKA (INR 2.0-3.0) for 9 more mo.                        | RCT          | CY                      | Patients: CN<br>Caregivers: CN<br>Adjudications: CY<br>Data Analysts: PN                   | Not specified<br>Probably low or nil                                             | ITT      | Two patients in the control groups and 2 patients in the intervention groups crossed over. Five patients in the intended group did not stop VKA. Four patients in the control groups restarted VKAs. |
| Agnelli et al <sup>93</sup> /2001 (WODIT DVT)      | VKA stopped<br>VKA (INR 2.0-3.0) for 9 mo                              | RCT          | CY                      | Patients: CN<br>Caregivers: CN<br>Adjudications: CY<br>Data Analysts: PN                   | Not specified<br>Probably low or nil                                             | ITT      | Trial stopped early for lack of adequate benefit. Four patients in the intervention and 2 patients in the control group crossed over.                                                                |

(Continued)

**Table S25—Continued**

| Author/Year (Acronym)                        | Intervention                                                                                                                                                          | Study Design | Randomization Concealed | Blinding                                                                                        | Loss to Follow-up                                                                 | Analysis | Comments                                                                                                                                                                                           |
|----------------------------------------------|-----------------------------------------------------------------------------------------------------------------------------------------------------------------------|--------------|-------------------------|-------------------------------------------------------------------------------------------------|-----------------------------------------------------------------------------------|----------|----------------------------------------------------------------------------------------------------------------------------------------------------------------------------------------------------|
| Siragusa et al <sup>19</sup> /2008 (DACUS)   | VKA stopped<br>VKA (INR 1.0-3.0) for 9 mo.                                                                                                                            | RCT          | PY                      | Patients: CN<br>Caregivers: CN<br>Adjudicators: PY<br>Data Analysts: PN                         | None                                                                              | ITT      | Not known whether the many postenrollment exclusions were postrandomization. Trial stopped early because recurrent VTE was higher than expected.                                                   |
| Palareti et al <sup>18</sup> /2006 (PROLONG) | Remain off (stop) VKA<br>Restart indefinitely VKA (INR 2.0-3.0) (not blinded)                                                                                         | RCT          | CY                      | Patients: CN<br>Caregivers: CN<br>Adjudicators: CY<br>Data Analysts: PN                         | No VKA: <3/105<br>VKA: 0/122                                                      | ITT      | Four patients excluded because lupus anticoagulant found after randomization.                                                                                                                      |
| Kearon et al <sup>16</sup> /1999 (LAFIT)     | VKA stopped (placebo)<br>VKA (INR 2.0-3.0) for 2 more y                                                                                                               | RCT          | CY                      | Patients: CY<br>Caregivers: CY<br>Adjudicators: CY<br>Data Analysts: CY                         | None                                                                              | ITT      | Trial stopped early because of overall benefit. After recurrent VTE, patients were not followed, resulting in shorter follow-up and potential for underestimation of bleeding in the no-VKA group. |
| Schulman et al <sup>17</sup> /1997 (DURAC 2) | VKA (INR 2.0-2.85) for 6 mo<br>VKA (INR 2.0-2.85) indefinitely                                                                                                        | RCT          | CY                      | Patients: CN<br>Caregivers: CN<br>Adjudicators: VTE, CY<br>Other, PN<br>Data Analysts: PN       | Total of 14 patients dropped out during follow-up, but partial follow-up achieved | ITT      | Actual mean duration of VKA was 7.7 mo in 6-mo group and 42.7 mo in indefinite (48 mo) group.                                                                                                      |
| Prandoni et al <sup>19</sup> /2009 (AESOPUS) | VKA stopped if provoked and 3 more mo if unprovoked<br>Stopped if no residual vein thrombosis and until resolved or 9 more mo if provoked or 21 more mo if unprovoked | RCT          | CY                      | Patients: CN<br>Caregivers: CN<br>Adjudicators: VTE, CY<br>Data Analysts: PY                    | 4 subjects in each group                                                          | ITT      |                                                                                                                                                                                                    |
| Ridker et al <sup>10</sup> /2003 (PREVENT)   | VKA stopped or not restarted (placebo)<br>VKA INR 1.5-2.0                                                                                                             | RCT          | CY                      | Patients: CY<br>Caregivers: CY<br>Adjudicators: CY<br>Data Analysts: CY                         | Not specified<br>Probably low or nil                                              | ITT      | Trial stopped early because of overall benefit. Number of crossovers not described.                                                                                                                |
| Farrar et al <sup>15</sup> /2004             | VKA (INR 2.0-3.0) for 6 mo<br>VKA (INR 2.0-2.85) for 24 mo                                                                                                            | RCT          | PY                      | Patients: CN<br>Caregivers: CN<br>Data Collectors: PN.<br>Adjudicators: PN<br>Data Analysts: PN | 0/32<br>0/32 (see comments)                                                       | ITT      | Four postrandomization exclusions for each group because of poor compliance.                                                                                                                       |
| Kearon et al <sup>10</sup> /2003 (ELATE)     | VKA INR 1.5-1.9<br>VKA INR 2.0-3.0 (blinded)                                                                                                                          | RCT          | CY                      | Patients: CY<br>Caregivers: CY<br>Adjudicators: CY<br>Data Analysts: CY                         | INR 1.5-1.9: ≤ 1/369 INR 1.5-1.9: ≤ 1/369                                         | ITT      | Crossover to INR 2.0-3.0 in 21 patients                                                                                                                                                            |

See Table S1, S2, S7, and S24 legends for expansion of abbreviations.

**Table S26—[Sections 3.1.1-3.1.4] Evidence Profile: Six or Twelve Months vs Three Months as Minimum Duration of Anticoagulation for VTE<sup>a,b</sup>**

| Participants (Studies), Follow-up | Quality Assessment                   |                          |                         |                        |                  |                                            | Summary of Findings   |                  |                              |                          |                                               |
|-----------------------------------|--------------------------------------|--------------------------|-------------------------|------------------------|------------------|--------------------------------------------|-----------------------|------------------|------------------------------|--------------------------|-----------------------------------------------|
|                                   | Risk of Bias                         | Inconsistency            | Indirectness            | Imprecision            | Publication Bias | Overall Quality of Evidence                | Study Event Rates (%) |                  | Anticipated Absolute Effects |                          |                                               |
|                                   |                                      |                          |                         |                        |                  |                                            | With 3 mo             | With 6 or 12 mo  | Risk With 3 mo               | Relative Effect (95% CI) | Risk Difference With 6 or 12 mo (95% CI)      |
| 2,061 (6 studies), 1-3 y          | No serious risk of bias <sup>c</sup> | No serious inconsistency | No serious indirectness | Serious <sup>d,e</sup> | Undetected       | Moderate <sup>d,e</sup> due to imprecision | 118/1,025 (11.5)      | 105/1,036 (10.1) | 115 per 1,000                | RR 0.89 (0.69-1.14)      | 13 fewer per 1,000 (from 36 fewer to 16 more) |
| 2,061 (6 studies), 1-3 y          | No serious risk of bias <sup>f</sup> | No serious inconsistency | No serious indirectness | No serious imprecision | Undetected       | High <sup>f</sup>                          | 9/1,025 (0.9)         | 24/1,036 (2.3)   | 9 per 1,000                  | RR 2.49 (1.2-5.16)       | 13 more per 1,000 (from 2 more to 37 more)    |
| 1,331 (5 studies), 1-3 y          | No serious risk of bias              | No serious inconsistency | No serious indirectness | Serious <sup>g</sup>   | Undetected       | Moderate <sup>g</sup> due to imprecision   | 29/663 (4.4)          | 38/668 (5.7)     | 44 per 1,000                 | RR 1.3 (0.81-2.08)       | 13 more per 1,000 (from 8 fewer to 47 more)   |

Bibliography: Pinede et al,<sup>87</sup> Campbell et al,<sup>91</sup> Agnelli et al,<sup>93</sup> Agnelli et al,<sup>92</sup> Siragusa.<sup>94</sup> See Table S1, S2, and S5 legends for expansion of abbreviations.

<sup>a</sup>Timing of randomization relative to the start of treatment and length of treatment in the non-3-mo group varied across studies: Pinede et al and Campbell et al randomized at diagnosis, and Agnelli et al randomized after the initial 3 mo of treatment to stop, or continue, treatment. The longer duration of treatment was 6 mo in Pinede, Campbell, and Agnelli et al (2003) (provoked PE), and 12 mo in Agnelli (2001) and Agnelli (2003) (unprovoked PE).

<sup>b</sup>Study populations varied across studies: Pinede et al enrolled provoked and unprovoked proximal DVT and PE; Campbell et al enrolled provoked and unprovoked isolated distal DVT, proximal DVT and PE; Agnelli et al (2003) had separate randomizations for provoked PE (3 vs 6 mo) and unprovoked (3 vs 12 mo); and Agnelli et al (2001) enrolled unprovoked proximal DVT.

<sup>c</sup>Generally, study design was strong. No study stopped early for benefit; two stopped early because of slow recruitment (Campbell et al, Pinede et al), and one stopped because of lack of benefit (Agnelli et al [2001]). In one study (Campbell), 20% of VTE outcomes were not objectively confirmed. Patients and caregivers were not blinded in any study. Adjudicators of outcomes were blinded in all but one study (Campbell). All studies used effective randomization concealment and ITT analysis and appear to have a low unexplained drop-out frequency.

<sup>d</sup>CI: include both values suggesting no effect and values suggesting either benefit or harm.

<sup>e</sup>Low number of events and a total number of participants < 2,000.

<sup>f</sup>One study may have confounded the assessment of bleeding to when subjects were receiving anticoagulant therapy, which could have inflated the increase in bleeding associated with the longer duration of therapy (Campbell et al).

<sup>g</sup>Differences in mortality are expected to be mediated by differences in recurrent VTE and bleeding.

**Table S27—[Sections 3.1.1-3.1.4] Extended Anticoagulation vs No Extended Anticoagulation for Different Groups of Patients With VTE and Without Cancer<sup>a,b</sup>**

| Participants (Studies), Follow-up | Quality Assessment                       |                                       |                         |                        |                  |                                            |                               |                             |                                       |                                               | Summary of Findings                                                       |                                            |                                                  |  |
|-----------------------------------|------------------------------------------|---------------------------------------|-------------------------|------------------------|------------------|--------------------------------------------|-------------------------------|-----------------------------|---------------------------------------|-----------------------------------------------|---------------------------------------------------------------------------|--------------------------------------------|--------------------------------------------------|--|
|                                   | Risk of Bias                             | Inconsistency                         | Indirectness            | Imprecision            | Publication Bias | Overall Quality of Evidence                | Study Event Rates (%)         |                             | Anticipated Absolute Effects          |                                               |                                                                           |                                            |                                                  |  |
|                                   |                                          |                                       |                         |                        |                  |                                            | With Extended Anticoagulation | No Extended Anticoagulation | Risk With No Extended Anticoagulation | Risk Difference With Extended Anticoagulation |                                                                           |                                            |                                                  |  |
| 1,184 (4 studies), 10-36 mo       | No serious risk of bias                  | No serious inconsistency <sup>c</sup> | No serious indirectness | Serious <sup>d,e</sup> | Undetected       | Moderate <sup>e-e</sup> due to imprecision | 38/599 (6.3)                  | 16/585 (2.7)                | RR 0.57 (0.31-1.03)                   | 63 per 1,000                                  | 27 fewer per 1,000 (from 44 fewer to 2 more)                              |                                            |                                                  |  |
|                                   | Mortality (important outcome)            |                                       |                         |                        |                  |                                            |                               |                             |                                       |                                               | First VTE provoked by surgery <sup>f,j</sup>                              | 10 per 1,000                               | 10 per 1,000                                     |  |
| 1,184 (4 studies), 10-36 mo       | No serious risk of bias                  | No serious inconsistency              | No serious indirectness | No serious imprecision | Undetected       | High                                       | 102/599 (17)                  | 21/585 (3.6)                | RR 0.12 (0.09-0.38)                   | First VTE provoked by surgery <sup>f,j</sup>  | 10 per 1,000                                                              | 10 per 1,000                               |                                                  |  |
|                                   | Recurrent VTE at 1 y (critical outcome)  |                                       |                         |                        |                  |                                            |                               |                             |                                       |                                               | First VTE provoked nonsurgical/first unprovoked distal DVT <sup>g,j</sup> | 50 per 1,000                               | 44 fewer per 1,000 (from 31 fewer to 45 fewer)   |  |
|                                   |                                          |                                       |                         |                        |                  |                                            |                               |                             |                                       |                                               | First unprovoked VTE <sup>h,j</sup>                                       | 100 per 1,000                              | 88 fewer per 1,000 (from 62 fewer to 91 fewer)   |  |
|                                   |                                          |                                       |                         |                        |                  |                                            |                               |                             |                                       |                                               | Second unprovoked VTE <sup>h,j</sup>                                      | 150 per 1,000                              | 132 fewer per 1,000 (from 93 fewer to 137 fewer) |  |
| 1,184 (4 studies), 10-36 mo       | No serious risk of bias                  | No serious inconsistency              | No serious indirectness | Serious                | Undetected       | Moderate due to imprecision                | 7/599 (1.2%)                  | 21/585 (3.6%)               | RR 2.63 (1.02-6.76)                   | Low risk of bleeding <sup>k,l</sup>           | 3 per 1,000                                                               | 5 more per 1,000 (from 0 more to 17 more)  |                                                  |  |
|                                   | Major bleeding at 1 y (critical outcome) |                                       |                         |                        |                  |                                            |                               |                             |                                       |                                               | Moderate risk of bleeding <sup>k,l</sup>                                  | 6 per 1,000                                | 10 more per 1,000 (from 0 more to 35 more)       |  |
|                                   |                                          |                                       |                         |                        |                  |                                            |                               |                             |                                       | High risk of bleeding <sup>k,l</sup>          | 12 per 1,000                                                              | 20 more per 1,000 (from 0 more to 69 more) |                                                  |  |

(Continued)

**Table S27—Continued**

| Participants (Studies),<br>Follow-up | Quality Assessment      |                          |                         |                        | Summary of Findings |                             |                                          |                             |                              |                                                                                                                                                |
|--------------------------------------|-------------------------|--------------------------|-------------------------|------------------------|---------------------|-----------------------------|------------------------------------------|-----------------------------|------------------------------|------------------------------------------------------------------------------------------------------------------------------------------------|
|                                      | Risk of Bias            | Inconsistency            | Indirectness            | Imprecision            | Publication Bias    | Overall Quality of Evidence | Study Event Rates (%)                    |                             | Anticipated Absolute Effects |                                                                                                                                                |
|                                      |                         |                          |                         |                        |                     |                             | With Extended Anticoagulation            | No Extended Anticoagulation | Relative Effect (95% CI)     | Risk With No Extended Anticoagulation                                                                                                          |
| 1,184 (4 studies),<br>10-36 mo       | No serious risk of bias | No serious inconsistency | No serious indirectness | No serious imprecision | Undetected          | High                        | 102/599 (17%)                            | 21/585 (3.6%)               | RR 0.12<br>(0.09-0.38)       | First VTE provoked by surgery <sup>f,j</sup><br>30 per 1,000<br>26 fewer per 1,000 (from 19 fewer to 27 fewer)                                 |
|                                      |                         |                          |                         |                        |                     |                             | Recurrent VTE at 5 y (critical outcome)  |                             |                              | First VTE provoked nonsurgical/first unprovoked distal DVT <sup>f,j</sup><br>150 per 1,000<br>132 fewer per 1,000 (from 93 fewer to 137 fewer) |
|                                      |                         |                          |                         |                        |                     |                             | First unprovoked VTE <sup>f,j</sup>      |                             |                              | 300 per 1,000<br>264 fewer per 1,000 (from 186 fewer to 273 fewer)                                                                             |
|                                      |                         |                          |                         |                        |                     |                             | Second unprovoked VTE <sup>f,j</sup>     |                             |                              | 450 per 1,000<br>396 fewer per 1,000 (from 279 fewer to 409 fewer)                                                                             |
| 1,184 (4 studies),<br>10-36 mo       | No serious risk of bias | No serious inconsistency | No serious indirectness | Serious imprecision    | Undetected          | Moderate due to imprecision | 7/599 (1.2%)                             | 21/585 (3.6%)               | RR 2.63<br>(1.02-6.77)       | Low risk of bleeding <sup>k,l</sup><br>15 per 1,000<br>24 more per 1,000 (from 0 more to 87 more)                                              |
|                                      |                         |                          |                         |                        |                     |                             | Moderate risk of bleeding <sup>k,l</sup> |                             |                              | 30 per 1,000<br>49 more per 1,000 (from 1 more to 173 more)                                                                                    |
|                                      |                         |                          |                         |                        |                     |                             | High risk of bleeding <sup>k,l</sup>     |                             |                              | 60 per 1,000<br>98 more per 1,000 (from 1 more to 346 more)                                                                                    |

Burden of anticoagulation not reported

(Continued)

**Table S27—Continued**

| Participants (Studies), Follow-up | Quality Assessment |               |              |             |                  |                             | Summary of Findings           |                             |                                       |                                               |                          |                 |                                       |                                                        |     |                          |
|-----------------------------------|--------------------|---------------|--------------|-------------|------------------|-----------------------------|-------------------------------|-----------------------------|---------------------------------------|-----------------------------------------------|--------------------------|-----------------|---------------------------------------|--------------------------------------------------------|-----|--------------------------|
|                                   | Risk of Bias       | Inconsistency | Indirectness | Imprecision | Publication Bias | Overall Quality of Evidence | Study Event Rates (%)         |                             |                                       | Anticipated Absolute Effects                  |                          |                 |                                       |                                                        |     |                          |
|                                   |                    |               |              |             |                  |                             | With Extended Anticoagulation | No Extended Anticoagulation | Risk With No Extended Anticoagulation | Risk Difference With Extended Anticoagulation | Relative Effect (95% CI) | Anticoagulation | Risk With No Extended Anticoagulation | Risk Difference With Extended Anticoagulation (95% CI) |     |                          |
| ...                               | ...                | ...           | ...          | ...         | ...              | ...                         | ...                           | ...                         | ...                                   | ...                                           | ...                      | ...             | ...                                   | ...                                                    | ... | See comment <sup>m</sup> |
| ...                               | ...                | ...           | ...          | ...         | ...              | ...                         | PTS not reported              | ...                         | ...                                   | ...                                           | ...                      | ...             | ...                                   | ...                                                    | ... | See comment <sup>n</sup> |

Bibliography: Schulman et al (DURAC 2),<sup>97</sup> Kearon et al (LAFIT),<sup>98</sup> Farraj,<sup>99</sup> Palareti (PROLONG);<sup>95</sup> See Table S1, S2, S7, and S10 legends for expansion of abbreviations.

<sup>a</sup>Studies vary in follow-up duration (10 mo to 3 y) and in duration of time-limited VKA (3 to 6 mo).

<sup>b</sup>We excluded Ridker et al (PREVENT)<sup>100</sup> because target INR was 1.75 (low intensity), which has been shown in an RCT to be less effective than a target of 2.5.

<sup>c</sup> $I^2 = 0\%$ .

<sup>d</sup>CI includes both values suggesting no effect and values suggesting either appreciable harms or appreciable benefit.

<sup>e</sup>Small number of events. Decision to rate down also takes into account that two studies were stopped early for benefit.

<sup>f</sup>Annual risk of VTE recurrence after discontinuing oral anticoagulation therapy in patients with first VTE provoked by surgery: 1% (Iorio A, Kearon C, Filippucci E, et al. Risk of recurrence after a first episode of symptomatic venous thromboembolism provoked by a transient risk factor: a systematic review. *Arch Intern Med.* 2010;170(19):1710-1716); we assumed a 0.5% yearly risk thereafter (3% over 5 y).

<sup>g</sup>Annual risk in patients with first VTE provoked by non surgical factor: about 5% the first year (Iorio et al); we assumed 2.5% yearly thereafter (15% over 5 y).

<sup>h</sup>Annual risk in patients with first episode of unprovoked VTE: 9.3% over 1 y in Rodger MA, Kahn SR, Wells PS, et al. Identifying unprovoked thromboembolism patients at low risk for recurrence who can discontinue anticoagulant therapy. *CMAJ.* 2008;179(5):417-426; 11.0% over 1 y, 19.6% over 3 y, and 29.1% over 5 y in Prandoni et al (2007). We assumed a risk of 10% the first year after discontinuation and 5% yearly thereafter (30% over 5 y).

<sup>i</sup>Annual risk in patients with second episode of unprovoked VTE: we assumed an RR of 1.5 compared with a first episode of unprovoked VTE: 15% the first year after discontinuation, 7.5% yearly thereafter (45% over 5 y).

<sup>j</sup>Case fatality rate of recurrent VTE after discontinuing oral anticoagulation therapy: 3.6% (Carrier 2010).

<sup>k</sup>Annual risk of major bleeding is based on three risk levels: low, intermediate, and high. The corresponding 0.3%, 0.6%, and 1.2% risks are estimates based on control arms of included studies (see Table 3).

<sup>l</sup>Case fatality rate of major bleeding during initial oral anticoagulation therapy: 11.3% (Carrier et al) (no data available for after discontinuing oral anticoagulation therapy).

<sup>m</sup>Burden of anticoagulation: endured by all patients who continue extended-duration anticoagulation (100%) and applies to patients who stop anticoagulation (no extended-duration anticoagulation) who subsequently experience a recurrent VTE (5%, 10%, 15% at 1 y; 15%, 30%, 45% at 5 y).

<sup>n</sup>Baseline risk over 2 y of 58.8% for PTS and 13.8% for severe PTS (VETO [Venous Thrombosis Outcomes study]; *Ann Intern Med.* 2008) and threefold (Prandoni. *Ann Intern Med.* 2004) to 10-fold (Van Dongen. *J Thromb Haemost.* 2005) increase in PTS.



**Table S28—[Section 3.3] Evidence Profile: LMWH vs VKA for Long-term Treatment of VTE<sup>a,c</sup>**

| Participants (Studies), Follow-up | Quality Assessment   |               |              |                      | Summary of Findings |                                                                                 |                       |                          |                                                                                       |
|-----------------------------------|----------------------|---------------|--------------|----------------------|---------------------|---------------------------------------------------------------------------------|-----------------------|--------------------------|---------------------------------------------------------------------------------------|
|                                   | Risk of Bias         | Inconsistency | Indirectness | Imprecision          | Publication Bias    | Overall Quality of Evidence                                                     | Study Event Rates (%) | Relative Effect (95% CI) | Anticipated Absolute Effects                                                          |
| 2,496 (7 studies), 6 mo           | No serious           | No serious    | No serious   | Serious <sup>e</sup> | Undetected          | Mortality (important outcome)<br>Moderate <sup>b,c</sup> due to imprecision     | 202/1,231 (16.4)      | RR 0.96 (0.81-1.13)      | 164 per 1,000 7 fewer per 1,000 (from 31 fewer to 21 more)                            |
|                                   | Serious <sup>f</sup> | No serious    | No serious   | No serious           | Undetected          | Recurrent VTE (critical outcome)<br>Moderate <sup>b,c</sup> due to risk of bias | 105/1,349 (7.8)       | RR 0.62 (0.46-0.84)      | No cancers <sup>g</sup><br>30 per 1,000 11 fewer per 1,000 (from 5 fewer to 16 fewer) |
| 2,727 (8 studies), 6 mo           | No serious           | No serious    | No serious   | Serious <sup>e</sup> | Undetected          | Mortality (important outcome)<br>Moderate <sup>b,c</sup> due to imprecision     | 53/1,351 (3.9%)       | RR 0.81 (0.55-1.2)       | No cancer or nonmetastatic cancer                                                     |
|                                   | Serious <sup>f</sup> | No serious    | No serious   | No serious           | Undetected          | Recurrent VTE (critical outcome)<br>Moderate <sup>b,c</sup> due to risk of bias | 105/1,349 (7.8)       | RR 0.62 (0.46-0.84)      | 20 per 1,000 4 fewer per 1,000 (from 9 fewer to 4 more)                               |
| 2,737 (8 studies), 6 mo           | No serious           | No serious    | No serious   | Serious <sup>e</sup> | Undetected          | Major bleeding (critical outcome)<br>Moderate <sup>b,c</sup> due to imprecision | 45/1,386 (3.2%)       | RR 0.81 (0.55-1.2)       | No cancer or nonmetastatic cancer                                                     |
|                                   | Serious <sup>f</sup> | No serious    | No serious   | No serious           | Undetected          | Major bleeding (critical outcome)<br>Moderate <sup>b,c</sup> due to imprecision | 45/1,386 (3.2%)       | RR 0.81 (0.55-1.2)       | 20 per 1,000 4 fewer per 1,000 (from 9 fewer to 4 more)                               |
|                                   |                      |               |              |                      |                     |                                                                                 |                       |                          | Metastatic cancer <sup>g</sup>                                                        |
|                                   |                      |               |              |                      |                     |                                                                                 |                       |                          | 80 per 1,000 15 fewer per 1,000 (from 36 fewer to 16 more)                            |

(Continued)

**Table S28—Continued**

| Participants (Studies), Follow-up | Quality Assessment     |                          |                        |                        | Summary of Findings |                                                       |                                                                                                                                                                                                                                    |                          |                                                              |
|-----------------------------------|------------------------|--------------------------|------------------------|------------------------|---------------------|-------------------------------------------------------|------------------------------------------------------------------------------------------------------------------------------------------------------------------------------------------------------------------------------------|--------------------------|--------------------------------------------------------------|
|                                   | Risk of Bias           | Inconsistency            | Indirectness           | Imprecision            | Publication Bias    | Overall Quality of Evidence                           | Study Event Rates (%)                                                                                                                                                                                                              | Relative Effect (95% CI) | Anticipated Absolute Effects                                 |
| ...                               | No serious limitations | No serious limitations   | No serious limitations | No serious limitations | Not applicable      | High                                                  | With VKA: Warfarin: daily medication, dietary interactions, frequent blood testing/monitoring, increased hospital/clinic visits<br>With LMWH: LMWH: daily injection, no dietary interactions, no frequent blood testing/monitoring | ...                      | ...                                                          |
| 100 (1 study), 2 y                | Serious <sup>d</sup>   | No serious inconsistency | Serious <sup>m</sup>   | No serious imprecision | Undetected          | Low <sup>v,lm</sup> due to risk of bias, indirectness | 31/44 (70.5%)                                                                                                                                                                                                                      | RR 0.85 (0.77-0.94)      | 200 per 1,000 30 fewer per 1,000 (from 12 fewer to 46 fewer) |

**Bibliography:** Included studies: Deitcher et al,<sup>102</sup> Hull et al,<sup>103</sup> Hull et al,<sup>104</sup> Lee et al,<sup>105</sup> Lopaciuk et al,<sup>106</sup> Lopez-Beret et al,<sup>107</sup> Meyer G et al,<sup>108</sup> Romera et al,<sup>109</sup> Two of these studies enrolled only patients without cancer,<sup>104,107</sup> 3 enrolled only patients with cancer<sup>105,102,105</sup>, and 3 enrolled both patients with and without cancer<sup>103,106,109</sup> (separate data provided for cancer and non-cancer patients in one study<sup>103,110</sup>). Excluded studies (less than 50% of therapeutic dose LMWH during extended phase): Pini et al,<sup>111</sup> Das et al,<sup>112</sup> Gonzalez-Fajardo et al,<sup>113</sup> Veiga et al,<sup>114</sup> Kakkak et al,<sup>115</sup> (Cesarone 2003 Circ abstract), PTS data from: Hull et al.<sup>104</sup> See Table S1, S2, S5, and S10 legends for expansion of abbreviations.

<sup>a</sup>Limited to LMWH regimens that used ≥ 50% of the acute treatment dose during the extended phase of treatment.  
<sup>b</sup>The initial parenteral anticoagulation was similar in both arms for all except one study (Hull et al [2007]) in which patients randomized to LMWH received initially the same LMWH, whereas patients randomized to VKA received initially UFH.

<sup>c</sup>Two of these studies enrolled only patients without cancer, three enrolled only patients with cancer, and three enrolled both patients with and without cancer (separate data provided for cancer and non-cancer patients in one study).

<sup>d</sup>One study did not report deaths, which is unusual and could reflect selective reporting of outcomes.  
<sup>e</sup>CI includes both no effect and harm with LMWH.

<sup>f</sup>None of the studies were blinded, although the diagnosis of recurrent VTE has a subjective component and there could be a lower threshold for diagnosis of recurrent VTE in VKA-treated patients because switching the treatment of such patients to LMWH is widely practiced. At the same time, there is reluctance to diagnose recurrent VTE in patients who are already on LMWH because there is no attractive alternative treatment option.

<sup>g</sup>Risk of recurrent VTE: low corresponds to patients without cancer (3% estimate taken from recent large RCTs of acute treatment), intermediate corresponds to patients with local or recently resected cancer (based on average rate across the six studies in this analysis and appears to be consistent with Prandoni et al [particularly if low risk is increased to 4%]), and high to patients with locally advanced or distant metastatic cancer (Prandoni et al<sup>116</sup>).

<sup>h</sup>No study was blinded; diagnosis of major bleeding has a subjective component.  
<sup>i</sup>The 95% CIs for the RR for major bleeding includes a potentially clinically important increase or decrease with LMWH and may vary with the dose of LMWH used during the extended phase of therapy.

<sup>j</sup>Risk of bleeding: low corresponds to patients without risk factor for bleeding (ie, > 75 y, cancer, metastatic disease; chronic renal or hepatic failure; platelet count < 80,000; requires antiplatelet therapy; history of bleeding without a reversible cause) (Table 2) (based on Prandoni et al<sup>116</sup> and Beyth et al,<sup>117</sup> adjusted to a 6-mo time frame).

<sup>k</sup>Hull et al reported no significant difference in quality of life but suggested greater satisfaction with LMWH over VKA (questionnaire did not directly assess the burden of injections).  
<sup>l</sup>Patients and investigators not blinded. Self-reported leg symptoms and signs after 3 mo of treatment.

<sup>m</sup>The association between leg symptoms and signs at 3 mo and long-term PTS is uncertain.  
<sup>n</sup>Baseline risk assumes that patients all wear pressure stockings. Control event rate comes from observational studies in review by Kahn et al,<sup>118</sup> adjusted to 2-y time frame.

**Table S29—[Section 3.3] Evidence Profile: Rivaroxaban vs LMWH and VKA Therapy for Short- and Long-term Treatment of VTE<sup>a,c</sup>**

| Participants (Studies)                | Quality Assessment                   |                          |                         |                      |                  | Summary of Findings                        |                                                                                                                       |                                                                                              |                                  |                                |                                             |
|---------------------------------------|--------------------------------------|--------------------------|-------------------------|----------------------|------------------|--------------------------------------------|-----------------------------------------------------------------------------------------------------------------------|----------------------------------------------------------------------------------------------|----------------------------------|--------------------------------|---------------------------------------------|
|                                       | Risk of Bias                         | Inconsistency            | Indirectness            | Imprecision          | Publication Bias | Overall Quality of Evidence                | With LMWH and VKA Therapy                                                                                             | With Rivaroxaban                                                                             | Relative Effect (95% CI)         | Risk With LMWH and VKA Therapy | Anticipated Absolute Effects                |
| 3,449 (1 study), 6-12 mo <sup>d</sup> | No serious risk of bias <sup>e</sup> | No serious inconsistency | No serious indirectness | Serious <sup>f</sup> | Undetected       | Moderate <sup>g,h</sup> due to imprecision | 49/1,718 (2.9)                                                                                                        | 38/1,731 (2.2)                                                                               | HR 0.67 (0.44-1.02)              | 29 per 1,000                   | 9 fewer per 1,000 (from 16 fewer to 1 more) |
| 3,449 (1 study), 6-12 mo <sup>d</sup> | No serious risk of bias <sup>e</sup> | No serious inconsistency | No serious indirectness | Serious <sup>f</sup> | Undetected       | Moderate <sup>g,h</sup> due to imprecision | 51/1,718 (3) <sup>h</sup>                                                                                             | 36/1,731 (2.1) <sup>h</sup>                                                                  | HR 0.68 (0.44-1.04)              | 30 per 1,000 <sup>h</sup>      | 9 fewer per 1,000 (from 17 fewer to 1 more) |
| 3,429 (1 study), 6-12 mo <sup>d</sup> | No serious risk of bias <sup>e</sup> | No serious inconsistency | No serious indirectness | Serious <sup>f</sup> | Undetected       | Moderate <sup>g,h</sup> due to imprecision | 19/1,711 (1.1) <sup>h</sup>                                                                                           | 13/1,718 (0.8) <sup>h</sup>                                                                  | HR 0.68 (0.34-1.35) <sup>h</sup> | 11 per 1,000 <sup>h</sup>      | 4 fewer per 1,000 (from 7 fewer to 4 more)  |
| ...                                   | ...                                  | ...                      | ...                     | ...                  | ...              | ...                                        | Warfarin: daily medication, dietary interactions, frequent blood testing/monitoring, increased hospital/clinic visits | Rivaroxaban: daily medication, no dietary interactions, no frequent blood testing/monitoring | ...                              | ...                            | ...                                         |

Bibliography: Einstein DVT.<sup>119</sup> HR = hazard ratio. See Table S1, S2, S5, and S7 legends for expansion of other abbreviations.

<sup>a</sup>Rivaroxaban 15 mg bid for 3 wk and then 20 mg/d for a total of 3 (12%), 6 (63%), or 12 (25%) months.

<sup>b</sup>Enoxaparin 1 mg/kg bid for ~8 d and then VKA therapy targeted to INR 2.5 for 3, 6, or 12 mo.

<sup>c</sup>Included patients had acute, symptomatic, objectively verified proximal DVT of the legs (unprovoked, 62%; cancer, 6%; previous VTE, 19%).

<sup>d</sup>Follow-up was prespecified to be 3 mo (12%), 6 mo (63%), or 12 mo (25%).

<sup>e</sup>Allocation was concealed. Patients, providers, and data collectors were not blinded, but outcome adjudicators were blinded. ITT analysis; 1.0% loss to follow-up. Not stopped early for benefit.

<sup>f</sup>CI includes values suggesting benefit or no effect; relatively low number of events.

<sup>g</sup>CI includes values suggesting benefit and harm.

<sup>h</sup>One definite or possible fatal VTE in rivaroxaban group and one in LMWH/VKA group.

<sup>i</sup>Bleeds contributing to death: one in the rivaroxaban group and five in the warfarin group.

<sup>j</sup>Calculated from reported data.

**Table S30—[Section 3.3] Evidence Profile: Rivaroxaban vs Placebo for Extended Anticoagulation of VTE<sup>a,b</sup>**

| Participants (Studies), Follow-up        | Quality Assessment                   |                          |                         |                                  |                  | Summary of Findings                       |                           |                          |                                                                                              |                           |                                                |
|------------------------------------------|--------------------------------------|--------------------------|-------------------------|----------------------------------|------------------|-------------------------------------------|---------------------------|--------------------------|----------------------------------------------------------------------------------------------|---------------------------|------------------------------------------------|
|                                          | Risk of Bias                         | Inconsistency            | Indirectness            | Imprecision                      | Publication Bias | Overall Quality of Evidence               | Study Event Rates (%)     |                          | Anticipated Absolute Effects                                                                 |                           |                                                |
|                                          |                                      |                          |                         |                                  |                  |                                           | With Placebo              | Rivaroxaban              | Relative Effect (95% CI)                                                                     | Risk With Placebo         | Risk Difference With Rivaroxaban (95% CI)      |
| 1,196 (1 study), 6 or 12 mo <sup>c</sup> | No serious risk of bias <sup>d</sup> | No serious inconsistency | No serious indirectness | Serious <sup>e</sup> imprecision | Undetected       | Moderate <sup>de</sup> due to imprecision | 2/594 (0.34)              | 1/602 (0.17)             | RR 0.49 (0.04-5.4) <sup>f</sup>                                                              | 3 per 1,000               | 2 fewer per 1,000 (from 3 fewer to 15 more)    |
| 1,196 (1 study), 6 or 12 mo <sup>e</sup> | No serious risk of bias <sup>d</sup> | No serious inconsistency | No serious indirectness | No serious imprecision           | Undetected       | High <sup>d</sup>                         | 42/594 (7.1) <sup>g</sup> | 8/602 (1.3) <sup>h</sup> | HR 0.18 (0.09-0.39)                                                                          | 71 per 1,000 <sup>i</sup> | 58 fewer per 1,000 (from 43 fewer to 64 fewer) |
| 1,188 (1 study), 6 or 12 mo              | No serious risk of bias <sup>d</sup> | No serious inconsistency | No serious indirectness | Serious <sup>h</sup> imprecision | Undetected       | Moderate <sup>dh</sup> due to imprecision | 0/590 (0) <sup>i</sup>    | 4/598 (0.7) <sup>j</sup> | RR 4.9 (0.58-42) <sup>f</sup>                                                                | i                         | 7 more per 1,000 (from 3 more to 16 more)      |
| ...                                      | ...                                  | ...                      | ...                     | ...                              | ...              | ...                                       | ...                       | ...                      | Rivaroxaban: daily medication, no dietary interactions, no frequent blood testing/monitoring | ...                       | ...                                            |
| ...                                      | ...                                  | ...                      | ...                     | ...                              | ...              | ...                                       | ...                       | ...                      | PTS (important outcome) not reported                                                         | ...                       | j                                              |

Bibliography: Einstein DVT.<sup>19</sup> See Table S1, S2, S5, S10, and S29 legends for expansion of abbreviations.

<sup>a</sup>Rivaroxaban 20 mg/d for 6 or 12 mo after initial long-term therapy.

<sup>b</sup>Included patients had acute, symptomatic, objectively verified proximal DVT of the legs or PE (unprovoked, 73%; cancer, 5%; previous VTE, 19%).

<sup>c</sup>Follow-up was prespecified to be 6 mo (60%) or 12 mo (40%).

<sup>d</sup>Allocation was concealed. Patients, providers, data collectors, and outcome adjudicators were blinded. ITT analysis; 0.2% loss to follow-up. Not stopped early for benefit.

<sup>e</sup>CI includes values suggesting benefit or no effect; relatively low number of events.

<sup>f</sup>Calculated from reported data with addition of one event to each event rate as event rate 0 in control group.

<sup>g</sup>One definite or possible fatal VTE in rivaroxaban group and one in LMWH/VKA group.

<sup>h</sup>CI includes values suggesting benefit and harm.

<sup>i</sup>Bleeds contributing to death: none in the rivaroxaban group and none in the warfarin group.

<sup>j</sup>PTS: baseline risk over 2 y of 58.8% for PTS and 13.8% for severe PTS (Kahn et al<sup>40</sup>). There is threefold (Prandoni et al<sup>20</sup>) to 10-fold (van Dongen et al<sup>21</sup>) increase in PTS with recurrent VTE in the ipsilateral leg.

**Table S31—[Section 3.3] Dabigatran vs VKA Therapy for Long-term Treatment of VTE<sup>a-c</sup>**

| Participants (Studies), Follow-up | Quality Assessment                   |                          |                         |                      |                  | Summary of Findings                        |                             |                          |                           |                                                                       |
|-----------------------------------|--------------------------------------|--------------------------|-------------------------|----------------------|------------------|--------------------------------------------|-----------------------------|--------------------------|---------------------------|-----------------------------------------------------------------------|
|                                   | Risk of Bias                         | Inconsistency            | Indirectness            | Imprecision          | Publication Bias | Overall Quality of Evidence                | Study Event Rates (%)       | Relative Effect (95% CI) | Risk With Warfarin        | Anticipated Absolute Effects Risk Difference With Dabigatran (95% CI) |
| 2,539 (1 study), 6 mo             | No serious risk of bias <sup>d</sup> | No serious inconsistency | No serious indirectness | Serious <sup>e</sup> | Undetected       | Moderate <sup>d,e</sup> due to imprecision | 21/1,265 (1.7)              | HR 0.98 (0.53-1.79)      | 17 per 1,000              | 0 fewer per 1,000 (from 8 fewer to 13 more)                           |
| 2,539 (1 study), 6 mo             | No serious risk of bias <sup>d</sup> | No serious inconsistency | No serious indirectness | Serious <sup>e</sup> | Undetected       | Moderate <sup>d,e</sup> due to imprecision | 24/1,265 (1.9) <sup>f</sup> | HR 1.01 (0.65-1.84)      | 19 per 1,000 <sup>g</sup> | 0 more per 1,000 (from 7 fewer to 16 more)                            |
| 2,539 (1 study), 6 mo             | No serious risk of bias <sup>d</sup> | No serious inconsistency | No serious indirectness | Serious <sup>e</sup> | Undetected       | Moderate <sup>d,e</sup> due to imprecision | 24/1,265 (1.9) <sup>g</sup> | HR 0.82 (0.45-1.48)      | 19 per 1,000 <sup>h</sup> | 3 fewer per 1,000 (from 10 fewer to 9 more)                           |

Death (important outcome)

Recurrent VTE (critical outcome)

Burden of anticoagulation (important outcome) not reported

Warfarin: daily medication, dietary restrictions, frequent blood testing/monitoring, increased hospital/clinic visits

Dabigatran: daily medication, No dietary restrictions, no frequent blood testing/monitoring, blood testing/monitoring

Bibliography: Schulman et al.<sup>122</sup> See Table S2, S5, and S29 legends for expansion of abbreviations.

<sup>a</sup>Dabigatran 150 mg bid taken orally for 6 mo after an initial treatment with LMWH or IV UFH.

<sup>b</sup>Warfarin adjusted to achieve an INR of 2.0 to 3.0 for 6 mo after an initial treatment with LMWH or IV UFH.

<sup>c</sup>Included patients had acute, symptomatic, objectively verified proximal DVT of the legs or PE.

<sup>d</sup>Allocation was concealed. Patients, providers, data collectors, and outcome adjudicators were blinded. Modified ITT analysis; 1.1% loss to follow-up. Not stopped early for benefit.

<sup>e</sup>CI includes values suggesting no effect and values suggesting either benefit or harm; relatively low number of events.

<sup>f</sup>One fatal VTE in dabigatran group and three fatal VTEs in warfarin group.

<sup>g</sup>One fatal major bleeding event in dabigatran group and one fatal major bleeding event in warfarin group.

**Table S32—[Section 4.1] Elastic Stocking for Prevention of PTS: Clinical Description and Results**

| Author/Year                          | Type of Publication  | Participants                                                                        | Interventions                                                                                                                                                                                                                                   | Outcomes                                                                       | Follow-up                                        | Results                                                                                                                                                                                                                   |
|--------------------------------------|----------------------|-------------------------------------------------------------------------------------|-------------------------------------------------------------------------------------------------------------------------------------------------------------------------------------------------------------------------------------------------|--------------------------------------------------------------------------------|--------------------------------------------------|---------------------------------------------------------------------------------------------------------------------------------------------------------------------------------------------------------------------------|
| Brandjes et al <sup>127</sup> /1997  | RCT                  | 194 patients with first symptomatic proximal DVT                                    | Compression stockings: below-knee customized elastic compression stockings with ankle pressure 30–40 mm Hg (96 patients)<br>Control group: no intervention (98 patients)                                                                        | Cumulative incidence of mild to moderate and severe PTS                        | 3 and 6 mo, then every 6 mo to a median of 76 mo | Compression stockings: Mild-moderate PTS: 20% (RR, 0.42; 95% CI 0.27-0.66; $P < .001$ ) Severe PTS: 11% (RR, 0.49; 95% CI, 0.25-0.95; $P < .001$ )<br>Control group: Mild-moderate PTS: 47% Severe PTS: 23%               |
| Ginsberg et al <sup>128</sup> /2001  | RCT                  | 47 asymptomatic patients with valvular incompetence 1 y post-DVT                    | Compression stockings: below-knee elastic compression stockings 20–30 mm Hg (24 patients)<br>Placebo: placebo stocking (23 patients)                                                                                                            | PTS symptoms                                                                   | 57 mo (mean)                                     | Compression stockings: PTS symptoms: 0%<br><br>Placebo: PTS symptoms: 4%                                                                                                                                                  |
| Prandoni et al <sup>20</sup> /2004   | RCT                  | 180 patients with first episode of symptomatic, acute proximal DVT                  | Compression stockings: below-knee elastic compression stockings 30–40 mm Hg (90 patients)<br>Control group: no intervention (90 patients)                                                                                                       | Cumulative incidence of mild to moderate and severe PTS                        | 3–5 y                                            | Compression stockings: PTS symptoms: 25% (CI, 15.6%–33.4%)<br><br>Control group: PTS symptoms: 49% (CI, 38.7%–59.4%)                                                                                                      |
| Partsch et al <sup>84</sup> /2004    | 2-y follow-up to RCT | 37 symptomatic patients with acute DVT followed long term                           | All anticoagulated with LMWH followed by oral anticoagulation<br>Inelastic bandages + early ambulation (13 patients)<br><br>Elastic stockings (30 mm Hg) + early ambulation (13 patients)<br><br>Bed rest for 9 d, no compression (11 patients) | Overall leg pain<br><br>Leg circumference<br><br>PTS score (Villalta-Prandoni) | 2 y                                              | Leg pain: No difference between groups<br><br>Calf circumference: No difference between groups<br>PTS score: Significantly better outcome with ambulation and bandaging or stockings compared with bed rest ( $P < .01$ ) |
| Ashwanden et al <sup>130</sup> /2008 | RCT, single center   | 169 first or recurrent proximal DVT without PTS after 6 mo of compression stockings | Compression stockings: below-knee, 26–36 mm Hg (84 patients)<br>Control group: stopped stockings (85 patients)                                                                                                                                  | PTS shin changes ( $\geq$ C4 on CEAP)                                          | 0–7 y (mean, 3 y)                                | PTS compression stockings: 13%<br><br>Control group: 20% HR: 0.8 (95 % CI, 0.3–1.3)                                                                                                                                       |

See Table S1, S2, S5, S10, and S29 legends for expansion of other abbreviations.

**Table S33—[Section 4.1] Elastic Stocking for Prevention of PTS: Methodologic Quality**

| Author/Year                          | Randomization | Allocation Concealment      | Blinding                                                          | Loss to Follow-up                                                                                     |
|--------------------------------------|---------------|-----------------------------|-------------------------------------------------------------------|-------------------------------------------------------------------------------------------------------|
| Brandjes et al <sup>127</sup> /1997  | Y             | Y (sealed envelopes)        | Patients: N<br>Caregivers: N<br>Assessors: Y<br>Data analysis: PY | Intervention group: 4 lost to follow-up, 19 died<br>Control group: 2 lost to follow-up, 18 died       |
| Ginsberg et al <sup>124</sup> /2001  | Y             | Probably, but not specified | Patients: Y<br>Caregivers: Y<br>Assessors: Y<br>data analysis: PY | Intervention: lost to follow-up not reported, 3 died<br>Control group: lost to follow-up not reported |
| Prandoni et al <sup>120</sup> /2004  | Y             | Y                           | Patients: N<br>caregivers: N<br>Assessors: Y<br>Data analysis: PY | Intervention: 2 lost to follow-up, 6 died<br>Control group: 13 lost to follow-up                      |
| Ashwanden et al <sup>130</sup> /2008 | Y             | Y                           | Patients: N<br>Caregivers: N<br>Assessors: N<br>Data analysis: N  | Intervention: 19 (described)<br>Control group: 13 (described)                                         |

See Table S5 legend for expansion of abbreviations.

**Table S34—[Section 4.1] Evidence Profile: Elastic Compression Stockings vs No Elastic Compression Stockings To Prevent PTS of the Leg<sup>a,b</sup>**

| Participants (Studies), Follow-up | Quality Assessment                                       |                            |                           |             |                                              | Summary of Findings         |                                       |                                     |                                                                            |                                                                   |
|-----------------------------------|----------------------------------------------------------|----------------------------|---------------------------|-------------|----------------------------------------------|-----------------------------|---------------------------------------|-------------------------------------|----------------------------------------------------------------------------|-------------------------------------------------------------------|
|                                   | Risk of Bias                                             | Inconsistency              | Indirectness              | Imprecision | Publication Bias                             | Overall Quality of Evidence | Study Event Rates (%)                 |                                     | Anticipated Absolute Effects                                               |                                                                   |
|                                   |                                                          |                            |                           |             |                                              |                             | With No Elastic Compression Stockings | With Elastic Compression Stockings  | Risk With No Elastic Compression Stockings                                 | Risk Difference With Elastic Compression Stockings (95% CI)       |
| 421 (2 studies), 2 y              | No serious<br>inconsistency                              | No serious<br>indirectness | No serious<br>imprecision | Undetected  | Moderate <sup>c</sup><br>due to risk of bias | 91/211 (43.1) <sup>d</sup>  | 41/210 (19.5)                         | RR 0.46<br>(0.34-0.63) <sup>e</sup> | 479 per 1,000 <sup>d,f</sup><br>(from 177 fewer to 316 fewer) <sup>g</sup> | 259 fewer per 1,000<br>(from 177 fewer to 316 fewer) <sup>g</sup> |
| 374 (2 studies), 5 y              | No serious<br>risk of bias <sup>h</sup><br>inconsistency | No serious<br>indirectness | Serious <sup>i</sup>      | Undetected  | Moderate <sup>hi</sup><br>due to imprecision | 26/188 (13.8)               | 26/186 (14)                           | RR 1.01<br>(0.61-1.67) <sup>e</sup> | 210 per 1,000 <sup>i</sup>                                                 | 2 more per 1,000<br>(from 82 fewer to 141 more)                   |
| 0 (0 <sup>k</sup> )               |                                                          |                            |                           |             |                                              | ...                         |                                       | ...                                 | See comment <sup>k</sup>                                                   |                                                                   |

**Bibliography:** Kollbach et al.<sup>123</sup> We excluded Ginsberg et al.<sup>124</sup> and Belcaro et al.<sup>125</sup> because they respectively randomized patients 7 and 12 mo after their DVT rather than at the time of the acute DVT. We also excluded Arpaia et al.<sup>126</sup> because they randomized patients to receive stockings at the time of diagnosis of DVT vs 2 wk later.<sup>126</sup> See Table S1 and S5 legends for expansion of abbreviations.

<sup>a</sup>Brandjes<sup>27</sup> used graded elastic compression stockings (40 mm Hg of pressure at the ankle, 36 mm Hg at the lower calf, and 21 mm Hg at the upper calf); stockings were applied 2 to 3 wk after the first episode of proximal DVT. Prandoni<sup>120</sup> used flat-knitted stockings (30–40 mm Hg of pressure at the ankle); stockings were started at hospital discharge an average of 1 wk after admission. In both studies, stockings were used for 2 y.

<sup>b</sup>Prandoni<sup>120</sup> excluded patients with recurrent ipsilateral DVT, preexisting leg ulcers, or signs of CVI, bilateral thrombosis, a short life expectancy, or a contraindication for use of stockings (eg, advanced-stage peripheral arterial insufficiency). Brandjes et al excluded patients with short life, paralysis of the leg, bilateral thrombosis, leg ulcers, or extensive varicosis.

<sup>c</sup>Patients were not blinded to the treatment assignment, and outcomes were partly based on subjective report of symptoms.

<sup>d</sup>In Prandoni,<sup>120</sup> most events occurred during the first 6 mo; the cumulative incidence of PTS in the control group was 40% after 6 mo, 47% after 1 y, and 49% after 2 y.

<sup>e</sup>The effect estimate shown here results from a meta-analysis (Mantel-Haenszel fixed-effects model) of the two relevant trials. A fixed-effects model was chosen because of the small number of studies available.

<sup>f</sup>This estimate is based on the findings of the VETO (Venous Thrombosis Outcomes) study.<sup>40</sup> This probably underestimates the PTS baseline risk given that overall, 52% of patients reported the current use of compression stockings during study follow-up.

<sup>g</sup>Severe PTS: assuming the same RR of 0.46 and a baseline risk of 8.1% over 2 y, the absolute reduction is 44 fewer severe PTS per 1,000 (from 30 fewer to 53 fewer) over 2 y.

<sup>h</sup>We did not rate down the quality of evidence for recurrent VTE for the lack of blinding because this a more objective outcome than PTS.

<sup>i</sup>CI includes both negligible effect and appreciable benefit or appreciable harm.

<sup>j</sup>This estimate is the mean of two estimates derived from two studies: 12.4% probable/definite VTE (Heit<sup>128</sup>) and 29.1% confirmed VTE (Prandoni<sup>120</sup>).

<sup>k</sup>This is an important outcome that should be considered in future studies.



**Table S35—[Section 4.2.1] Evidence Profile: Compression Stockings vs No Compression Stockings for Patients With PTS<sup>a,c</sup>**

| Participants (Studies), Follow-up | Quality Assessment   |                          |                         |                      |                         | Summary of Findings                                 |                               |                            |                                    |                                                     |
|-----------------------------------|----------------------|--------------------------|-------------------------|----------------------|-------------------------|-----------------------------------------------------|-------------------------------|----------------------------|------------------------------------|-----------------------------------------------------|
|                                   | Risk of Bias         | Inconsistency            | Indirectness            | Imprecision          | Publication Bias        | Overall Quality of Evidence                         | Study Event Rates (%)         |                            | Anticipated Absolute Effects       |                                                     |
|                                   | Serious <sup>e</sup> | No serious inconsistency | No serious indirectness | Serious <sup>f</sup> | Undetected <sup>g</sup> | Low <sup>h,i</sup> due to risk of bias, imprecision | With No Compression Stockings | With Compression Stockings | Risk With No Compression Stockings | Risk Difference With Compression Stockings (95% CI) |
| 115 (2 studies), 12-26 mo         | Serious <sup>e</sup> | No serious inconsistency | No serious indirectness | Serious <sup>f</sup> | Undetected <sup>g</sup> | Low <sup>h,i</sup> due to risk of bias, imprecision | 33/57 (57.9)                  | 32/58 (55.2)               | 579 per 1,000                      | 23 fewer per 1,000 (from 174 fewer to 179 more)     |
| ...                               | ...                  | ...                      | ...                     | ...                  | ...                     | Quality of life not reported                        | ...                           | ...                        | ...                                | ...                                                 |
| ...                               | ...                  | ...                      | ...                     | ...                  | ...                     | Recurrent VTE, not reported                         | ...                           | ...                        | ...                                | ...                                                 |
| ...                               | ...                  | ...                      | ...                     | ...                  | ...                     | Ulceration not reported <sup>h</sup>                | ...                           | ...                        | ...                                | ...                                                 |

Bibliography: Ginsberg 2001<sup>124</sup>, Frulla, 2005<sup>131</sup>. See Table S1, S2, S5, and S10 legends for expansion of abbreviations.

<sup>a</sup>Ginsberg et al: graduated compression stockings, 30-40 mm Hg (calf or thigh length, depending on symptoms). Patients were encouraged to wear stockings as much as possible during waking hours. Frulla (2005): below-knee graded elastic compression stockings (ECS) (30-40 mm Hg at the ankle). Patients in both arms of the study received hydroxyethylrutosides (HR) (we considered the ECS + HR vs HR comparison).

<sup>b</sup>Ginsberg et al: placebo stockings (calf or thigh length, depending on symptoms).

<sup>c</sup>Ginsberg et al included patients with PTS 1 y after chronic, typical proximal DVT. Frulla (2005) included patients with clinical symptoms and signs suggestive of PTS.

<sup>d</sup>Ginsberg et al reported treatment failure (defined a priori based on any of five clinical criteria, including symptoms and ulcer development). Treatment success refers to the absence of treatment failure. Frulla used the Villalta scale.

<sup>e</sup>Ginsberg et al: Adequacy of sequence generation and allocation concealment were unclear; patients and outcome assessors were adequately blinded; unclear whether analysis followed the ITT principle; unclear whether follow-up was complete. Frulla (2005): outcome assessors were blinded; follow-up was complete. ITT principle was adhered to, but sequence generation and allocation concealment were unclear, and patients were not blinded.

<sup>f</sup>Very small number of patients.

<sup>g</sup>Publication bias not detected but not ruled out given that we identified only one small study partially supported by industry (provision of graduated compression stockings).

<sup>h</sup>Indirect evidence from the CLOTS1 (Clots in Legs Or Socks after Stroke) trial suggests that compression stockings is associated with an RR of 4 for skin complications.

<sup>i</sup>Absence of ulcer included in the treatment success outcome in Ginsberg et al.

**Table S36—[Section 4.2.2] Evidence Profile: Intermittent Compression Device vs No Intermittent Compression Device for Patients With Severe PTS<sup>a-c</sup>**

| Participants (Studies),<br>Follow-up  | Quality Assessment                      |                                          |                                         |                      | Summary of Findings       |                                                    |                                                                  |                                      |                                                                                                                                                                                          |
|---------------------------------------|-----------------------------------------|------------------------------------------|-----------------------------------------|----------------------|---------------------------|----------------------------------------------------|------------------------------------------------------------------|--------------------------------------|------------------------------------------------------------------------------------------------------------------------------------------------------------------------------------------|
|                                       | Risk of Bias                            | Inconsistency                            | Indirectness                            | Imprecision          | Publication Bias          | Overall Quality of Evidence                        | Study Event Rates (%)<br>With No Intermittent Compression Device | With Intermittent Compression Device | Anticipated Absolute Effects<br>Risk With No Intermittent Compression Device (95% CI)<br>Risk Difference With Intermittent Compression Device (95% CI)                                   |
| 82 (2 studies <sup>d</sup> ),<br>8 wk | No serious<br>risk of bias <sup>e</sup> | No serious<br>inconsistency <sup>f</sup> | No serious<br>indirectness <sup>g</sup> | Serious <sup>h</sup> | Undetected <sup>i</sup>   | Moderate <sup>e-s</sup><br>due to<br>imprecision   | 41 <sup>d</sup>                                                  | 41 <sup>d</sup>                      | ...<br>The mean<br>symptomatic<br>relief in the<br>intervention groups<br>was 0.41 SDs<br>higher (0.02 lower<br>to 0.85 higher)                                                          |
| 0 (1 study <sup>d,j</sup> ),<br>8 wk  | No serious<br>risk of bias <sup>k</sup> | No serious<br>inconsistency              | No serious<br>indirectness <sup>g</sup> | Serious <sup>h</sup> | Undetected <sup>i,j</sup> | Moderate <sup>h,k,l</sup><br>due to<br>imprecision | ...<br>0                                                         | 0                                    | ...<br>The mean quality<br>of life in the<br>control groups<br>was 50.2<br>The mean<br>quality of life in the<br>intervention groups<br>was 2.3 higher<br>(1.04 lower to<br>5.64 higher) |

(Continued)

**Table S36—Continued**

| Participants (Studies), Follow-up | Quality Assessment |               |              |             |                              | Summary of Findings                     |                                      |                                              |                                                               |
|-----------------------------------|--------------------|---------------|--------------|-------------|------------------------------|-----------------------------------------|--------------------------------------|----------------------------------------------|---------------------------------------------------------------|
|                                   | Risk of Bias       | Inconsistency | Indirectness | Imprecision | Publication Bias of Evidence | Study Event Rates (%)                   |                                      | Anticipated Absolute Effects                 |                                                               |
|                                   |                    |               |              |             |                              | With No Intermittent Compression Device | With Intermittent Compression Device | Risk With No Intermittent Compression Device | Risk Difference With Intermittent Compression Device (95% CI) |
| ...                               | ...                | ...           | ...          | ...         | ...                          | ...                                     | ...                                  | ...                                          | ...                                                           |
| ...                               | ...                | ...           | ...          | ...         | ...                          | Recurrent VTE not reported <sup>h</sup> |                                      |                                              |                                                               |
| ...                               | ...                | ...           | ...          | ...         | ...                          | Ulceration not reported <sup>h</sup>    |                                      |                                              |                                                               |

Bibliography: Ginsberg 1999,<sup>132</sup> O'Donnell, 2008,<sup>133</sup> See Table S1, S5, and S10 legends for expansion of other abbreviations.

<sup>a</sup>Ginsberg et al: Extremity pump used bid for 20 min each session; 50 mm Hg (therapeutic pressure) for 1 mo. O'Donnell et al: Venowave lower-limb venous return assist device to wear for most of the day for 8 wk.

<sup>b</sup>Ginsberg et al: Extremity pump used bid for 20 min each session; 15 mm Hg (placebo pressure) for 1 mo. O'Donnell et al: Venowave lower-limb venous return assist device with no connection between motor and planar sheet for 8 wk.

<sup>c</sup>Patients with previous DVT with symptoms of severe PTS.

<sup>d</sup>Crossover RCTs.

<sup>e</sup>In both studies, sequence generation was adequate; patients were blinded. Analysis adhered to ITT principle, and there were no missing outcome data. In Ginsberg et al (but not in O'Donnell et al), outcome assessors were not blinded, and it was not clear whether allocation was concealed.

<sup>f</sup> $I^2 = 0\%$ .

<sup>g</sup>Some concerns with indirectness given relatively short follow-up (8 wk).

<sup>h</sup>Very small number of patients. CI includes both values suggesting no effect and values suggesting a beneficial effect.

<sup>i</sup>Publication bias not detected but not ruled out given that we identified only two small studies with one (Ginsberg et al) partially supported by industry (provision of devices).

<sup>j</sup>O'Donnell et al.

<sup>k</sup>Sequence generation was adequate; patients were blinded; analysis adhered to ITT principle; and there were no missing outcome data. However, outcome assessors were not blinded, and it was not clear whether allocation was concealed.

<sup>l</sup>Publication bias not detected but not ruled out given that we identified only one small study.

<sup>m</sup>O'Donnell et al indicated no cases of recurrent VTE by the end of this study but judged the follow-up period to be short.

<sup>n</sup>O'Donnell et al indicated that one patient in the control group developed a venous ulceration. Three other participants developed nonserious skin-related side effects. Indirect evidence from the CLOTS1 (Clots in Legs Or s/Toekings after Stroke) trial suggests that compression stockings are associated with an RR of 4 for skin complications: Common side effects are attributed to Venowave were heat sensation, skin irritation, and increased sweating.

**Table S37—[Section 4.3] Evidence Profile: Venoaactive Medication vs No Venoaactive Medication for Patients With PTS<sup>a,b</sup>**

| Participants (Studies), Follow-up                                                                                                                                                                                  | Quality Assessment                   |                                       |                         |                      | Summary of Findings     |                                                      |                                                         |                             |                          |                                                                     |                                                      |
|--------------------------------------------------------------------------------------------------------------------------------------------------------------------------------------------------------------------|--------------------------------------|---------------------------------------|-------------------------|----------------------|-------------------------|------------------------------------------------------|---------------------------------------------------------|-----------------------------|--------------------------|---------------------------------------------------------------------|------------------------------------------------------|
|                                                                                                                                                                                                                    | Risk of Bias                         | Inconsistency                         | Indirectness            | Imprecision          | Publication Bias        | Overall Quality of Evidence                          | Study Event Rates (%)<br>With No Venoaactive Medication | With Venoaactive Medication | Relative Effect (95% CI) | Anticipated Absolute Effects<br>Risk With No Venoaactive Medication | Risk Difference With Venoaactive Medication (95% CI) |
| Symptomatic relief (critical outcome; assessed with PTS score (Villalta scale) < 5 or decreased by 30% at 12 mo compared with baseline in Frulla et al; improved tiredness of the leg at 8 wk in de Jongste et al) | No serious risk of bias <sup>d</sup> | Serious <sup>e</sup>                  | No serious indirectness | Serious <sup>f</sup> | Undetected <sup>g</sup> | Low <sup>h,i</sup> due to inconsistency, imprecision | 39/82 (47.6)                                            | 44/81 (54.3)                | RR 1.14 (0.85-1.52)      | 476 per 1,000                                                       | 67 more per 1,000 (from 71 fewer to 247 more)        |
| ...                                                                                                                                                                                                                | ...                                  | ...                                   | ...                     | ...                  | ...                     | Quality of life not reported                         | ...                                                     | ...                         | ...                      | ...                                                                 | ...                                                  |
| ...                                                                                                                                                                                                                | ...                                  | ...                                   | ...                     | ...                  | ...                     | Recurrent VTE not reported                           | ...                                                     | ...                         | ...                      | ...                                                                 | ...                                                  |
| ...                                                                                                                                                                                                                | ...                                  | ...                                   | ...                     | ...                  | ...                     | Ulceration not reported                              | ...                                                     | ...                         | ...                      | ...                                                                 | ...                                                  |
| ...                                                                                                                                                                                                                | ...                                  | ...                                   | ...                     | ...                  | ...                     | Side effects (critical outcome)                      | ...                                                     | ...                         | ...                      | ...                                                                 | ...                                                  |
| 203 (2 studies)                                                                                                                                                                                                    | No serious risk of bias <sup>d</sup> | No serious inconsistency <sup>h</sup> | No serious indirectness | Serious <sup>f</sup> | Undetected <sup>g</sup> | Moderate <sup>d,h</sup> due to imprecision           | 5/82 (6.1%)                                             | 13/121 (10.7%)              | RR 2.04 (0.76-5.51)      | 61 per 1,000                                                        | 63 more per 1,000 (from 15 fewer to 275 more)        |

Bibliography: Frulla 2005<sup>131</sup> de Jongste 1989.<sup>134</sup> See Table S1, S5, and S10 legends for expansion of abbreviations.

<sup>a</sup>Included studies assessed rutosides; we excluded Monreal et al<sup>135</sup> because it compared two venoaactive medications.

<sup>b</sup>Patients with PTS and history of DVT in PTS leg.

<sup>c</sup>Investigators assessed other symptoms (pain, heaviness, swelling feeling, restless legs, and cramps) but did not report a composite score. The symptom we chose to report showed the most benefit; the effect estimates for the other symptoms ranged from 0.8 to 1.4, and none was statistically significant.

<sup>d</sup>In both studies, sequence generation and allocation concealment were unclear. Both studies blinded outcome assessors and had complete follow-up. Although de Jongste et al blinded patients, they did not adhere to the ITT principle and did not use a validated scale to measure symptomatic relief. Although Frulla (2005) adhered to the ITT principle, it did not blind patients.

<sup>e</sup>I<sup>2</sup> = 77%.

<sup>f</sup>Small number of patients. CI including both values suggesting harms and values suggesting benefits.

<sup>g</sup>Publication bias not detected but not ruled out given that we identified only two small studies, and it was unclear whether they were funded by industry.

<sup>h</sup>I<sup>2</sup> = 7%.

**Table S38—[Section 5.4] Evidence Profile: Fondaparinux vs IV UFH for Initial Anticoagulation of Acute PE<sup>a,c</sup>**

| Participants (Studies), Follow-up | Quality Assessment                   |                          |                         |                      | Summary of Findings |                                            |                             |                             |                                   |                                              |
|-----------------------------------|--------------------------------------|--------------------------|-------------------------|----------------------|---------------------|--------------------------------------------|-----------------------------|-----------------------------|-----------------------------------|----------------------------------------------|
|                                   | Risk of Bias                         | Inconsistency            | Indirectness            | Imprecision          | Publication Bias    | Overall Quality of Evidence                | Study Event Rates (%)       | Relative Effect (95% CI)    | Anticipated Absolute Effects Risk |                                              |
|                                   |                                      |                          |                         |                      |                     |                                            | With UFH                    | With Fondaparinux           | Risk With UFH                     | Difference With Fondaparinux (95% CI)        |
| 2,213 (1 study), 3 mo             | No serious risk of bias <sup>d</sup> | No serious inconsistency | No serious indirectness | Serious <sup>e</sup> | Undetected          | Moderate <sup>d,e</sup> due to imprecision | 48/1,110 (4.3)              | 57/1,103 (5.2)              | RR 1.20 (0.82-1.74)               | 9 more per 1,000 (from 8 fewer to 32 more)   |
| 2,213 (1 study), 3 mo             | No serious risk of bias <sup>d</sup> | No serious inconsistency | No serious indirectness | Serious <sup>e</sup> | Undetected          | Moderate <sup>d,e</sup> due to imprecision | 56/1,110 (5.0) <sup>f</sup> | 42/1,103 (3.8) <sup>f</sup> | RR 0.75 (0.51-1.12)               | 13 fewer per 1,000 (from 25 fewer to 6 more) |
| 2,213 (1 study), 3 mo             | No serious risk of bias <sup>d</sup> | No serious inconsistency | No serious indirectness | Serious <sup>e</sup> | Undetected          | Moderate <sup>d,e</sup> due to imprecision | 26/1,110 (2.3) <sup>g</sup> | 22/1,103 (2.0) <sup>g</sup> | RR 0.85 (0.49-1.49)               | 4 fewer per 1,000 (from 12 fewer to 11 more) |

Bibliography: Büller et al.<sup>136</sup> See Table S1, S2, S4, and S7 legends for expansion of abbreviations.

<sup>a</sup>Fondaparinux (5.0, 7.5, or 10.0 mg in patients weighing < 50, 50 to 100, or > 100 kg, respectively) SC once daily given for at least 5 days and until the use of VKAs resulted in an INR > 2.0.

<sup>b</sup>UFH continuous IV infusion (ratio of the aPTT to a control value, 1.5-2.5) given for at least 5 days and until the use of VKAs resulted in an INR > 2.0.

<sup>c</sup>All patients had acute symptomatic hemodynamically stable PE.

<sup>d</sup>Allocation was concealed. Patients, providers, and data collectors not blinded. Outcome adjudicators were blinded; 0.6% of randomized patients were lost to follow-up. Not stopped early for benefit.

<sup>e</sup>CI includes values suggesting no effect and values suggesting either benefit or harm; relatively low number of events.

<sup>f</sup>Sixteen fatal VTE in fondaparinux group and 15 fatal VTE in UFH group.

<sup>g</sup>Fourteen patients in the fondaparinux group and 12 in the LMWH group had a major bleeding during the initial period (6-7 d). Of these, one in the fondaparinux group and one in the UFH group were fatal.

**Table S39—[Section 5.5] Evidence Profile: Early Discharge vs Standard Discharge in the Treatment of Acute PE<sup>a,b</sup>**

| Participants (Studies), Follow-up | Quality Assessment   |                          |                         |                      |                  | Summary of Findings                                                                    |                         |                      |                              |                              |                                               |
|-----------------------------------|----------------------|--------------------------|-------------------------|----------------------|------------------|----------------------------------------------------------------------------------------|-------------------------|----------------------|------------------------------|------------------------------|-----------------------------------------------|
|                                   | Risk of Bias         | Inconsistency            | Indirectness            | Imprecision          | Publication Bias | Overall Quality of Evidence                                                            | Study Event Rates (%)   |                      | Anticipated Absolute Effects |                              |                                               |
|                                   |                      |                          |                         |                      |                  |                                                                                        | With Standard Discharge | With Early Discharge | Relative Effect (95% CI)     | Risk With Standard Discharge | Risk Difference With Early Discharge (95% CI) |
| 471 (2 studies), 3 mo             | Serious <sup>c</sup> | No serious inconsistency | No serious indirectness | Serious <sup>d</sup> | Undetected       | Mortality (critical outcome)<br>Moderate <sup>e,d</sup> due to imprecision             | 6/228 (2.6)             | 4/243 (1.6)          | RR 0.58 (0.17-1.97)          | 26 per 1,000                 | 11 fewer per 1,000 (from 22 fewer to 26 more) |
| 471 (2 studies), 3 mo             | Serious <sup>c</sup> | No serious inconsistency | No serious indirectness | Serious <sup>d</sup> | Undetected       | Nonfatal recurrent PE (critical outcome)<br>Moderate <sup>e,d</sup> due to imprecision | 2/228 (0.9)             | 3/243 (1.2)          | RR 1.23 (0.25-6.03)          | 9 per 1,000                  | 2 more per 1,000 (from 7 fewer to 44 more)    |
| 471 (2 studies), 3 mo             | Serious <sup>c</sup> | No serious inconsistency | No serious indirectness | Serious <sup>d</sup> | Undetected       | Major bleeding (critical outcome)<br>Moderate <sup>e,d</sup> due to imprecision        | 1/228 (0.4)             | 4/243 (1.6)          | RR 2.74 (0.45-16.71)         | 4 per 1,000                  | 8 more per 1,000 (from 2 fewer to 69 more)    |
| ...                               | ...                  | ...                      | ...                     | ...                  | ...              | Quality of life not reported                                                           | ...                     | ...                  | ...                          | ...                          | ...                                           |

Bibliography: Otero et al.<sup>137</sup>; Aujesky et al.<sup>138</sup> See Table S1, S2, and S5 legends for expansion of abbreviations.

<sup>a</sup>Mean length of hospital stay: 3.4 (SD 1.1) vs 9.3 (SD 5.7) in Otero et al and 0.5 (SD 1.0) vs 3.9 (SD 3.1) in Aujesky et al.

<sup>b</sup>The two RCTs included only patients with low risk: risk classes I or II on the Pulmonary Embolism Severity Index in Aujesky et al<sup>138</sup>; low risk on clinical prediction rule by Uresandi et al<sup>140</sup> in Otero et al.

<sup>c</sup>Otero et al: allocation concealed, no patients lost to follow-up, ITT analysis, no blinding of outcome assessors reported, study stopped early because the rate of short-term mortality was unexpectedly high in the early discharge group (2 [2.8%] vs 0 [0%]). Aujesky et al: unclear whether allocation was concealed, three (1%) patients had missing outcome data, ITT analysis, outcome adjudicators blinded, no early stoppage.

<sup>d</sup>CI includes both values suggesting no effect and values suggesting appreciable harm or appreciable benefit.

**Table S40—[Section 5.6.1] Evidence Profile: Systemic Thrombolytic Therapy vs Anticoagulation Alone in Patients With Acute PE<sup>a-d</sup>**

| Participants (Studies),<br>Follow-up | Quality Assessment   |                                       |                         |                      |                         | Summary of Findings                                                                                  |                                                     |                                                     |                                  |                                                                                       |
|--------------------------------------|----------------------|---------------------------------------|-------------------------|----------------------|-------------------------|------------------------------------------------------------------------------------------------------|-----------------------------------------------------|-----------------------------------------------------|----------------------------------|---------------------------------------------------------------------------------------|
|                                      | Risk of Bias         | Inconsistency                         | Indirectness            | Imprecision          | Publication Bias        | Overall Quality of Evidence                                                                          | Study Event Rates (%)                               |                                                     | Relative Effect (95% CI)         | Anticipated Absolute Effects                                                          |
|                                      |                      |                                       |                         |                      |                         |                                                                                                      | With Systemically Administered Thrombolytic Therapy | With Systemically Administered Thrombolytic Therapy |                                  |                                                                                       |
| 847 (12 studies),<br>30 d            | Serious <sup>e</sup> | No serious inconsistency <sup>f</sup> | No serious indirectness | Serious <sup>g</sup> | Undetected <sup>h</sup> | Mortality (critical outcome)<br>Low <sup>ch</sup> due to risk of bias and imprecision                | 26/423 (6.1)                                        | 15/424 (3.5)                                        | RR 0.7<br>(0.37-1.31)            | Low <sup>j</sup><br>11 per 1,000<br>3 fewer per 1,000<br>(from 7 fewer to 3 more)     |
|                                      |                      |                                       |                         |                      |                         |                                                                                                      | 30/404 (7.4)                                        | 18/397 (4.5)                                        | RR 0.7<br>(0.4-1.21)             | High <sup>j</sup><br>89 per 1,000<br>27 fewer per 1,000<br>(from 56 fewer to 28 more) |
| 801 (9 studies),<br>30 d             | Serious <sup>e</sup> | No serious inconsistency <sup>f</sup> | No serious indirectness | Serious <sup>g</sup> | Undetected <sup>h</sup> | Recurrent PE (important outcome)<br>Low <sup>ch</sup> due to risk of bias and imprecision            | 30/404 (7.4)                                        | 18/397 (4.5)                                        | RR 0.7<br>(0.4-1.21)             | Low <sup>j</sup><br>57 per 1,000<br>17 fewer per 1,000<br>(from 34 fewer to 12 more)  |
|                                      |                      |                                       |                         |                      |                         |                                                                                                      | 24/423 (5.7)                                        | 38/424 (9)                                          | RR 1.63<br>(1-2.68) <sup>i</sup> | Low <sup>m</sup><br>1 per 1,000<br>1 more per 1,000<br>(from 0 more to 2 more)        |
| 847 (12 studies),<br>10 d            | Serious <sup>e</sup> | No serious inconsistency <sup>f</sup> | No serious indirectness | Serious <sup>g</sup> | Undetected <sup>h</sup> | Major bleeding (critical outcome)<br>Moderate <sup>e,f,h,k</sup> due to risk of bias and imprecision | 24/423 (5.7)                                        | 38/424 (9)                                          | RR 1.63<br>(1-2.68) <sup>i</sup> | Low <sup>m</sup><br>1 more per 1,000<br>(from 0 more to 2 more)                       |
|                                      |                      |                                       |                         |                      |                         |                                                                                                      |                                                     |                                                     |                                  | (Continued)                                                                           |





**Table S41—[Section 5.6.1] Systemic Thrombolytic Therapy vs Anticoagulation Alone in Patients With Acute PE: Clinical Description and Results**

| Author/Year                               | Interventions                                                                                                                                                  | No. Patients Analyzed                       | Length of Follow-up | Recurrent DVT and PE (%) RR (95% CI)                             | Major Bleeding (%) RR (95% CI)                                   | Total Mortality (%) RR (95% CI)                                  | Comments                                                                                                                                                                                                                                                                                 |
|-------------------------------------------|----------------------------------------------------------------------------------------------------------------------------------------------------------------|---------------------------------------------|---------------------|------------------------------------------------------------------|------------------------------------------------------------------|------------------------------------------------------------------|------------------------------------------------------------------------------------------------------------------------------------------------------------------------------------------------------------------------------------------------------------------------------------------|
|                                           | SK + heparin vs heparin                                                                                                                                        |                                             |                     |                                                                  |                                                                  |                                                                  |                                                                                                                                                                                                                                                                                          |
| Tibbitt et al <sup>145</sup> /1974        | SK 600,000 units intrapulmonary followed by 100,000 units for 72 h<br>Heparin 5,000 units intrapulmonary followed by 2,500 units for 72 h                      | SK: 11/13 (84.6%)<br>Heparin: 12/17 (70.6%) | 72 h                | SK: 0/11<br>Heparin: 0/12                                        | SL: 1/11 (9.1%)<br>Heparin: 1/12 (8.3%)<br>RR 0.92 (0.06-12.95)  | SK: 0/11<br>Heparin: 0/12                                        | All hydrocortisone 100 mg and at 60 h of treatment warfarin initial dose 25 mg for 6 mo. Seven patients who failed to complete the treatment regimen were excluded from the analysis. Patients reporting major bleeding required a blood transfusion. Some 6-mo follow-up data available |
| Ly et al <sup>146</sup> /1978             | SK 250,000 units followed by 100,000 units/h for 72 h<br>Heparin 15,000 units followed by 1,250 units/h for 7 d                                                | SK: 14/14<br>Heparin: 11/11                 | 10 d                | SK: 1/14 (7.1%)<br>Heparin: 2/11 (18.2%)<br>RR 2.55 (0.26-24.56) | SK: 4/14 (28.6%)<br>Heparin: 2/11 (18.2%)<br>RR 0.64 (0.14-2.86) | SK: 1/14 (7.1%)<br>Heparin: 2/11 (18.2%)<br>RR 2.55 (0.26-24.56) | Primary outcome was angiographic reperfusion. Five of the 25 patients received nonrandomized therapy. Uncertain if deaths were in patients who were randomized or not randomized.                                                                                                        |
| Dotter et al <sup>145</sup> /1979         | SK 250,000 units followed by 100,000 units/h for 18-72 h<br>Heparin 1,500 units per kg for 2-7 d                                                               | SK: 15/15<br>Heparin: 16/16                 | In hospital         | SK: 0/15<br>Heparin: 1/16 (6.3%)<br>RR 2.82 (0.12-64.39)         | SK: 3/15 (20.0%)<br>Heparin: 4/16 (25.0%)<br>RR 1.25 (0.33-4.68) | SK: 1/15 (6.7%)<br>Heparin: 2/16 (12.5%)<br>RR 1.88 (0.19-18.60) | All: warfarin/VKA. Primary outcome was angiographic reperfusion (not clearly stated).                                                                                                                                                                                                    |
| Jerjes-Sanchez et al <sup>145</sup> /1995 | SK 1,500,000 units over 1 h followed by a bolus of heparin 10,000 units + constant infusion of 1,000 units/h<br>Heparin 10,000 units followed by 1,000 units/h | SK: 4/4<br>Heparin: 4/4                     | In hospital         | SK: 0/4 (0%)<br>Heparin: 4/4 (100%)<br>RR 9.00 (0.64-126.85)     | SK: 0/4 (0%)<br>Heparin: 0/4 (0%)                                | SK: 0/4 (0%)<br>Heparin: 4/4 (100%)<br>RR 9.00 (0.64-126.85)     | Primary outcome not stated. Trial stopped early for benefit. All patients had cardiogenic shock at randomization. Heparin-treated patients appear to have failed heparin therapy before randomization, whereas the SK patients had not.                                                  |

(Continued)

**Table S41—Continued**

| Author/Year                                | Interventions                                                                                                                                                 | No. Patients Analyzed                                                     | Length of Follow-up    | Recurrent DVT and PE (%), RR (95% CI)                                             | Major Bleeding (%), RR (95% CI)                                                   | Total Mortality (%), RR (95% CI)                                                  | Comments                                                                                                                                                     |
|--------------------------------------------|---------------------------------------------------------------------------------------------------------------------------------------------------------------|---------------------------------------------------------------------------|------------------------|-----------------------------------------------------------------------------------|-----------------------------------------------------------------------------------|-----------------------------------------------------------------------------------|--------------------------------------------------------------------------------------------------------------------------------------------------------------|
| Urokinase vs heparin                       |                                                                                                                                                               |                                                                           |                        |                                                                                   |                                                                                   |                                                                                   |                                                                                                                                                              |
| UPET Study Group et al <sup>147/1970</sup> | Urokinase: infusion of 2,000 CTA units/lb followed by 2,000 CTA units/lb per h                                                                                | Urokinase 82/82                                                           | 2 wk                   | Urokinase: 12/82 (14.6%)                                                          | Urokinase: 37/82 (45.1%)                                                          | Urokinase: 6/82 (7.3%)                                                            | All: heparin for a minimum of 5 d.<br>The major bleeding reported includes moderate + severe bleeding.<br>Angiographic follow-up data available up to 12 mo. |
| Heparin                                    |                                                                                                                                                               |                                                                           |                        |                                                                                   |                                                                                   |                                                                                   |                                                                                                                                                              |
|                                            | Heparin: infusion of 75 units/lb followed by 10 units/lb per h                                                                                                | 78/78                                                                     |                        | Heparin: 15/78 (19.2%)<br>RR 1.31 (0.66-2.63)                                     | Heparin: 21/78 (26.9%)<br>RR 0.60 (0.39-0.92)                                     | Heparin: 7/78 (8.9%)<br>RR 1.23 (0.43-3.49)                                       |                                                                                                                                                              |
| 7 d                                        |                                                                                                                                                               |                                                                           |                        |                                                                                   |                                                                                   |                                                                                   |                                                                                                                                                              |
| Marini et al <sup>147/1988</sup>           | High dose: urokinase 3,300,000 units over 12 h<br>Low dose: urokinase 800,000 units over 12 h daily for 3 d<br>Heparin 30,000 units/d for 7 d followed by OAC | High-dose urokinase: 10/10<br>Low-dose urokinase: 10/10<br>Heparin: 10/10 |                        | High-dose urokinase: 0/10<br>Low-dose urokinase: 0/10<br>Heparin: 0/10            | High-dose urokinase: 0/10<br>Low-dose urokinase: 0/10<br>Heparin: 0/10            | High-dose urokinase: 0/10<br>Low-dose urokinase: 0/10<br>Heparin: 0/10            | Primary outcome was lung scan perfusion.<br>Thrombolysis arms did not receive heparin.<br>All patients: OACs continued for 1 y.                              |
| rt-PA (alteplase) + heparin vs heparin     |                                                                                                                                                               |                                                                           |                        |                                                                                   |                                                                                   |                                                                                   |                                                                                                                                                              |
| Dalla-Volta et al <sup>148/1992</sup>      | rt-PA 10 mg followed by 90 mg over 2 h<br>Heparin 10,000 units followed by 1,750 units/h for 7-10 d                                                           | rt-PA alteplase: 20/20<br>Heparin: 16/16                                  | 30 d                   | rt-PA alteplase: 1/20 (5.0%)<br>Heparin: 0/16 RR 2.43 (0.11-55.89)                | rt-PA alteplase: 3/20 (15.0%)<br>Heparin: 2/16 (12.5%)<br>RR 1.20 (0.23-6.34)     | rt-PA alteplase: 2/20 (10.0%)<br>Heparin: 0/16 RR 4.05 (0.21-78.76)               | Primary outcome was angiographic reperfusion.                                                                                                                |
| Goldhaber et al <sup>149/1993</sup>        | rt-PA alteplase 100 mg over 2 h followed by heparin 1,000 units/h<br>Heparin 5,000 units followed by 1,000 units/h                                            | rt-PA: 46/46<br>Heparin: 55/55                                            | In hospital<br>14-21 d | rt-PA: 0/46<br>Heparin: 5/55 (9.1%)<br>RR 0.11 (0.01-1.91)                        | rt-PA: 3/46 (6.5%)<br>Heparin: 1/55 (1.8%)<br>RR 3.59 (0.39-33.33)                | rt-PA: 0/46<br>Heparin: 2/55 (3.6%)<br>RR 0.24 (0.01-4.84)                        | Primary outcome was echocardiographic right ventricular function.                                                                                            |
| 30 d                                       |                                                                                                                                                               |                                                                           |                        |                                                                                   |                                                                                   |                                                                                   |                                                                                                                                                              |
| Konstantinides et al <sup>150/2002</sup>   | Alteplase 100 mg followed by alteplase 90 mg over 2 h + heparin 1,000 units/h<br>Heparin 5,000 units followed by 1,000 units/h + placebo                      | Alteplase: 118/118<br>Heparin + placebo: 138/138                          |                        | Alteplase: 4/118 (3.4%)<br>Heparin + placebo: 4/138 (2.9%)<br>RR 1.17 (0.30-4.57) | Alteplase: 1/118 (0.8%)<br>Heparin + placebo: 5/138 (3.6%)<br>RR 0.23 (0.03-1.97) | Alteplase: 4/118 (3.4%)<br>Heparin + placebo: 3/138 (2.2%)<br>RR 1.56 (0.36-6.83) | Primary outcome was death or need for escalation of therapy (later decision could be made after unblinding).                                                 |

(Continued)

**Table S41—Continued**

| Author/Year                               | Interventions                                                                     | No. Patients Analyzed                                   | Length of Follow-up | Recurrent DVT and PE (%), RR (95% CI) | Major Bleeding (%), RR (95% CI)   | Total Mortality (%), RR (95% CI)   | Comments                                                                                                                      |
|-------------------------------------------|-----------------------------------------------------------------------------------|---------------------------------------------------------|---------------------|---------------------------------------|-----------------------------------|------------------------------------|-------------------------------------------------------------------------------------------------------------------------------|
| Levine et al <sup>169</sup> /1990         | rt-PA 0.6mg/kg over 2 min                                                         | rt-PA: 33/33                                            | 10 d                | rt-PA: 0/33                           | rt-PA: 0/33                       | rt-PA: 1/33 (3.0%)                 | Primary outcome was lung scan reperfusion                                                                                     |
|                                           | Placebo plus heparin 5,000 units followed by 30,000/d                             | Placebo: 25/25                                          |                     | Placebo: 0/25                         | Placebo: 0/25                     | Placebo: 0/25 RR 2.29 (0.10-54.06) |                                                                                                                               |
| PIOPED Investigators <sup>144</sup> /1990 | rt-PA 40-80 mg at 1 mg/min                                                        | rt-PA: 9/9                                              | 7 d                 | rt-PA: 0/9                            | rt-PA: 1/9 (11.1%)                | rt-PA: 0/9                         | Primary outcome not stated (serial angiographic and lung scans were assessed).                                                |
|                                           | Placebo + heparin (doses determined by physician)                                 | Placebo: 4/4                                            |                     | Placebo: 0/4                          | Placebo: 0/4 RR 1.50 (0.07-30.59) | Placebo: 0/4                       | Heparin doses determined by attending physician in both groups<br>One death occurred 19 d after treatment                     |
| Fasullo et al <sup>155</sup> /2011        | Alteplase 100 mg over 2 h                                                         | Alteplase: 37/37                                        | 10 d                | Alteplase: 0/37                       | Alteplase: 2/37 (5.4%)            | Alteplase: 0/37                    | All had right ventricular dysfunction. Primary outcome was echocardiographic changes.                                         |
|                                           |                                                                                   | Placebo + heparin 5,000 units followed by 1,000 units/h |                     | Placebo: 35/35                        | Placebo: 1/35 (2.9%)              | Placebo: 5/35 (14.2%)              | Three recurrent PE were fatal. One additional fatal and nonfatal PE in heparin arm by 180 d. No fatal or intracranial bleeds. |
| Tenecteplase + heparin vs heparin         |                                                                                   |                                                         |                     |                                       |                                   |                                    |                                                                                                                               |
| Becattini et al <sup>155</sup> /2010      | Tenecteplase: ~2 mg/kg bolus                                                      | Tenecteplase: 25/25                                     | 30 d                | Tenecteplase: 2/25                    | Tenecteplase: 2/25                | Tenecteplase: 0/25                 | All had right ventricular dysfunction. Primary outcome was echocardiographic changes.                                         |
|                                           | Placebo + heparin (80 International Units/kg and 18 International Units/kg per h) | Placebo: 32/32                                          |                     | Placebo: 1/32                         | Placebo: 1/32                     | Placebo: 1/32                      | No fatal PE or major bleeding; one intracranial bleed (tenecteplase).                                                         |

CTA = Committee on Thrombolytic Agents; OAC = oral anticoagulant; PIOPED = Prospective Investigation of Pulmonary Embolism Diagnosis; UPET = Urokinase Pulmonary Embolism Trial. See Table S1, S2, and S11 legends for expansion of other abbreviations.

**Table S42—[Section 5.6.1] Systemic Thrombolytic Therapy vs Anticoagulation Alone in Patients With Acute PE: Methodologic Quality**

| Author/Year                              | Intervention                                                                                                                                     | Study Design | Randomize |                                                                                                                           | Blinding                                   | Lost to Follow-up | Analysis                                                                                                            | Comments |
|------------------------------------------|--------------------------------------------------------------------------------------------------------------------------------------------------|--------------|-----------|---------------------------------------------------------------------------------------------------------------------------|--------------------------------------------|-------------------|---------------------------------------------------------------------------------------------------------------------|----------|
|                                          |                                                                                                                                                  |              | Concealed | SK + heparin vs heparin                                                                                                   |                                            |                   |                                                                                                                     |          |
| Tibbitt et al <sup>45</sup> /1974        | SK 600,000 units intrapulmonary followed by 100,000 units for 72 h                                                                               | RCT          | PY        | SK + heparin vs heparin<br>Patients: PY<br>Caregivers: PN<br>Data Collectors: PN<br>Adjudicators: PN<br>Data Analysts: PN | SK: 0/11 (0%)                              | Per protocol      | All hydrocortisone 100 mg and at 60 h of treatment, warfarin initial dose 25 mg for 6 mo.                           |          |
|                                          | Heparin 5,000 units intrapulmonary followed by 2,500 units for 72 h                                                                              |              |           |                                                                                                                           | Heparin: 0/12 (0%)                         |                   | Seven patients who failed to complete the treatment regimen were excluded from the analysis.                        |          |
| Lyet al <sup>46</sup> /1978              | SK 250,000 units followed by 100,000 units/h for 72 h                                                                                            | RCT          | CY        | Patients: PY<br>Caregivers: PN<br>Data Collectors: PN<br>Adjudicators: PN<br>Data Analysts: PN                            | SK: 0/14 (0%)                              | As treated        | Included 5 nonrandomized patients, and uncertain if deaths occurred in those who were randomized or not randomized. |          |
|                                          | Heparin 15,000 U followed by 1250 U/h for 7days                                                                                                  |              |           |                                                                                                                           | Heparin: 0/11 (0%)                         |                   |                                                                                                                     |          |
| Dotter et al <sup>45</sup> /1979         | SK 250,000 units followed by 100,000 units/h for 18-72 h                                                                                         | RCT          | PY        | Patients: PY<br>Caregivers: PN<br>Data Collectors: PN<br>Adjudicators: PN<br>Data Analysts: PN                            | SK plus heparin: 0/15 (0%)                 | ITT               |                                                                                                                     |          |
|                                          | Heparin 1,500 units per kg for 2-7 d                                                                                                             |              |           |                                                                                                                           | Heparin: 0/16 (0%)                         |                   |                                                                                                                     |          |
| Jerjes-Sanchez et al <sup>45</sup> /1995 | SK 1,500,000 units over 1 h followed by a bolus of heparin 10,000 units + constant infusion of 1,000 units/h                                     | RCT          | CY        | Patients: PY<br>Caregivers: PN<br>Data Collectors: PN<br>Adjudicators: PN<br>Data Analysts: PN                            | SK + heparin: 0/4 (0%)                     | ITT               |                                                                                                                     |          |
|                                          | Heparin 10,000 units followed by 1,000 units/h                                                                                                   |              |           |                                                                                                                           | Heparin: 0/4 (0%)                          |                   |                                                                                                                     |          |
| UPET Study Group <sup>41,46</sup> /1970  | Urokinase: infusion of 2,000 CTA units/lb followed by 2,000 CTA units/lb per h<br>Heparin: infusion of 75 units/lb followed by 10 units/lb per h | RCT          | CY        | Urokinase vs heparin<br>Patients: CY<br>Caregivers: CN<br>Data Collectors: CY<br>Adjudicators: CY<br>Data Analysts: CY    | Urokinase: 0/82 (0%)<br>Heparin: 0/78 (0%) | As treated        |                                                                                                                     |          |

(Continued)

**Table S42—Continued**

| Author/Year                              | Intervention                                                                          | Study Design | Randomize Concealed | Blinding                                                                                       | Lost to Follow-up              | Analysis | Comments                                                                                                             |
|------------------------------------------|---------------------------------------------------------------------------------------|--------------|---------------------|------------------------------------------------------------------------------------------------|--------------------------------|----------|----------------------------------------------------------------------------------------------------------------------|
| Marini et al <sup>147/1988</sup>         | High dose: urokinase 3,300,000 units over 12 h                                        | RCT          | PY                  | Patients: PN<br>Caregivers: CN<br>Data Collectors: PN<br>Adjudicators: PN<br>Data Analysts: PN | High-dose urokinase: 0/10 (0%) | ITT      |                                                                                                                      |
|                                          | Low dose: urokinase 800,000 units over 12 h daily for 3 d                             |              |                     |                                                                                                | Low-dose urokinase: 0/10 (0%)  |          |                                                                                                                      |
|                                          | Heparin 30,000 units/d for 7 d followed by OAC                                        |              |                     |                                                                                                | Heparin: 0/10 (0%)             |          |                                                                                                                      |
| rt-PA (alteplase) + heparin vs heparin   |                                                                                       |              |                     |                                                                                                |                                |          |                                                                                                                      |
| Dalla-Volta et al <sup>148/1992</sup>    | rt-PA (alteplase) 10 mg followed by 90 mg over 2 h                                    | RCT          | PY                  | Patients: PN<br>Caregivers: CN<br>Data Collectors: PN<br>Adjudicators: PN<br>Data Analysts: PN | rt-PA: 0/20 (0%)               | ITT      |                                                                                                                      |
|                                          | Heparin 10,000 units followed by 1,750 units/h for 7-10 d                             |              |                     |                                                                                                | Heparin: 0/16 (0%)             |          |                                                                                                                      |
| Goldhaber et al <sup>149/1993</sup>      | rt-PA 100 mg over 2 h followed by heparin 1,000 units/h                               | RCT          | CY                  | Patients: PN<br>Caregivers: CN<br>Data Collectors: PN<br>Adjudicators: PN<br>Data Analysts: PN | rt-PA: 0/46 (0%)               | ITT      |                                                                                                                      |
|                                          | Heparin 5,000 units followed by 1,000 units/h                                         |              |                     |                                                                                                | Heparin: 0/55 (0%)             |          |                                                                                                                      |
| Konstantinides et al <sup>150/2002</sup> | rt-PA (alteplase) 100 mg followed by alteplase 90 mg over 2 h + heparin 1,000 units/h | RCT          | CY                  | Patients: PY<br>Caregivers: CN<br>Data Collectors: PY<br>Adjudicators: PN<br>Data Analysts: PY | rt-PA: 0/118 (0%)              | ITT      | All: UFH 5,000 units.                                                                                                |
|                                          | Heparin 5,000 units followed by 1,000 units/h                                         |              |                     |                                                                                                | UFH: 0/138 (0%)                |          |                                                                                                                      |
| Levine et al <sup>160/1990</sup>         | rt-PA 0.6 mg/kg over 2 min                                                            | RCT          | PY                  | Patients: CY<br>Caregivers: CY<br>Data Collectors: CY<br>Adjudicators: CY<br>Data Analysts: CY | rt-PA: 0/33(0%)                | ITT      | All: UFH initial bolus of 5,000 units followed by continuous infusion at starting dose of 30,000 for the first 24 h. |
|                                          | Placebo + heparin 5,000 units followed by 30,000/d                                    |              |                     |                                                                                                | Heparin: 0/25(0%)              |          |                                                                                                                      |

(Continued)

**Table S42—Continued**

| Author/Year                             | Intervention                                                                                                          | Study Design | Randomize Concealed | Blinding                                                                                       | Lost to Follow-up                           | Analysis | Comments                                              |
|-----------------------------------------|-----------------------------------------------------------------------------------------------------------------------|--------------|---------------------|------------------------------------------------------------------------------------------------|---------------------------------------------|----------|-------------------------------------------------------|
| PIOPED Investigators <sup>14/1990</sup> | rt-PA 40-80mg at 1 mg/min                                                                                             | RCT          | PY                  | Patients: CY<br>Caregivers: CY<br>Data Collectors: PY<br>Adjudicators: PY<br>Data Analysts: PY | rt-PA: 0/9(0%)                              | ITT      | All: heparin doses determined by attending physician. |
| Fasullo et al <sup>15/2011</sup>        | Placebo plus heparin (doses determined by physician)<br>Alteplase 100 mg over 2 h                                     | RCT          | CY                  | Patients: CY<br>Caregivers: CY<br>Data Collectors: PY<br>Adjudicators: CY<br>Data Analysts: PY | Heparin: 0/4(0%)<br>rt-PA: 0/37             | ITT      | Primary outcome was echocardiographic changes.        |
| Becattini et al <sup>15/2010</sup>      | Tenecteplase: ~2 mg/kg bolus<br><br>Placebo + heparin (80 International Units/kg and 18 International Units/kg per h) | RCT          | CY                  | Patients: CY<br>Caregivers: CY<br>Data Collectors: CY<br>Adjudicators: CY<br>Data Analysts: PY | Heparin: 0/35<br><br>Tenecteplase: 0/28(0%) | ITT      | Primary outcome was echocardiographic changes.        |

See Table S1, S2, S5, S11, and S41 legends for expansion of other abbreviations.

**Table S43—[Section 8.1] Evidence Profile: Fondaparinux vs Placebo for Acute SVT<sup>a-c</sup>**

| Participants (Studies), Follow-up | Quality Assessment                   |                          |                         |                                   |                  | Summary of Findings                        |                                               |                   |                                   |                           |                                                                            |
|-----------------------------------|--------------------------------------|--------------------------|-------------------------|-----------------------------------|------------------|--------------------------------------------|-----------------------------------------------|-------------------|-----------------------------------|---------------------------|----------------------------------------------------------------------------|
|                                   | Risk of Bias                         | Inconsistency            | Indirectness            | Imprecision                       | Publication Bias | Overall Quality of Evidence                | Study Event Rates (%)<br>With No Fondaparinux | With Fondaparinux | Relative Effect (95% CI)          | Risk With No Fondaparinux | Anticipated Absolute Effects<br>Risk Difference With Fondaparinux (95% CI) |
| 3,002 (1 study), 3 mo             | No serious risk of bias <sup>d</sup> | No serious inconsistency | No serious indirectness | No serious Serious <sup>e,f</sup> | Undetected       | Mortality (important outcome)              | 1/1,500 (0.1)                                 | 2/1,502 (0.1)     | RR 1.99 (0.18-21.87)              | 4 per 1,000 <sup>h</sup>  | 4 more per 1,000 (from 3 fewer to 83 more)                                 |
|                                   |                                      |                          |                         |                                   |                  | Moderate <sup>d,g</sup> due to imprecision | 22/1,500 (1.5)                                | 4/1,502 (0.3)     | RR 0.18 (0.06-0.53)               | 33 per 1,000 <sup>h</sup> | 27 fewer per 1,000 (from 16 fewer to 31 fewer)                             |
| 3,002 (1 study), 3 mo             | No serious risk of bias <sup>d</sup> | No serious inconsistency | No serious indirectness | No serious imprecision            | Undetected       | VTE (critical outcome)                     | 26/1,500 (1.7)                                | 8/1,502 (0.5)     | RR 0.31 (0.14-0.68)               | 19 per 1,000 <sup>h</sup> | 13 fewer per 1,000 (from 6 fewer to 16 fewer)                              |
|                                   |                                      |                          |                         |                                   |                  | High <sup>d</sup> due to imprecision       | 26/1,500 (1.7)                                | 8/1,502 (0.5)     | RR 0.31 (0.14-0.68)               | 19 per 1,000 <sup>h</sup> | 13 fewer per 1,000 (from 6 fewer to 16 fewer)                              |
| 2,987 (1 study), 47 d             | No serious risk of bias <sup>d</sup> | No serious inconsistency | No serious indirectness | No serious Serious <sup>e,i</sup> | Undetected       | SVT recurrence (important outcome)         | 1/1,488 (0.1)                                 | 1/1,499 (0.1)     | RR 0.99 (0.06-15.86) <sup>h</sup> | 1 per 1,000               | 0 fewer per 1,000 (from 1 fewer to 10 more)                                |
|                                   |                                      |                          |                         |                                   |                  | Moderate <sup>d,j</sup> due to imprecision | 1/1,488 (0.1)                                 | 1/1,499 (0.1)     | RR 0.99 (0.06-15.86) <sup>h</sup> | 1 per 1,000               | 0 fewer per 1,000 (from 1 fewer to 10 more)                                |
|                                   |                                      |                          |                         |                                   |                  | Major bleeding (critical outcome)          |                                               |                   |                                   |                           |                                                                            |
|                                   |                                      |                          |                         |                                   |                  | Quality of life not measured               |                                               |                   |                                   |                           |                                                                            |

Bibliography: CALISTO study by Decousus et al.<sup>161</sup> CALISTO = Comparison of ARIXTRA™ in lower Limb Superficial Thrombophlebitis with placebo; SVT = superficial vein thrombosis. See Table S1 and S5 legends for expansion of other abbreviations.

<sup>a</sup>Fondaparinux 2.5 mg for 45 d.  
<sup>b</sup>Patients in the two treatment groups benefited from close clinical monitoring with adequate diagnostic procedures in the event of new and persistent symptoms.  
<sup>c</sup>Patients with infusion-related SVT were excluded if from CALISTO.  
<sup>d</sup>Allocation concealed. Outcome adjudicators, steering committee, patients, providers, and data collectors blinded. Follow-up rate was 98%. ITT analysis for efficacy outcomes. Not stopped early for benefit.  
<sup>e</sup>CI includes values suggesting large benefit and values suggesting large harm.  
<sup>f</sup>We rated down by only one level because the low event rate and large sample size.  
<sup>g</sup>Small number of events.  
<sup>h</sup>Baseline risk derived from a large prospective cohort study.<sup>162</sup>  
<sup>i</sup>The upper limit of the CI for absolute effect (10 more bleeds) is not low enough to suggest a clear balance of benefits vs harms.

**Table S44—[Section 8.1] Superficial Vein Thrombosis Treatment: Clinical Description and Results (Randomized Trials Comparing Treatments)**

| Author/Year                              | Type of Publication <sup>a</sup> | Participants                                                                                                          | Intervention <sup>b</sup>                                                                                                                                                                                                          | Outcomes <sup>c</sup>                                                                                                                                                                                              | Follow-up | Results                                                                                                                                                                                                                                                                                                                                                                                                                                                                                                                                                                                                                                                                                                                                                                                                                                                                                                                                                                                                                                                                               |
|------------------------------------------|----------------------------------|-----------------------------------------------------------------------------------------------------------------------|------------------------------------------------------------------------------------------------------------------------------------------------------------------------------------------------------------------------------------|--------------------------------------------------------------------------------------------------------------------------------------------------------------------------------------------------------------------|-----------|---------------------------------------------------------------------------------------------------------------------------------------------------------------------------------------------------------------------------------------------------------------------------------------------------------------------------------------------------------------------------------------------------------------------------------------------------------------------------------------------------------------------------------------------------------------------------------------------------------------------------------------------------------------------------------------------------------------------------------------------------------------------------------------------------------------------------------------------------------------------------------------------------------------------------------------------------------------------------------------------------------------------------------------------------------------------------------------|
| STENOX Study <sup>63</sup><br>Group/2003 | Parallel RCT,<br>multicenter     | 436 patients with<br>ultrasound-confirmed<br>acute symptomatic<br>SVT ( $\geq 5$ cm length)<br>of the lower extremity | Enoxaparin 40 mg SC daily<br>Enoxaparin 1.5 mg/kg SC daily<br>Tenoxicam, 20 mg po daily<br>Placebo once daily<br>All given for 8-12 d<br>All patients prescribed elastic<br>bandages or compression<br>stockings for at least 15 d | Day 12 (end of treatment):<br>Screening ultrasound or<br>symptomatic recurrence: VTE<br>SVT recurrence/extension to<br>saphenofemoral junction<br>3-mo VTE SVT recurrence/<br>extension<br>Major bleeding<br>Death | 3 mo      | VTE day 12: Placebo: 4/112 (3.6%) (PE 0)<br>Enoxaparin 40 mg: 1/110 (0.9%) (PE 0);<br>RR 0.25 (95% CI, 0.03-2.24)<br>Enoxaparin 1.5 mg/kg: 1/106 (0.9%)<br>(PE 0); RR 0.26 (95% CI, 0.03-2.33)<br>Tenoxicam: 2/99 (2.0%) (PE 1);<br>RR 0.57 (95% CI, 0.11-3.02)<br><i>P</i> = ns for all comparisons of active<br>treatment vs placebo<br>SVT recurrence/extension day 12:<br>Placebo: 33/112 (29.5%)<br>Enoxaparin 40 mg: 9/110 (8.3%);<br>RR 0.28 (95% CI, 0.14-0.55)<br>Enoxaparin 1.5 mg/kg: 6/106 (5.7%);<br>RR 0.19 (95% CI, 0.08-0.44)<br>Tenoxicam: 13/99 (13.1%); RR 0.45<br>(95% CI, 0.25-0.80)<br>VTE 3 mo:<br>Placebo: 5/112 (4.5%) (PE 0)<br>Enoxaparin 40 mg: 6/110 (5.7%); (PE 2);<br>RR 1.22 (95% CI, 0.38-3.89)<br>Enoxaparin 1.5mg/kg: 4/106 (3.9%)<br>(PE 0); RR 0.85 (95% CI, 0.23-3.06)<br>Tenoxicam: 4/99 (4.3%) (PE 1);<br>RR 0.91 (95% CI, 0.25-3.28)<br><i>P</i> = ns for all comparisons of active<br>treatment vs placebo<br>SVT recurrence/extension 3 mo: Placebo:<br>37/112 (33.0%)<br>Enoxaparin 40 mg: 16/110 (14.5%);<br>RR 0.44 (95% CI, 0.26-0.74) |

(Continued)



**Table S44—Continued**

| Author/Year                                                  | Type of Publication <sup>a</sup> | Participants                                                                   | Intervention <sup>b</sup>                                                                                                                                                                                                                    | Outcomes <sup>c</sup>                                                                                                                                                                      | Follow-up | Results                                                                                                                                                                                                                                                                                                                                                                                                                                                                                                                                                                                                                                                                                                                                                                                                                                                                                                                                         |
|--------------------------------------------------------------|----------------------------------|--------------------------------------------------------------------------------|----------------------------------------------------------------------------------------------------------------------------------------------------------------------------------------------------------------------------------------------|--------------------------------------------------------------------------------------------------------------------------------------------------------------------------------------------|-----------|-------------------------------------------------------------------------------------------------------------------------------------------------------------------------------------------------------------------------------------------------------------------------------------------------------------------------------------------------------------------------------------------------------------------------------------------------------------------------------------------------------------------------------------------------------------------------------------------------------------------------------------------------------------------------------------------------------------------------------------------------------------------------------------------------------------------------------------------------------------------------------------------------------------------------------------------------|
| Titon et al <sup>64</sup> /1994                              | Parallel RCT, multicenter        | 117 patients with ultrasound-confirmed SVT of the lower extremities            | Nadroparin fixed dose, 6,150 anti-Xa International Units daily<br><br>Nadroparin 31.5 anti-Xa International Units/kg SC daily<br>Naproxen 500 mg po daily<br><br>Treatments given for 6 d<br>All patients wore compression stockings for 7 d | Echocardiographic extension of thrombus at day 7 and at 8 wk<br><br>Changes in symptoms and clinical signs (warmth, flushing, edema, pain on palpation)<br>DVT<br><br>PE<br>Major bleeding | 8 wk      | Enoxaparin 1.5 mg/kg: 16/106 (15.1%); RR 0.46 (95% CI, 0.27-0.77)<br>Tenoxicam: 15/99 (15.2%); RR 0.46 (95% CI, 0.27-0.78)<br>Major bleeding: 0<br>Death: 0<br><br>Day 7 extension of thrombus: Fixed-dose nadroparin: 1/38 (2.6%)<br><br>Weight-based nadroparin: 2/40 (5%); RR 1.90 (95% CI, 0.18-20.1)<br><br>Naproxen: 1/39 (2.6%); RR 0.97 (95% CI, 0.06-15.02)<br><br><i>P</i> = ns<br>8-wk extension of thrombus or new SVT: Fixed-dose nadroparin: 2/36 (5.6%)<br>Weight-based nadroparin: 0/40 (0%); RR 0.18 (95% CI, 0.01-3.64)<br>Naproxen: 0/39 (0%); RR (95% CI) 0.19 (0.01-3.73)<br><br>No DVT, PE, or major bleeding in any group<br>Intensity of symptoms/signs: Overall improvement in score from day 0 to day 7:<br>Fixed-dose nadroparin: 79.1% improved<br>Weight-based nadroparin: 63.0% improved<br>Naproxen: 46.4% improved<br><i>P</i> ≤ .01 in favor of nadroparin vs naproxen; this difference was maintained at 8 wk |
| Prandoni for Vesalio Investigators Group <sup>65</sup> /2005 | Parallel RCT, multicenter        | 164 patients with ultrasound-confirmed acute SVT of the greater saphenous vein | High-dose weight-adjusted nadroparin (190 anti-Xa International Units/kg for 10 d followed by 95 anti-Xa International Units/kg for 20 d)                                                                                                    | Composite outcome of asymptomatic or symptomatic SVT extension, asymptomatic or symptomatic DVT, symptomatic PE at 3 mo                                                                    | 3 mo      | 3 mo follow-up:                                                                                                                                                                                                                                                                                                                                                                                                                                                                                                                                                                                                                                                                                                                                                                                                                                                                                                                                 |

(Continued)

**Table S44—Continued**

| Author/Year                          | Type of Publication <sup>a</sup> | Participants                                                                    | Intervention <sup>b</sup>                                                                                                                                    | Outcomes <sup>c</sup>                                                             | Follow-up | Results                                                                                                                                                                                                                                                                                                                                                                                                                                 |
|--------------------------------------|----------------------------------|---------------------------------------------------------------------------------|--------------------------------------------------------------------------------------------------------------------------------------------------------------|-----------------------------------------------------------------------------------|-----------|-----------------------------------------------------------------------------------------------------------------------------------------------------------------------------------------------------------------------------------------------------------------------------------------------------------------------------------------------------------------------------------------------------------------------------------------|
| Marchiori et al <sup>166</sup> /2002 | Parallel RCT, single center      | 60 patients with ultrasound-confirmed first acute SVT of greater saphenous vein | Low-dose UFH (5,000 International Units bid SC for 4 wk)<br><br>High-dose UFH (12,500 International Units for 1 wk then 10,000 International Units for 3 wk) | Improvement in clinical symptoms and signs at 1 mo<br>Major bleeding<br><br>Death | 6 mo      | SVT High dose: 2/83 (2.4%) (1 occurred while on treatment) Low dose: 5/81 (6.2%) (all occurred while on treatment) RR 2.56 (95% CI, 0.51-12.83)<br><br>VTE High dose: 4/83 (4.8%) (3 symptomatic events; 1 [PE] occurred while on treatment)<br>Low dose: 2/81 (2.5%) (both symptomatic DVT) RR 0.51 (95% CI, 0.10-2.72)<br><br>Rate of improvement in clinical symptoms and signs similar both groups<br>Major bleeding: 0<br>Death: 0 |
|                                      |                                  |                                                                                 | Low-dose UFH (5,000 International Units bid SC for 4 wk)                                                                                                     | VTE                                                                               | 6 mo      | VTE during treatment period: Low dose: 4/30 (13.3%) (3 asymptomatic DVT, 1 PE)                                                                                                                                                                                                                                                                                                                                                          |
|                                      |                                  |                                                                                 | High-dose UFH (12,500 International Units for 1 wk then 10,000 International Units for 3 wk)                                                                 | Extension/Recurrence of thrombosis<br>Major bleeding                              |           | High dose: 0/30 (0%); RR 0.11 (95% CI, 0.01-1.98; <i>P</i> = ns)                                                                                                                                                                                                                                                                                                                                                                        |
|                                      |                                  |                                                                                 | Use of concomitant systemic or local antiinflammatory drugs permitted but use not described                                                                  | HIT                                                                               |           |                                                                                                                                                                                                                                                                                                                                                                                                                                         |
|                                      |                                  |                                                                                 |                                                                                                                                                              | Death                                                                             |           | Extension/recurrence SVT during treatment period:<br>Low dose: 7/30 (23.3%)<br>High dose: 3/30 (10%); RR 0.40 (95% CI, 0.11-1.40; <i>P</i> = ns)                                                                                                                                                                                                                                                                                        |
|                                      |                                  |                                                                                 |                                                                                                                                                              |                                                                                   |           | Overall VTE during follow-up period:<br>Low dose: 6/30 (20%)<br>High dose: 1/30 (3.3%); RR 0.17 (95% CI, 0.02-1.30; <i>P</i> = ns)<br>Overall extension/recurrence SVT during follow-up period: Low dose: 11/30 (36.7%)<br>High dose: 8/30 (26.7%); RR 0.73 (95% CI, 0.34, 1.55; <i>P</i> = ns)                                                                                                                                         |

(Continued)

**Table S44—Continued**

| Author/Year                       | Type of Publication <sup>a</sup> | Participants                                                                               | Intervention <sup>b</sup>                                                                                                                                                                                                                                                                                                                                                                          | Outcomes <sup>c</sup>                                                   | Follow-up | Results                                                                                                                                                                                                                                                                                                                                                                                                                                                                                                                                                                                                                                                                                                                                                                                                                                                                                                                                        |
|-----------------------------------|----------------------------------|--------------------------------------------------------------------------------------------|----------------------------------------------------------------------------------------------------------------------------------------------------------------------------------------------------------------------------------------------------------------------------------------------------------------------------------------------------------------------------------------------------|-------------------------------------------------------------------------|-----------|------------------------------------------------------------------------------------------------------------------------------------------------------------------------------------------------------------------------------------------------------------------------------------------------------------------------------------------------------------------------------------------------------------------------------------------------------------------------------------------------------------------------------------------------------------------------------------------------------------------------------------------------------------------------------------------------------------------------------------------------------------------------------------------------------------------------------------------------------------------------------------------------------------------------------------------------|
| Belcaro et al <sup>67</sup> /1999 | Parallel RCT, multicenter        | 562 patients with ultrasound-confirmed SVT and large varicose veins or venous incompetence | A. Elastic compression stockings alone<br>B. Elastic compression stockings and simple flush ligation<br>C. Elastic compression stockings and complete stripping and perforator ligation<br>D. Elastic compression stockings and low-dose SC heparin<br>E. Elastic compression stockings and LMWH<br>F. Elastic compression stockings and VKA<br>Doses and duration of anticoagulants not specified | Extension of SVT at 3 mo<br>Extension of SVT at 6 mo<br>New DVT at 3 mo | 6 mo      | No major bleeding, HIT, or death in any group<br>Extension of thrombus at 3 mo: A: 32/78 (41%) B: 11/78 (14.1%); RR 0.34 (95% CI, 0.19-0.63) C: 0/70; RR 0.02 (95% CI, 0.00-0.27) D: 4/71 (5.6%); RR 0.14 (95% CI, 0.05-0.37) E: 4/76 (5.2%); RR 0.13 (95% CI, 0.05-0.35) F: 5/71 (7.0%); RR 0.17 (95% CI, 0.07-0.42)<br><br><i>P</i> < .05 for groups C, D, E, F vs A or B<br>Extension at 6 mo: A: 13/78 (16.7%) B: 6/78 (7.7%); RR 0.46 (95% CI, 0.18-1.15) C: 1/70 (1.4%); RR 0.09 (95% CI, 0.01-0.64) D: 2/71 (2.8%); RR 0.17 (95% CI, 0.04-0.72) E: 1/76 (1.3%); RR 0.08 (95% CI, 0.01-0.59) F: 5/71 (7%); RR 0.42 (95% CI, 0.16-1.13)<br><br><i>P</i> not stated<br>New DVT at 3 mo: A: 6/78 (7.7%) B: 2/78 (2.5%); RR 0.33 (95% CI, 0.07-1.60) C: 2/70 (2.8%); RR 0.37 (95% CI, 0.08-1.78) D: 0/71 (0%); RR 0.08 (95% CI, 0.0-1.47) E: 0/76 (0%); RR 0.08 (95% CI, 0.0-1.38) F: 0/71 (0%); RR 0.08 (95% CI, 0.0-1.47)<br><i>P</i> = ns |
| Lozano et al <sup>68</sup> /2003  | Parallel RCT, single center      | 60 patients with ultrasound-confirmed above-knee internal saphenous SVT                    | Saphenofemoral disconnection under local anesthesia with short-term use of a compression bandage                                                                                                                                                                                                                                                                                                   | Recurrence/extension of SVT<br>VTE<br>Complications of surgery          | 6 mo      | Recurrent SVT Surgical group: 1/30 (3.3%)<br>Enoxaparin group: 3/30 (10%); RR 3.0 (95% CI, 0.33-27.24)                                                                                                                                                                                                                                                                                                                                                                                                                                                                                                                                                                                                                                                                                                                                                                                                                                         |

(Continued)

**Table S44—Continued**

| Author/Year                        | Type of Publication <sup>a</sup>                                                        | Participants                                       | Intervention <sup>b</sup>                                                                                                                                                                                     | Outcomes <sup>c</sup>                    | Follow-up                                                                                                                                                                                                                                                                                                                                         | Results                                                                                                                                                                                                                                                                                                                                                                                               |
|------------------------------------|-----------------------------------------------------------------------------------------|----------------------------------------------------|---------------------------------------------------------------------------------------------------------------------------------------------------------------------------------------------------------------|------------------------------------------|---------------------------------------------------------------------------------------------------------------------------------------------------------------------------------------------------------------------------------------------------------------------------------------------------------------------------------------------------|-------------------------------------------------------------------------------------------------------------------------------------------------------------------------------------------------------------------------------------------------------------------------------------------------------------------------------------------------------------------------------------------------------|
| Sullivan et al <sup>69</sup> /2001 | Systematic review of 6 studies (includes Belcaro (14 patients) and 5 small case series) | Patients with objectively confirmed above-knee SVT | Outpatient enoxaparin 1 mg/kg bid for 1 wk then once daily for 3 wk<br><br>No placebo/control group<br><br>All patients were instructed to wear elastic compression stockings and used acetaminophen for pain | Major bleeding<br><br>Death<br><br>Costs | VTE Surgical group: 2/30 (6.7%) (both symptomatic PE) Enoxaparin group: 0/30 (0%); RR 0.20 (95% CI, 0.01-4.0)<br><br>Wound infections: Surgical group: 2/30 (6.7%)<br><br>Major bleeding: 0<br><br>Death: 0<br><br>Cost of treatment: Surgical group: \$ 1,400/patient; mean, 1.6 d in hospital Enoxaparin group: \$ 300/patient; 0 d in hospital |                                                                                                                                                                                                                                                                                                                                                                                                       |
|                                    |                                                                                         | Patients with objectively confirmed above-knee SVT | Ligation of greater saphenous vein at saphenofemoral junction with or without vein stripping (n = 246)                                                                                                        | SVT progression<br><br>DVT<br><br>PE     | Surgical group: 4-6 mo<br><br>Medical group: 6 d to 14 mo                                                                                                                                                                                                                                                                                         | SVT progression: Surgical group: 18/148 (12%) Medical group: 10/71 (14%); RR 1.16 (95% CI, 0.56-2.38)<br>DVT: Surgical group: 7/204 (3.4%) Medical group: 2/88 (2.2%) RR 0.66 (95% CI, 0.14-3.13)<br>PE: Surgical group: 2/98 (2.0%) Medical group: 0/17 (0%); RR 1.10 (95% CI, 0.06-21.98)<br>Surgical complications: 6/78 (7.7%) (hematoma, seroma, infection)<br>Bleeding complications: 0/17 (0%) |

(Continued)

**Table S44—Continued**

| Author/Year                          | Type of Publication <sup>a</sup> | Participants                              | Intervention <sup>b</sup>                                                                                                                             | Outcomes <sup>c</sup>                                                                                                                                                                                                  | Follow-up | Results                                                                                                                                                                                                                                                                                                                                                                                                                                                                                                                                                                                                                                                                                                                                                                                                   |
|--------------------------------------|----------------------------------|-------------------------------------------|-------------------------------------------------------------------------------------------------------------------------------------------------------|------------------------------------------------------------------------------------------------------------------------------------------------------------------------------------------------------------------------|-----------|-----------------------------------------------------------------------------------------------------------------------------------------------------------------------------------------------------------------------------------------------------------------------------------------------------------------------------------------------------------------------------------------------------------------------------------------------------------------------------------------------------------------------------------------------------------------------------------------------------------------------------------------------------------------------------------------------------------------------------------------------------------------------------------------------------------|
| Górski et al <sup>179</sup> /2005    | Parallel RCT, multicenter        | 46 patients with ultrasound-confirmed SVT | Topical liposomal heparin spray gel (4 sprays of 458 International Units tid)<br><br>Enoxaparin 40 mg SC once daily<br><br>Treatment given for 7-14 d | Pain by visual analog scale (0-10)<br><br>Area of erythema<br>Subjective efficacy assessment by investigator and patient<br>Duplex assessment for thrombus regression day 21<br><br>DVT<br><br>Adverse events<br>Death | 21 d      | Data extrapolated from graphs and figures in article by reviewer<br><br>Pain by visual analog scale, day 21: Topical heparin: 0 LMWH: 0<br>Improvement noted at each time point; no pain at 21 d, no significant difference between groups<br>Area of erythema: Improvement noted at each time point; no erythema at 21 d, no significant difference between groups<br>Subjective efficacy assessment: Majority of patients (> 75%) reported good or very good treatment efficacy; no significant difference between groups<br>Thrombus regression: Topical heparin: 10/21 (47.6%) LMWH: 9/23 (39.1%); RR 0.82 (95% CI, 0.42-1.62)<br>DVT: Topical heparin: 3/21 (14.3%) LMWH: 1/23 (4.3%); RR 0.30 (95% CI, 0.03-2.70)<br>Adverse events: Allergic reaction in 1 patient in enoxaparin group<br>Death: 0 |
| Andreozzi et al <sup>171</sup> /1996 | Parallel RCT, multicenter        | 56 patients with SVT of the lower limbs   | A: Dermatan sulfate 100 mg SC once daily<br><br>B: Dermatan sulfate 100 mg SC bid<br>C: Dermatan sulfate 200 mg intramuscular once daily              | Pain<br><br>Increase in functional ability<br>Local edema                                                                                                                                                              | 30 d      | Data extrapolated from graphs and figures in article by reviewer<br><br>Resolution of pain, day 30: Group A: 47% Group B: 83% Group C: 79%<br>P not stated                                                                                                                                                                                                                                                                                                                                                                                                                                                                                                                                                                                                                                                |

(Continued)

**Table S44—Continued**

| Author/Year | Type of Publication <sup>a</sup> | Participants | Intervention <sup>b</sup> | Outcomes <sup>c</sup> | Follow-up | Results                                                                                                                                                                                                                                                  |
|-------------|----------------------------------|--------------|---------------------------|-----------------------|-----------|----------------------------------------------------------------------------------------------------------------------------------------------------------------------------------------------------------------------------------------------------------|
|             |                                  |              | Treatment given for 30 d  |                       |           | Increase in ability to perform normal daily activities, day 30: Group A: 44% Group B: 67% Group C: 84%<br>$P < .05$ groups B and C vs group A<br>Local edema, day 30: Progressive improvement in all 3 groups; no significant differences between groups |

The CALISTO study that compared fondaparinux with no fondaparinux is described in Table 28 and Table S42. HIT = heparin-induced thrombocytopenia; NSAID = nonsteroidal antiinflammatory drug; STENOX = Superficial Thrombophlebitis Treated by Enoxaparin. See Table S1, S2, S5, S21, and S43 legends for expansion of other abbreviations.

<sup>a</sup>Study design: RCT, cohort.

<sup>b</sup>Drugs: VKA, UFH, LMWH, NSAIDs, aspirin, topical treatments, surgery vs placebo, no treatment, each other or different durations or regimens of the same agent.

<sup>c</sup>Outcomes: extension of thrombus, symptomatic relief, DVT and PE, major bleeding, surgical complications, and death.

**Table S45—[Section 8.1] SVT Treatment: Methodologic Quality**

| Author/Year                                           | Randomization                                                                                                                                   | Allocation Concealment                                      | Blinding                                          | Loss to Follow-up/ ITT              |
|-------------------------------------------------------|-------------------------------------------------------------------------------------------------------------------------------------------------|-------------------------------------------------------------|---------------------------------------------------|-------------------------------------|
| STENOX Study Group <sup>163</sup> /2003               | Central randomization                                                                                                                           | Visually identical drugs and packaging; triple dummy design | Investigators, patients, and assessors blinded    | 9 lost to follow-up/ ITT            |
| Titon et al <sup>164</sup> /1994                      | Randomized to one of three treatment groups; method of randomization not specified                                                              | Open label                                                  | Not blinded                                       | 8 lost to follow-up/ not specified  |
| Prandoni for Vesalio group et al <sup>165</sup> /2005 | Computer-generated random number sequence assigned to each patient to determine treatment group                                                 | Double dummy                                                | Patients and adjudicators of outcome events blind | 0 lost to follow-up/ ITT            |
| Marchiori et al <sup>166</sup> /2002                  | Randomized to treatment group by computer-generated list                                                                                        | Not specified                                               | Assessors blinded                                 | 0 lost to follow-up/ not specified  |
| Belcaro et al <sup>167</sup> /1999                    | Not specified                                                                                                                                   | Not blinded                                                 | Not blinded                                       | 118 lost to follow-up/not specified |
| Lozano et al <sup>168</sup> /2003                     | Method not specified                                                                                                                            | Not blinded                                                 | Not blinded                                       | 3 lost to follow-up/not specified   |
| Sullivan et al <sup>169</sup> /2001                   | Review of six studies; includes one RCT (Belcaro [14 patients]) and five small case series                                                      | N/A                                                         | N/A                                               | N/A                                 |
| Andreozzi et al <sup>170</sup> /1996                  | Patients randomly assigned to one of three therapeutic groups (method not specified)                                                            | Open label                                                  | Not blinded                                       | Not specified/not specified         |
| Górski et al <sup>171</sup> /2005                     | Performed according to a prespecified randomization list; treatment allocated according to next number on list; no stratification was performed | Open trial                                                  | Not blinded                                       | 6 lost to follow-up/ITT             |

See Table S5, S12, S43, and S44 legends for expansion of abbreviations.

**Table S46—[Section 9.1] Initial Treatment of Acute UEDVT With Anticoagulant Therapy: Clinical Description and Results (Randomized Trials [None Performed] and Prospective Observational Studies of at Least 20 Patients)**

| Author/Year                       | Type of Publication <sup>a</sup>                 | Participants                                       | Intervention <sup>b</sup>                                                                                                            | Outcomes <sup>c</sup>                                                             | Follow-up       | Results                                                                                                                                                                                                                                                                    |
|-----------------------------------|--------------------------------------------------|----------------------------------------------------|--------------------------------------------------------------------------------------------------------------------------------------|-----------------------------------------------------------------------------------|-----------------|----------------------------------------------------------------------------------------------------------------------------------------------------------------------------------------------------------------------------------------------------------------------------|
| Savage et al <sup>172/1999</sup>  | Prospective cohort, two center                   | 46 outpatients with UEDVT (includes 16 with CVC)   | Dalteparin daily for 5-7 d (200 International Units/kg) and VKA with target INR of 2.0-3.0<br>Duration of VKA not provided           | Symptomatic recurrence/extension of DVT<br>PE<br>Major bleeding<br>Death          | 3 mo            | Recurrence/extension DVT: 1/46 (2%)<br>PE: 0/46<br>Major bleeding: 1/46 (2%) (on VKA)<br>Death: 7/46 (15%) (none from PE or bleeding)                                                                                                                                      |
| Karabay et al <sup>173/2003</sup> | Prospective cohort, single center                | 36 inpatients with UEDVT (includes 13 with CVC)    | Nadroparin SC bid, 86 anti-Xa International Units/kg for up to 7 d, then VKA (started on day 3; target INR 2-2.5) for mean of 4.7 mo | Symptom relief<br>Lysis of thrombus on ultrasound<br>Recurrent DVT<br>PE<br>Death | 1 y             | Significant symptom relief, day 7: 32/36 (89%)<br>Lysis, day 10: $\geq$ 35%: 16/36 (45%)<br>< 35%: 17/36 (47%)<br>None: 3/36 (8%)<br>Recurrent DVT: 0/36<br>PE: 0/36<br>Death: 9/36 (25%) (none due to PE or bleeding)                                                     |
| Prandoni et al <sup>20/2004</sup> | Prospective cohort, number of centers not stated | 53 patients with first UEDVT (included 6 with CVC) | Therapeutic-dose heparin (81% received UFH, 19% received LMWH) then VKA (median, 3 mo)                                               | Recurrent VTE<br>Death                                                            | Median of 48 mo | Results not presented according to initial treatment with UFH vs LMWH<br>Recurrent VTE: 3/53 (5.7%)<br>(2 arm, 1 leg)<br>Cumulative incidence 1, 2, and 5 y: 2.0%, 4.2%, 7.7%<br>Death: 11/53 (20.8%) (due to cancer, PE, congestive heart failure [numbers not provided]) |

(Continued)



**Table S46—Continued**

| Author/Year                       | Type of Publication <sup>a</sup> | Participants                                          | Intervention <sup>b</sup>                                                                        | Outcomes <sup>c</sup>                                                                                | Follow-up | Results                                                                                                                                                           |
|-----------------------------------|----------------------------------|-------------------------------------------------------|--------------------------------------------------------------------------------------------------|------------------------------------------------------------------------------------------------------|-----------|-------------------------------------------------------------------------------------------------------------------------------------------------------------------|
| Kovacs et al <sup>174</sup> /2007 | Prospective cohort, multicenter  | 74 cancer patients with confirmed UEDVT (all had CVC) | Dalteparin daily for 5-7 d (200 International Units/kg) and VKA to achieve target INR of 2.0-3.0 | Recurrent VTE<br>PE<br>Major bleeding<br>Death<br>Catheter failure due to DVT or inability to infuse | 3 mo      | Recurrent VTE: 0/74<br>PE: 0/74<br>Major bleeding: 3/74 (4%)<br>Death: 7/74 (6 cancer, 1 major bleed)<br>Catheter failure due to DVT or inability to infuse: 0/74 |

CVC = central venous catheter; UEDVT = upper-extremity DVT. See Table S2, S7, and S41 legends for expansion of other abbreviations.

<sup>a</sup>Study design: prospective cohort studies.

<sup>b</sup>Drugs: IV UFH or LMWH followed by OACs.

<sup>c</sup>Outcomes: recurrent DVT and PE, major bleeding, total mortality, and early symptom relief.

**Table S47—[Section 9.1] Initial Treatment of Acute UEDVT With Anticoagulant Therapy: Methodologic Quality**

| Author/Year                         | Randomization | Allocation Concealment | Blinding | Loss to Follow-up/ ITT  |
|-------------------------------------|---------------|------------------------|----------|-------------------------|
| Savage et al <sup>172</sup> /1999   | N/A           | N/A                    | N/A      | 1 lost to follow-up/N/A |
| Karabay et al <sup>173</sup> /2003  | N/A           | N/A                    | N/A      | 0 lost to follow-up/N/A |
| Prandoni et al <sup>120</sup> /2004 | N/A           | N/A                    | N/A      | 2 lost to follow-up/N/A |
| Kovacs et al <sup>174</sup> /2006   | N/A           | N/A                    | N/A      | 0 lost to follow-up/N/A |

See Table S12 and S46 legends for expansion of abbreviations.

**Table S48—[Section 9.2] Initial Treatment of Acute UEDVT With Thrombolytic Therapy: Clinical Description and Results (Randomized Trials [None Performed] and Prospective Observational Studies of at Least 10 Patients)**

| Author/Year                      | Type of Publication <sup>a</sup>       | Participants                                                                                                         | Intervention <sup>b</sup>                                                           | Outcomes <sup>c</sup>                                                       | Follow-up | Results                                                                                             |
|----------------------------------|----------------------------------------|----------------------------------------------------------------------------------------------------------------------|-------------------------------------------------------------------------------------|-----------------------------------------------------------------------------|-----------|-----------------------------------------------------------------------------------------------------|
| Horne et al <sup>175</sup> /2000 | Prospective cohort, single center      | 18 patients with axillary or subclavian DVT                                                                          | Catheter-directed rt-PA (2 mg/cm of thrombus to maximum of 20 mg) then VKA for 3 mo | Immediate patency<br><br>Establishment of antegrade flow<br>Bleeding events | 6 mo      | Immediate patency: 10/18 (56%)<br><br>Antegrade flow: 11/18 (61%)<br>Bleeds (all minor): 5/18 (28%) |
| Lee et al <sup>176</sup> /2006   | Prospective case series, single center | 35 patients with primary UEDVT who had complete resolution of acute symptoms with CDT (n = 29) or IV heparin (n = 6) | Oral VKA for mean of 5.2 mo                                                         | Recurrent DVT                                                               | 54 mo     | Ipsilateral recurrent DVT: 8/35 (23%)                                                               |

Early prospective observational studies with < 10 patients and retrospective studies are described in Table 3 of the eighth edition of these guidelines.<sup>46</sup> See Table S2, S10, S11, and S46 legends for expansion of abbreviations.

<sup>a</sup>Study design: retrospective and prospective cohort studies.

<sup>b</sup>Drugs: thrombolytic therapy compared with different types of lytic therapy or with anticoagulants.

<sup>c</sup>Outcomes: recurrent DVT and PE, vein patency, major bleeding, total mortality, and PTS of the arm.

**Table S49—[Section 9.2] Initial Treatment of Acute UEDVT With Thrombolytic Therapy: Methodologic Quality**

| Author/Year                      | Randomization | Allocation Concealment | Blinding | Loss to Follow-up   |
|----------------------------------|---------------|------------------------|----------|---------------------|
| Horne et al <sup>175</sup> /2000 | No            | N/A                    | N/A      | Not specified       |
| Lee et al <sup>176</sup> /2006   | No            | N/A                    | N/A      | 0 lost to follow-up |

See Table S12 legend for expansion of abbreviation.

**Table S50—[Section 9.3] Long-term Treatment of Acute UEDVT: Clinical Description and Results**

| Author/Year                          | Type of Publication                                                   | Participants                                                 | Intervention <sup>a</sup>                                                                                                               | Outcomes <sup>b</sup>                                                                    | Follow-up       | Results                                                                                                                                                                                                            |
|--------------------------------------|-----------------------------------------------------------------------|--------------------------------------------------------------|-----------------------------------------------------------------------------------------------------------------------------------------|------------------------------------------------------------------------------------------|-----------------|--------------------------------------------------------------------------------------------------------------------------------------------------------------------------------------------------------------------|
| Savage et al <sup>172/1999</sup>     | Prospective cohort, two center                                        | 46 outpatients with confirmed UEDVT (includes 16 with CVC)   | Dalteparin 200 International Units/kg daily for 5-7 d and VKA to achieve target INR of 2.0-3.0 for 3 mo<br>Duration of VKA not provided | Symptomatic recurrence/extension of DVT<br>PE<br>Major bleeding<br>Death                 | 3 mo            | Recurrence/extension: 1/46 (2%)<br>PE: 0<br>Major bleeding: 1/46 (2%) (on VKA)<br>Death: 7/46 (15%) (none from PE or bleeding)                                                                                     |
| Karabay et al <sup>173/2003</sup>    | Prospective cohort, single center                                     | 36 inpatients with confirmed UEDVT (includes 13 with CVC)    | Nadroparin SC bid, 86 anti-Xa International Units/kg for up to 7 d, then VKA (started on day 3; target INR 2-2.5) for mean of 4.7 mo    | Symptom relief<br>Lysis of thrombus on ultrasound<br>Recurrent DVT<br>PE<br>Death<br>PTS | 1 y             | Significant symptom relief, day 7: 32/36 (89%)<br>Lysis, day 10: ≥ 35%: 16/36 (45%) < 35%: 17/36 (47%)<br>None: 3/36 (8%)<br>Recurrent DVT: 0<br>PE: 0<br>Death: 9/36 (25%) (none due to PE or bleeding)<br>PTS: 0 |
| Martinelli et al <sup>177/2004</sup> | Case-control study with prospective follow-up of cases, single center | 98 patients with primary UEDVT (none with CVC)               | VKA for mean 6 mo (77 patients), heparin SC (14 patients), or antiplatelet agents (7 patients) for ≤ 3 mo                               | Recurrent VTE after anticoagulants stopped                                               | Median of 5.1 y | Recurrent VTE: 12/98 (12%) overall (all UEDVT)<br>Annual incidence recurrent VTE: 2.4% (95% CI, 1.2%-4.0%) (results not provided by treatment group)                                                               |
| Prandoni et al <sup>178/2004</sup>   | Prospective cohort, number of centers not stated                      | 53 patients with confirmed first UEDVT (included 6 with CVC) | Therapeutic-dose heparin (81% received UFH, 19% received LMWH) then VKA (median, 3 mo)                                                  | Recurrent VTE                                                                            | Median of 48 mo | Results not presented according to initial treatment with UFH vs LMWH                                                                                                                                              |

(Continued)

**Table S50—Continued**

| Author/Year                       | Type of Publication             | Participants                                          | Intervention <sup>a</sup>                                                                      | Outcomes <sup>b</sup> | Follow-up | Results                                                                                                                                                                                                                                                                                                                                                                                                                                                     |
|-----------------------------------|---------------------------------|-------------------------------------------------------|------------------------------------------------------------------------------------------------|-----------------------|-----------|-------------------------------------------------------------------------------------------------------------------------------------------------------------------------------------------------------------------------------------------------------------------------------------------------------------------------------------------------------------------------------------------------------------------------------------------------------------|
| Kovacs et al <sup>174</sup> /2007 | Prospective cohort, multicenter | 74 cancer patients with confirmed UEDVT (all had CVC) | Dalteparin 200 International Units/kg daily for 5-7 d and VKA to achieve target INR of 2.0-3.0 | Death<br>PTS          | 3 mo      | <p>Recurrent VTE: 3/53 (5.7%) (2 arm, 1 leg)</p> <p>Cumulative incidence 1, 2, and 5 y: 2.0%, 4.2%, 7.7%</p> <p>Death: 11/53 (20.8%) (due to cancer, PE, congestive heart failure [breakdown not provided])</p> <p>PTS: 13/53 (24.5%); 2 y</p> <p>Cumulative incidence: 27.3%</p> <p>Recurrent VTE: 0</p> <p>PE: 0</p> <p>Major bleeding: 3 (4%)</p> <p>Death: 7 (6 cancer, 1 major bleed)</p> <p>Catheter failure due to DVT or inability to infuse: 0</p> |

Early prospective observational studies with < 20 patients, and retrospective studies, are described in Table 3 of the Eight edition of these guidelines<sup>86</sup>. See Table S2, S7, S10, and S46 legends for expansion of abbreviations.

<sup>a</sup>Drugs: VKA, UFH, LMWH vs placebo, control or each other.

<sup>b</sup>Outcomes: recurrent DVT and PE, major bleeding, total mortality, and PTS of the arm.

**Table S51—[Section 9.3] Long-term Treatment of Acute UEDVT: Methodologic Quality**

| Author/Year                           | Randomization | Allocation Concealment | Blinding | Loss to Follow-up            |
|---------------------------------------|---------------|------------------------|----------|------------------------------|
| Savage et al <sup>172</sup> /1999     | N/A           | N/A                    | N/A      | 1 lost to follow-up          |
| Karabay et al <sup>173</sup> /2003    | N/A           | N/A                    | N/A      | 0 lost to follow-up          |
| Martinelli et al <sup>177</sup> /2004 | N/A           | N/A                    | N/A      | Not specified                |
| Prandoni et al <sup>178</sup> /2004   | N/A           | N/A                    | N/A      | 2 patients lost to follow-up |
| Kovacs et al <sup>174</sup> /2007     | N/A           | N/A                    | N/A      | 0 lost to follow-up          |

See Table S12 and S46 legends for expansion of abbreviations.

## REFERENCES

- Brandjes DPM, Heijboer H, Büller HR, de Rijk M, Jagt H, ten Cate JW. Acenocoumarol and heparin compared with acenocoumarol alone in the initial treatment of proximal-vein thrombosis. *N Engl J Med.* 1992;327(21):1485-1489.
- Gallus AS, Jackaman J, Tillett J, Mills W, Wycherley A. Safety and efficacy of warfarin started early after submassive venous thrombosis or pulmonary embolism. *Lancet.* 1986;2(8519):1293-1296.
- Hull RD, Raskob GE, Rosenbloom D, et al. Heparin for 5 days as compared with 10 days in the initial treatment of proximal venous thrombosis. *N Engl J Med.* 1990;322(18):1260-1264.
- Leroyer C, Bressollette L, Oger E, et al; The ANTENOX Study Group. Early versus delayed introduction of oral vitamin K antagonists in combination with low-molecular-weight heparin in the treatment of deep vein thrombosis: a randomized clinical trial. *Haemostasis.* 1998;28(2):70-77.
- Mohiuddin SM, Hilleman DE, Destache CJ, Stoysich AM, Gannon JM, Sketch MH Sr. Efficacy and safety of early versus late initiation of warfarin during heparin therapy in acute thromboembolism. *Am Heart J.* 1992;123(3):729-732.
- van Dongen CJJ, van den Belt AG, Prins MH, Lensing AW. Fixed dose subcutaneous low molecular weight heparins versus adjusted dose unfractionated heparin for venous thromboembolism. *Cochrane Database Syst Rev.* 2004;(4):CD001100.
- Bredin HK, Hach-Wunderle V, Nakov R, Kakkar VV; CORTES Investigators. Clivarin: Assessment of Regression of Thrombosis, Efficacy, and Safety. Effects of a low-molecular-weight heparin on thrombus regression and recurrent thromboembolism in patients with deep-vein thrombosis. *N Engl J Med.* 2001;344(9):626-631.
- Decousus H, Leizorovicz A, Parent F, et al. A clinical trial of vena caval filters in the prevention of pulmonary embolism in patients with proximal deep-vein thrombosis. Prévention du Risque d'Embolie Pulmonaire par Interruption Cave Study Group. *N Engl J Med.* 1998;338(7):409-415.
- Fiessinger JN, Lopez-Fernandez M, Gatterer E, et al. Once-daily subcutaneous dalteparin, a low molecular weight heparin, for the initial treatment of acute deep vein thrombosis. *Thromb Haemost.* 1996;76(2):195-199.
- Harenberg J, Schmidt JA, Koppenhagen K, Tolle A, Huisman MV, Büller HR; EASTERN Investigators. Fixed-dose, body weight-independent subcutaneous LMW heparin versus adjusted dose unfractionated intravenous heparin in the initial treatment of proximal venous thrombosis. *Thromb Haemost.* 2000;83(5):652-656.
- Hull RD, Raskob GE, Pineo GF, et al. Subcutaneous low-molecular-weight heparin compared with continuous intravenous heparin in the treatment of proximal-vein thrombosis. *N Engl J Med.* 1992;326(15):975-982.
- Kirchmaier CM, Wolf H, Schäfer H, Ehlers B, Bredin HK; Certoparin-Study Group. Efficacy of a low molecular weight heparin administered intravenously or subcutaneously in comparison with intravenous unfractionated heparin in the treatment of deep venous thrombosis. *Int Angiol.* 1998;17(3):135-145.
- Koopman MMW, Prandoni P, Piovella F, et al; The Tasman Study Group. Treatment of venous thrombosis with intravenous unfractionated heparin administered in the hospital as compared with subcutaneous low-molecular-weight heparin administered at home. *N Engl J Med.* 1996;334(11):682-687.
- Levine M, Gent M, Hirsh J, et al. A comparison of low-molecular-weight heparin administered primarily at home with unfractionated heparin administered in the hospital for proximal deep-vein thrombosis. *N Engl J Med.* 1996;334(11):677-681.
- Lindmarker P, Holmström M, Granqvist S, Johnsson H, Lockner D. Comparison of once-daily subcutaneous Fragmin with continuous intravenous unfractionated heparin in the treatment of deep vein thrombosis. *Thromb Haemost.* 1994;72(2):186-190.
- Merli G, Spiro TE, Olsson CG, et al; Enoxaparin Clinical Trial Group. Subcutaneous enoxaparin once or twice daily compared with intravenous unfractionated heparin for treatment of venous thromboembolic disease. *Ann Intern Med.* 2001;134(3):191-202.
- Prandoni P, Lensing AWA, Büller HR, et al. Comparison of subcutaneous low-molecular-weight heparin with intravenous standard heparin in proximal deep-vein thrombosis. *Lancet.* 1992;339(8791):441-445.
- Riess H, Koppenhagen K, Tolle A, et al; TH-4 Study Group. Fixed-dose, body weight-independent subcutaneous low molecular weight heparin Certoparin compared with adjusted-dose intravenous unfractionated heparin in patients with proximal deep venous thrombosis. *Thromb Haemost.* 2003;90(2):252-259.
- Simonneau G, Charbonnier B, Decousus H, et al. Subcutaneous low-molecular-weight heparin compared with continuous intravenous unfractionated heparin in the treatment of proximal deep vein thrombosis. *Arch Intern Med.* 1993;153(13):1541-1546.
- Simonneau G, Sors H, Charbonnier B, et al. A comparison of low-molecular-weight heparin with unfractionated heparin for acute pulmonary embolism. The THESEE Study Group. Tinzaparine ou Heparine Standard: Evaluations dans l'Embolie Pulmonaire. *N Engl J Med.* 1997;337(10):663-669.
- Lopaciuk S, Meissner AJ, Filipecki S, et al. Subcutaneous low molecular weight heparin versus subcutaneous unfractionated heparin in the treatment of deep vein thrombosis: a Polish multicenter trial. *Thromb Haemost.* 1992;68(1):14-18.
- Faivre R, Neuhart Y, Kieffer Y, et al. A new treatment of deep venous thrombosis: low molecular weight heparin fractions. Randomized study [in French]. *Presse Med.* 1988;17(5):197-200.
- Prandoni P, Carnovali M, Marchiori A; Galilei Investigators. Subcutaneous adjusted-dose unfractionated heparin vs fixed-dose low-molecular-weight heparin in the initial treatment of venous thromboembolism. *Arch Intern Med.* 2004;164(10):1077-1083.
- Kearon C, Ginsberg JS, Julian JA, et al; Fixed-Dose Heparin (FIDO) Investigators. Comparison of fixed-dose weight-adjusted unfractionated heparin and low-molecular-weight heparin for acute treatment of venous thromboembolism. *JAMA.* 2006;296(8):935-942.
- Büller HR, Davidson BL, Decousus H, et al; Matisse Investigators. Fondaparinux or enoxaparin for the initial treatment of symptomatic deep venous thrombosis: a randomized trial. *Ann Intern Med.* 2004;140(11):867-873.
- van Dongen CJ, MacGillavry MR, Prins MH. Once versus twice daily LMWH for the initial treatment of venous thromboembolism. *Cochrane Database Syst Rev.* 2005;(3):CD003074.
- Holmström M, Berglund MC, Granqvist S, Bratt G, Törnebohm E, Lockner D. Fragmin once or twice daily subcutaneously in the treatment of deep venous thrombosis of the leg. *Thromb Res.* 1992;67(1):49-55.
- Charbonnier BA, Fiessinger JN, Banga JD, Wenzel E, d'Azemar P, Sagnard L. Comparison of a once daily with a twice daily subcutaneous low molecular weight heparin regimen in the treatment of deep vein thrombosis. FRAXODI group. *Thromb Haemost.* 1998;79(5):897-901.

29. Othieno R, Abu Affan M, Okpo E. Home versus in-patient treatment for deep vein thrombosis. *Cochrane Database Syst Rev.* 2007;(3):CD003076.
30. Boccalon H, Elias A, Chalé JJ, Cadène A, Gabriel S. Clinical outcome and cost of hospital vs home treatment of proximal deep vein thrombosis with a low-molecular-weight heparin: the Vascular Midi-Pyrenees study. *Arch Intern Med.* 2000; 160(12):1769-1773.
31. Chong BH, Brighton TA, Baker RI, Thurlow P, Lee CH; ASTH DVT Study Group. Once-daily enoxaparin in the outpatient setting versus unfractionated heparin in hospital for the treatment of symptomatic deep-vein thrombosis. *J Thromb Thrombolysis.* 2005;19(3):173-181.
32. Daskalopoulos ME, Daskalopoulou SS, Tzortzis E, et al. Long-term treatment of deep venous thrombosis with a low molecular weight heparin (tinzaparin): a prospective randomized trial. *Eur J Vasc Endovasc Surg.* 2005;29(6): 638-650.
33. Ramacciotti E, Araújo GR, Lastoria S, et al; CLETRAT Investigators. An open-label, comparative study of the efficacy and safety of once-daily dose of enoxaparin versus unfractionated heparin in the treatment of proximal lower limb deep-vein thrombosis. *Thromb Res.* 2004;114(3):149-153.
34. Bäckman K, Carlsson P, Kentson M, Hansen S, Engquist L, Hallert C. Deep venous thrombosis: a new task for primary health care. A randomised economic study of outpatient and inpatient treatment. *Scand J Prim Health Care.* 2004; 22(1):44-49.
35. O'Brien B, Levine M, Willan A, et al. Economic evaluation of outpatient treatment with low-molecular-weight heparin for proximal vein thrombosis. *Arch Intern Med.* 1999;159(19):2298-2304.
36. Elsharawy M, Elzayat E. Early results of thrombolysis vs anticoagulation in iliofemoral venous thrombosis. A randomised clinical trial. *Eur J Vasc Endovasc Surg.* 2002;24(3): 209-214.
37. Enden T, Kløw NE, Sandvik L, et al; CaVenT study group. Catheter-directed thrombolysis vs. anticoagulant therapy alone in deep vein thrombosis: results of an open randomized, controlled trial reporting on short-term patency. *J Thromb Haemost.* 2009;7(8):1268-1275.
38. Comerota AJ, Throm RC, Mathias SD, Haughton S, Mewissen M. Catheter-directed thrombolysis for iliofemoral deep venous thrombosis improves health-related quality of life. *J Vasc Surg.* 2000;32(1):130-137.
39. Douketis JD, Foster GA, Crowther MA, Prins MH, Ginsberg JS. Clinical risk factors and timing of recurrent venous thromboembolism during the initial 3 months of anticoagulant therapy. *Arch Intern Med.* 2000;160(22): 3431-3436.
40. Kahn SR, Shrier I, Julian JA, et al. Determinants and time course of the postthrombotic syndrome after acute deep venous thrombosis. *Ann Intern Med.* 2008;149(10):698-707.
41. Semba CP, Dake MD. Iliofemoral deep venous thrombosis: aggressive therapy with catheter-directed thrombolysis. *Radiology.* 1994;191(2):487-494.
42. Verhaeghe R, Stockx L, Lacroix H, Vermynen J, Baert AL. Catheter-directed lysis of iliofemoral vein thrombosis with use of rt-PA. *Eur Radiol.* 1997;7(7):996-1001.
43. Bjarnason H, Kruse JR, Asinger DA, et al. Iliofemoral deep venous thrombosis: safety and efficacy outcome during 5 years of catheter-directed thrombolytic therapy. *J Vasc Interv Radiol.* 1997;8(3):405-418.
44. Mewissen MW, Seabrook GR, Meissner MH, Cynamon J, Labropoulos N, Haughton SH. Catheter-directed thrombolysis for lower extremity deep venous thrombosis: report of a national multicenter registry. *Radiology.* 1999;211(1):39-49.
45. AbuRahma AF, Perkins SE, Wulu JT, Ng HK. Iliofemoral deep vein thrombosis: conventional therapy versus lysis and percutaneous transluminal angioplasty and stenting. *Ann Surg.* 2001;233(6):752-760.
46. Kearon C, Kahn SR, Agnelli G, Goldhaber S, Raskob GE, Comerota AJ; American College of Chest Physicians. Antithrombotic therapy for venous thromboembolic disease: American College of Chest Physicians Evidence-Based Clinical Practice Guidelines (8th Edition). *Chest.* 2008; 133(6 suppl):454S-545S.
47. Watson LI, Armon MP. Thrombolysis for acute deep vein thrombosis. *Cochrane Database Syst Rev.* 2004;(4): CD002783.
48. Common HH, Seaman AJ, Rösch J, Porter JM, Dotter CT. Deep vein thrombosis treated with streptokinase or heparin. Follow-up of a randomized study. *Angiology.* 1976; 27(11):645-654.
49. Schulman S, Granqvist S, Juhlin-Dannfelt A, Lockner D. Long-term sequelae of calf vein thrombosis treated with heparin or low-dose streptokinase. *Acta Med Scand.* 1986; 219(4):349-357.
50. Turpie AG, Levine MN, Hirsh J, et al. Tissue plasminogen activator (rt-PA) vs heparin in deep vein thrombosis. Results of a randomized trial. *Chest.* 1990;97(4 suppl):172S-175S.
51. Verhaeghe R, Besse P, Bounameaux H, Marbet GA. Multicenter pilot study of the efficacy and safety of systemic rt-PA administration in the treatment of deep vein thrombosis of the lower extremities and/or pelvis. *Thromb Res.* 1989;55(1):5-11.
52. Browse NL, Thomas ML, Pim HP. Streptokinase and deep vein thrombosis. *BMJ.* 1968;3(5620):717-720.
53. Robertson BR, Nilsson IM, Nylander G. Value of streptokinase and heparin in treatment of acute deep venous thrombosis. A coded investigation. *Acta Chir Scand.* 1968; 134(3):203-208.
54. Kakkar VV, Flanc C, Howe CT, O'Shea M, Flute PT. Treatment of deep vein thrombosis. A trial of heparin, streptokinase, and arvin. *BMJ.* 1969;1(5647):806-810.
55. Tsapogas MJ, Peabody RA, Wu KT, Karmody AM, Devaraj KT, Eckert C. Controlled study of thrombolytic therapy in deep vein thrombosis. *Surgery.* 1973;74(6):973-984.
56. Duckert F, Müller G, Nyman D, et al. Treatment of deep vein thrombosis with streptokinase. *BMJ.* 1975;1(5956): 479-481.
57. Porter JM, Seaman AJ, Common HH, Rösch J, Eidemiller LR, Calhoun AD. Comparison of heparin and streptokinase in the treatment of venous thrombosis. *Am Surg.* 1975;41(9): 511-519.
58. Marder VJ, Soulen RL, Atchatakarn V, et al. Quantitative venographic assessment of deep vein thrombosis in the evaluation of streptokinase and heparin therapy. *J Lab Clin Med.* 1977;89(5):1018-1029.
59. Arnesen H, Heilo A, Jakobsen E, Ly B, Skaga E. A prospective study of streptokinase and heparin in the treatment of deep vein thrombosis. *Acta Med Scand.* 1978;203(6): 457-463.
60. Elliot MS, Immelman EJ, Jeffery P, et al. A comparative randomized trial of heparin versus streptokinase in the treatment of acute proximal venous thrombosis: an interim report of a prospective trial. *Br J Surg.* 1979;66(12):838-843.
61. Watz R, Savidge GF. Rapid thrombolysis and preservation of valvular venous function in high deep vein thrombosis. A comparative study between streptokinase and heparin therapy. *Acta Med Scand.* 1979;205(4):293-298.
62. Kiil J, Carvalho A, Saksø P, Nielsen HO. Urokinase or heparin in the management of patients with deep vein thrombosis? *Acta Chir Scand.* 1981;147(7):529-532.

63. Arnesen H, Høiseith A, Ly B. Streptokinase of heparin in the treatment of deep vein thrombosis. Follow-up results of a prospective study. *Acta Med Scand*. 1982;211(1-2):65-68.
64. Goldhaber SZ, Meyerovitz MF, Green D, et al. Randomized controlled trial of tissue plasminogen activator in proximal deep venous thrombosis. *Am J Med*. 1990;88(3):235-240.
65. Schweizer J, Elix H, Altmann E, Hellner G, Forkmann L. Comparative results of thrombolysis treatment with rt-PA and urokinase: a pilot study. *Vasa*. 1998;27(3):167-171.
66. Schweizer J, Kirch W, Koch R, et al. Short- and long-term results after thrombolytic treatment of deep venous thrombosis. *J Am Coll Cardiol*. 2000;36(4):1336-1343.
67. Plate G, Einarsson E, Ohlin P, Jensen R, Qvarfordt P, Eklöf B. Thrombectomy with temporary arteriovenous fistula: the treatment of choice in acute iliofemoral venous thrombosis. *J Vasc Surg*. 1984;1(6):867-876.
68. Einarsson E, Albrechtsson U, Eklöf B. Thrombectomy and temporary AV-fistula in iliofemoral vein thrombosis. Technical considerations and early results. *Int Angiol*. 1986;5(2):65-72.
69. Einarsson E, Albrechtsson U, Eklöf B, Norgren L. Follow-up evaluation of venous morphologic factors and function after thrombectomy and temporary arteriovenous fistula in thrombosis of iliofemoral vein. *Surg Gynecol Obstet*. 1986;163(2):111-116.
70. Plate G, Akesson H, Einarsson E, Ohlin P, Eklöf B. Long-term results of venous thrombectomy combined with a temporary arterio-venous fistula. *Eur J Vasc Surg*. 1990;4(5):483-489.
71. Neglén P, al-Hassan HK, Endrys J, Nazzal MM, Christenson JT, Eklöf B. Iliofemoral venous thrombectomy followed by percutaneous closure of the temporary arteriovenous fistula. *Surgery*. 1991;110(3):493-499.
72. Plate G, Eklöf B, Norgren L, Ohlin P, Dahlström JA. Venous thrombectomy for iliofemoral vein thrombosis—10-year results of a prospective randomised study. *Eur J Vasc Endovasc Surg*. 1997;14(5):367-374.
73. PREPIC Study Group. Eight-year follow-up of patients with permanent vena cava filters in the prevention of pulmonary embolism: the PREPIC (Prevention du Risque d'Embolie Pulmonaire par Interruption Cave) randomized study. *Circulation*. 2005;112(3):416-422.
74. Mismetti P, Rivron-Guillot K, Quenet S, et al. A prospective long-term study of 220 patients with a retrievable vena cava filter for secondary prevention of venous thromboembolism. *Chest*. 2007;131(1):223-229.
75. Athanasoulis CA, Kaufman JA, Halpern EF, Waltman AC, Geller SC, Fan CM. Inferior vena caval filters: review of a 26-year single-center clinical experience. *Radiology*. 2000;216(1):54-66.
76. Kahn SR, Shrier I, Kearon C. Physical activity in patients with deep venous thrombosis: a systematic review. *Thromb Res*. 2008;122(6):763-773.
77. Aissaoui N, Martins E, Mouly S, Weber S, Meune C. A meta-analysis of bed rest versus early ambulation in the management of pulmonary embolism, deep vein thrombosis, or both. *Int J Cardiol*. 2009;137(1):37-41.
78. Aschwanden M, Labs KH, Engel H, et al. Acute deep vein thrombosis: early mobilization does not increase the frequency of pulmonary embolism. *Thromb Haemost*. 2001;85(1):42-46.
79. Blättler W, Partsch H. Leg compression and ambulation is better than bed rest for the treatment of acute deep venous thrombosis. *Int Angiol*. 2003;22(4):393-400.
80. Jünger M, Diehm C, Störkio H, et al. Mobilization versus immobilization in the treatment of acute proximal deep venous thrombosis: a prospective, randomized, open, multi-centre trial. *Curr Med Res Opin*. 2006;22(3):593-602.
81. Partsch H, Blättler W. Compression and walking versus bed rest in the treatment of proximal deep venous thrombosis with low molecular weight heparin. *J Vasc Surg*. 2000;32(5):861-869.
82. Schellong SM, Schwarz T, Kropp J, Prescher Y, Beuthien-Baumann B, Daniel WG. Bed rest in deep vein thrombosis and the incidence of scintigraphic pulmonary embolism. *Thromb Haemost*. 1999;82(Suppl 1):127-129.
83. Partsch H. Therapy of deep vein thrombosis with low molecular weight heparin, leg compression and immediate ambulation. *Vasa*. 2001;30(3):195-204.
84. Partsch H, Kaulich M, Mayer W. Immediate mobilisation in acute vein thrombosis reduces post-thrombotic syndrome. *Int Angiol*. 2004;23(3):206-212.
85. Trujillo-Santos J, Perea-Milla E, Jiménez-Puente A, et al; RIETE Investigators. Bed rest or ambulation in the initial treatment of patients with acute deep vein thrombosis or pulmonary embolism: findings from the RIETE registry. *Chest*. 2005;127(5):1631-1636.
86. Kearon C, Ginsberg JS, Anderson DR, et al; SOFAST Investigators. Comparison of 1 month with 3 months of anticoagulation for a first episode of venous thromboembolism associated with a transient risk factor. *J Thromb Haemost*. 2004;2(5):743-749.
87. Pinede L, Ninet J, Duhaut P, et al; Investigators of the "Durée Optimale du Traitement AntiVitamines K" (DOTAVK) Study. Comparison of 3 and 6 months of oral anticoagulant therapy after a first episode of proximal deep vein thrombosis or pulmonary embolism and comparison of 6 and 12 weeks of therapy after isolated calf deep vein thrombosis. *Circulation*. 2001;103(20):2453-2460.
88. Schulman S, Rhedin AS, Lindmarker P, et al; Duration of Anticoagulation Trial Study Group. A comparison of six weeks with six months of oral anticoagulant therapy after a first episode of venous thromboembolism. *N Engl J Med*. 1995;332(25):1661-1665.
89. Levine MN, Hirsh J, Gent M, et al. Optimal duration of oral anticoagulant therapy: a randomized trial comparing four weeks with three months of warfarin in patients with proximal deep vein thrombosis. *Thromb Haemost*. 1995;74(2):606-611.
90. Research Committee of the British Thoracic Society. Optimum duration of anticoagulation for deep-vein thrombosis and pulmonary embolism. *Lancet*. 1992;340(8824):873-876.
91. Campbell IA, Bentley DP, Prescott RJ, Routledge PA, Shetty HG, Williamson IJ. Anticoagulation for three versus six months in patients with deep vein thrombosis or pulmonary embolism, or both: randomised trial. *BMJ*. 2007;334(7595):674-680.
92. Agnelli G, Prandoni P, Becattini C, et al; Warfarin Optimal Duration Italian Trial Investigators. Extended oral anticoagulant therapy after a first episode of pulmonary embolism. *Ann Intern Med*. 2003;139(1):19-25.
93. Agnelli G, Prandoni P, Santamaria MG, et al; Warfarin Optimal Duration Italian Trial Investigators. Three months versus one year of oral anticoagulant therapy for idiopathic deep venous thrombosis. *N Engl J Med*. 2001;345(3):165-169.
94. Siragusa S, Malato A, Anastasio R, et al. Residual vein thrombosis to establish duration of anticoagulation after a first episode of deep vein thrombosis: the Duration of Anticoagulation based on Compression UltraSonography (DACUS) study. *Blood*. 2008;112(3):511-515.
95. Palareti G, Cosmi B, Legnani C, et al; PROLONG Investigators. D-dimer testing to determine the duration of anticoagulation therapy. *N Engl J Med*. 2006;355(17):1780-1789.



96. Kearon C, Gent M, Hirsh J, et al. A comparison of three months of anticoagulation with extended anticoagulation for a first episode of idiopathic venous thromboembolism. *N Engl J Med*. 1999;340(12):901-907.
97. Schulman S, Granqvist S, Holmström M, et al; The Duration of Anticoagulation Trial Study Group. The duration of oral anticoagulant therapy after a second episode of venous thromboembolism. *N Engl J Med*. 1997;336(6):393-398.
98. Farraj RS. Anticoagulation period in idiopathic venous thromboembolism. How long is enough? *Saudi Med J*. 2004; 25(7):848-851.
99. Prandoni P, Prins MH, Lensing AW, et al; AESOPUS Investigators. Residual thrombosis on ultrasonography to guide the duration of anticoagulation in patients with deep venous thrombosis: a randomized trial. *Ann Intern Med*. 2009; 150(9):577-585.
100. Ridker PM, Goldhaber SZ, Danielson E, et al; PREVENT Investigators. Long-term, low-intensity warfarin therapy for the prevention of recurrent venous thromboembolism. *N Engl J Med*. 2003;348(15):1425-1434.
101. Kearon C. Natural history of venous thromboembolism. *Circulation*. 2003;107(suppl):I-22-I30.
102. Deitcher SR, Kessler CM, Merli G, Rigas JR, Lyons RM, Fareed J; ONCENOX Investigators. Secondary prevention of venous thromboembolic events in patients with active cancer: enoxaparin alone versus initial enoxaparin followed by warfarin for a 180-day period. *Clin Appl Thromb Hemost*. 2006;12(4):389-396.
103. Hull RD, Pineo GF, Brant RF, et al; LITE Trial Investigators. Self-managed long-term low-molecular-weight heparin therapy: the balance of benefits and harms. *Am J Med*. 2007; 120(1):72-82.
104. Hull RD, Pineo GF, Brant R, et al. Home therapy of venous thrombosis with long-term LMWH versus usual care: patient satisfaction and post-thrombotic syndrome. *Am J Med*. 2009;122(8):762-769.
105. Lee AY, Levine MN, Baker RI, et al; Randomized Comparison of Low-Molecular-Weight Heparin versus Oral Anticoagulant Therapy for the Prevention of Recurrent Venous Thromboembolism in Patients with Cancer (CLOT) Investigators. Low-molecular-weight heparin versus a coumarin for the prevention of recurrent venous thromboembolism in patients with cancer. *N Engl J Med*. 2003;349(2):146-153.
106. Lopaciuk S, Bielska-Falda H, Noszczyk W, et al. Low molecular weight heparin versus acenocoumarol in the secondary prophylaxis of deep vein thrombosis. *Thromb Haemost*. 1999;81(1):26-31.
107. López-Beret P, Orgaz A, Fontcuberta J, et al. Low molecular weight heparin versus oral anticoagulants in the long-term treatment of deep venous thrombosis. *J Vasc Surg*. 2001;33(1):77-90.
108. Meyer G, Marjanovic Z, Valcke J, et al. Comparison of low-molecular-weight heparin and warfarin for the secondary prevention of venous thromboembolism in patients with cancer: a randomized controlled study. *Arch Intern Med*. 2002;162(15):1729-1735.
109. Romera A, Cairols MA, Vila-Coll R, et al. A randomised open-label trial comparing long-term sub-cutaneous low-molecular-weight heparin compared with oral-anticoagulant therapy in the treatment of deep venous thrombosis. *Eur J Vasc Endovasc Surg*. 2009;37(3):349-356.
110. Hull RD, Pineo GF, Brant RF, et al; LITE Trial Investigators. Long-term low-molecular-weight heparin versus usual care in proximal-vein thrombosis patients with cancer. *Am J Med*. 2006;119(12):1062-1072.
111. Pini M, Aiello S, Manotti C, et al. Low molecular weight heparin versus warfarin in the prevention of recurrences after deep vein thrombosis. *Thromb Haemost*. 1994;72(2): 191-197.
112. Das SK, Cohen AT, Edmondson RA, Melissari E, Kakkar VV. Low-molecular-weight heparin versus warfarin for prevention of recurrent venous thromboembolism: a randomized trial. *World J Surg*. 1996;20(5):521-526.
113. Gonzalez-Fajardo JA, Arriba E, Castrodeza J, et al. Venographic comparison of subcutaneous low-molecular weight heparin with oral anticoagulant therapy in the long-term treatment of deep venous thrombosis. *J Vasc Surg*. 1999;30(2):283-292.
114. Veiga F, Escribá A, Maluenda MP, et al. Low molecular weight heparin (enoxaparin) versus oral anticoagulant therapy (acenocoumarol) in the long-term treatment of deep venous thrombosis in the elderly: a randomized trial. *Thromb Haemost*. 2000;84(4):559-564.
115. Kakkar VV, Gebbska M, Kadziola Z, Saba N, Carrasco P; Bemiparin Investigators. Low-molecular-weight heparin in the acute and long-term treatment of deep vein thrombosis. *Thromb Haemost*. 2003;89(4):674-680.
116. Prandoni P, Lensing AW, Piccioli A, et al. Recurrent venous thromboembolism and bleeding complications during anticoagulant treatment in patients with cancer and venous thrombosis. *Blood*. 2002;100(10):3484-3488.
117. Beyth RJ, Cohen AM, Landefeld CS. Long-term outcomes of deep-vein thrombosis. *Arch Intern Med*. 1995;155(10): 1031-1037.
118. Kahn SR, Ginsberg JS. Relationship between deep venous thrombosis and the postthrombotic syndrome. *Arch Intern Med*. 2004;164(1):17-26.
119. Bauersachs R, Berkowitz SD, Brenner B, et al; EINSTEIN Investigators. Oral rivaroxaban for symptomatic venous thromboembolism. *N Engl J Med*. 2010;363(26):2499-2510.
120. Prandoni P, Lensing AW, Prins MH, et al. Below-knee elastic compression stockings to prevent the post-thrombotic syndrome: a randomized, controlled trial. *Ann Intern Med*. 2004;141(4):249-256.
121. van Dongen CJ, Prandoni P, Frulla M, Marchiori A, Prins MH, Hutten BA. Relation between quality of anticoagulant treatment and the development of the postthrombotic syndrome. *J Thromb Haemost*. 2005;3(5):939-942.
122. Schulman S, Kearon C, Kakkar AK, et al; RE-COVER Study Group. Dabigatran versus warfarin in the treatment of acute venous thromboembolism. *N Engl J Med*. 2009; 361(24):2342-2352.
123. Kolbach DN, Sandbrink MW, Neumann HA, Prins MH. Compression therapy for treating stage I and II (Widmer) post-thrombotic syndrome. *Cochrane Database Syst Rev*. 2003;(4):CD004177.
124. Ginsberg JS, Hirsh J, Julian J, et al. Prevention and treatment of postphlebotic syndrome: results of a 3-part study. *Arch Intern Med*. 2001;161(17):2105-2109.
125. Belcaro G, Laurora G, Cesarone MR, De Sanctis MT. Prophylaxis of recurrent deep venous thrombosis. A randomized, prospective study using indobufen and graduated elastic compression stockings. *Angiology*. 1993;44(9):695-699.
126. Arpaia G, Cimminiello C, Mastrogiacomo O, de Gaudenzi E. Efficacy of elastic compression stockings used early or after resolution of the edema on recanalization after deep venous thrombosis: the COM.PRE Trial. *Blood Coagul Fibrinolysis*. 2007;18(2):131-137.
127. Brandjes DP, Büller HR, Heijboer H, et al. Randomised trial of effect of compression stockings in patients with symptomatic proximal-vein thrombosis. *Lancet*. 1997;349(9054): 759-762.
128. Heit JA, Mohr DN, Silverstein MD, Petterson TM, O'Fallon WM, Melton LJ III. Predictors of recurrence after

- deep vein thrombosis and pulmonary embolism: a population-based cohort study. *Arch Intern Med.* 2000;160(6):761-768.
129. Prandoni P, Noventa F, Ghirarduzzi A, et al. The risk of recurrent venous thromboembolism after discontinuing anticoagulation in patients with acute proximal deep vein thrombosis or pulmonary embolism. A prospective cohort study in 1,626 patients. *Haematologica.* 2007;92(2):199-205.
  130. Aschwanden M, Jeanneret C, Koller MT, Thalhammer C, Bucher HC, Jaeger KA. Effect of prolonged treatment with compression stockings to prevent post-thrombotic sequelae: a randomized controlled trial. *J Vasc Surg.* 2008;47(5):1015-1021.
  131. Frulla M, Marchiori A, Sartor D, et al. Elastic stockings, hydroxyethylrutosides or both for the treatment of post-thrombotic syndrome. *Thromb Haemost.* 2005;93(1):183-185.
  132. Ginsberg JS, Magier D, Mackinnon B, Gent M, Hirsh J. Intermittent compression units for severe post-phlebotic syndrome: a randomized crossover study. *CMAJ.* 1999;160(9):1303-1306.
  133. O'Donnell MJ, McRae S, Kahn SR, et al. Evaluation of a venous-return assist device to treat severe post-thrombotic syndrome (VENOPTS). A randomized controlled trial. *Thromb Haemost.* 2008;99(3):623-629.
  134. de Jongste AB, Jonker JJ, Huisman MV, ten Cate JW, Azar AJ. A double blind three center clinical trial on the short-term efficacy of 0-(beta-hydroxyethyl)-rutosides in patients with post-thrombotic syndrome. *Thromb Haemost.* 1989;62(3):826-829.
  135. Monreal M, Callejas JM, Martorell A, et al. A prospective study of the long-term efficacy of two different venoactive drugs in patients with post-thrombotic syndrome. *Phlebology.* 1994;9(1):37-40.
  136. Büller HR, Davidson BL, Decousus H, et al; Matisse Investigators. Subcutaneous fondaparinux versus intravenous unfractionated heparin in the initial treatment of pulmonary embolism. *N Engl J Med.* 2003;349(18):1695-1702.
  137. Otero R, Uresandi F, Jiménez D, et al. Home treatment in pulmonary embolism. *Thromb Res.* 2010;126(1):e1-e5.
  138. Aujesky D, Roy PM, Verschuren F, et al. Outpatient versus inpatient treatment for patients with acute pulmonary embolism: an international, open-label, randomised, non-inferiority trial. *Lancet.* 2011;378(9785):41-48.
  139. Aujesky D, Obrosky DS, Stone RA, et al. Derivation and validation of a prognostic model for pulmonary embolism. *Am J Respir Crit Care Med.* 2005;172(8):1041-1046.
  140. Uresandi F, Otero R, Cayuela A, et al. [A clinical prediction rule for identifying short-term risk of adverse events in patients with pulmonary thromboembolism]. *Arch Bronconeumol.* 2007;43(11):617-622.
  141. Urokinase Pulmonary Embolism Trial. A national co-operative study. *Circulation.* 1973;47(Suppl II):1.
  142. Dalla-Volta S, Palla A, Santolicandro A, et al. PAIMS 2: alteplase combined with heparin versus heparin in the treatment of acute pulmonary embolism. Plasminogen activator Italian multicenter study 2. *J Am Coll Cardiol.* 1992;20(3):520-526.
  143. Dotter CT, Seamon AJ, Rosch J, et al. Streptokinase and heparin in the treatment of pulmonary embolism: a randomized comparison. *Vasc Surg.* 1979;13(1):42-52.
  144. PIOPED Investigators. Tissue plasminogen activator for the treatment of acute pulmonary embolism. A collaborative study by the PIOPED Investigators. *Chest.* 1990;97(3):528-533.
  145. Jerjes-Sanchez C, Ramírez-Rivera A, Arriaga-Nava R, et al; de Lourdes García M. Streptokinase and heparin versus heparin alone in massive pulmonary embolism: a randomized controlled trial. *J Thromb Thrombolysis.* 1995;2(3):227-229.
  146. Ly B, Arnesen H, Eie H, Hol R. A controlled clinical trial of streptokinase and heparin in the treatment of major pulmonary embolism. *Acta Med Scand.* 1978;203(6):465-470.
  147. Marini C, Di Ricco G, Rossi G, Rindi M, Palla R, Giuntini C. Fibrinolytic effects of urokinase and heparin in acute pulmonary embolism: a randomized clinical trial. *Respiration.* 1988;54(3):162-173.
  148. Tibbutt DA, Davies JA, Anderson JA, et al. Comparison by controlled clinical trial of streptokinase and heparin in treatment of life-threatening pulmonary embolism. *BMJ.* 1974;1(5904):343-347.
  149. Urokinase Pulmonary Embolism Trial Study Group. Urokinase pulmonary embolism trial: phase I results. *JAMA.* 1970;214(12):2163-2172.
  150. Dong B, Jirong Y, Wang Q, et al. Thrombolytic treatment for pulmonary embolism. *Cochrane Database Syst Rev.* 2006;2:CD004437.
  151. Wan S, Quinlan DJ, Agnelli G, Eikelboom JW. Thrombolysis compared with heparin for the initial treatment of pulmonary embolism: a meta-analysis of the randomized controlled trials. *Circulation.* 2004;110(6):744-749.
  152. Agnelli G, Becattini C, Kirschstein T. Thrombolysis vs heparin in the treatment of pulmonary embolism: a clinical outcome-based meta-analysis. *Arch Intern Med.* 2002;162(22):2537-2541.
  153. Becattini C, Agnelli G, Salvi A, et al; TIPES Study Group. Bolus tenecteplase for right ventricle dysfunction in hemodynamically stable patients with pulmonary embolism. *Thromb Res.* 2010;125(3):e82-e86.
  154. Fasullo S, Scalzo S, Maringhini G, et al. Six-month echocardiographic study in patients with submassive pulmonary embolism and right ventricle dysfunction: comparison of thrombolysis with heparin. *Am J Med Sci.* 2011;341(1):33-39.
  155. Jiménez D, Aujesky D, Moores L, et al; RIETE Investigators. Simplification of the pulmonary embolism severity index for prognostication in patients with acute symptomatic pulmonary embolism. *Arch Intern Med.* 2010;170(15):1383-1389.
  156. Wood KE. Major pulmonary embolism: review of a pathophysiologic approach to the golden hour of hemodynamically significant pulmonary embolism. *Chest.* 2002;121(3):877-905.
  157. Ruiz-Giménez N, Suárez C, González R, et al; RIETE Investigators. Predictive variables for major bleeding events in patients presenting with documented acute venous thromboembolism. Findings from the RIETE Registry. *Thromb Haemost.* 2008;100(1):26-31.
  158. Goldhaber SZ, Haire WD, Feldstein ML, et al. Alteplase versus heparin in acute pulmonary embolism: randomised trial assessing right-ventricular function and pulmonary perfusion. *Lancet.* 1993;341(8844):507-511.
  159. Konstantinides S, Geibel A, Heusel G, Heinrich F, Kasper W; Management Strategies and Prognosis of Pulmonary Embolism-3 Trial Investigators. Heparin plus alteplase compared with heparin alone in patients with submassive pulmonary embolism. *N Engl J Med.* 2002;347(15):1143-1150.
  160. Levine M, Hirsh J, Weitz J, et al. A randomized trial of a single bolus dosage regimen of recombinant tissue plasminogen activator in patients with acute pulmonary embolism. *Chest.* 1990;98(6):1473-1479.
  161. Decousus H, Prandoni P, Mismetti P, et al; CALISTO Study Group. Fondaparinux for the treatment of superficial-vein thrombosis in the legs. *N Engl J Med.* 2010;363(13):1222-1232.

162. Decousus H, Quéré I, Presles E, et al: POST (Prospective Observational Superficial Thrombophlebitis) Study Group. Superficial venous thrombosis and venous thromboembolism: a large, prospective epidemiologic study. *Ann Intern Med.* 2010;152(4):218-224.
163. Superficial Thrombophlebitis Treated By Enoxaparin Study Group. A pilot randomized double-blind comparison of a low-molecular-weight heparin, a nonsteroidal anti-inflammatory agent, and placebo in the treatment of superficial vein thrombosis. *Arch Intern Med.* 2003;163(14):1657-1663.
164. Titon JP, Auger D, Grange P, et al. [Therapeutic management of superficial venous thrombosis with calcium nadroparin. Dosage testing and comparison with a non-steroidal anti-inflammatory agent]. *Ann Cardiol Angeiol (Paris).* 1994;43(3):160-166.
165. Prandoni P, Tormene D, Pesavento R; Vesalio Investigators Group. High vs. low doses of low-molecular-weight heparin for the treatment of superficial vein thrombosis of the legs: a double-blind, randomized trial. *J Thromb Haemost.* 2005;3(6):1152-1157.
166. Marchiori A, Verlato F, Sabbion P, et al. High versus low doses of unfractionated heparin for the treatment of superficial thrombophlebitis of the leg. A prospective, controlled, randomized study. *Haematologica.* 2002;87(5):523-527.
167. Belcaro G, Nicolaidis AN, Errichi BM, et al. Superficial thrombophlebitis of the legs: a randomized, controlled, follow-up study. *Angiology.* 1999;50(7):523-529.
168. Lozano FS, Almazan A. Low-molecular-weight heparin versus saphenofemoral disconnection for the treatment of above-knee greater saphenous thrombophlebitis: a prospective study. *Vasc Endovascular Surg.* 2003;37(6):415-420.
169. Sullivan V, Denk PM, Sonnad SS, Eagleton MJ, Wakefield TW. Ligation versus anticoagulation: treatment of above-knee superficial thrombophlebitis not involving the deep venous system. *J Am Coll Surg.* 2001;193(5):556-562.
170. Górski G, Szopiński P, Michalak J, et al. Liposomal heparin spray: a new formula in adjunctive treatment of superficial venous thrombosis. *Angiology.* 2005;56(1):9-17.
171. Andreozzi GM, Signorelli S, Di Pino L, et al. Tolerability and clinical efficacy of desmin in the treatment of superficial thrombovaricophlebitis. *Angiology.* 1996;47(9):887-894.
172. Savage KJ, Wells PS, Schulz V, et al. Outpatient use of low molecular weight heparin (Dalteparin) for the treatment of deep vein thrombosis of the upper extremity. *Thromb Haemost.* 1999;82(3):1008-1010.
173. Karabay O, Yetkin U, Onol H. Upper extremity deep vein thrombosis: clinical and treatment characteristics. *J Int Med Res.* 2004;32(4):429-435.
174. Kovacs MJ, Kahn SR, Rodger M, et al. A pilot study of central venous catheter survival in cancer patients using low molecular weight heparin (dalteparin) and warfarin without catheter removal for the treatment of upper extremity deep vein thrombosis (the catheter study). *J Thromb Haemost.* 2007;5(8):1650-1653.
175. Horne MK III, Mayo DJ, Cannon RO III, Chen CC, Shawker TH, Chang R. Intraclot recombinant tissue plasminogen activator in the treatment of deep venous thrombosis of the lower and upper extremities. *Am J Med.* 2000; 108(3):251-255.
176. Lee JT, Karwowski JK, Harris EJ, Haukoos JS, Olcott C IV. Long-term thrombotic recurrence after nonoperative management of Paget-Schroetter syndrome. *J Vasc Surg.* 2006; 43(6):1236-1243.
177. Martinelli I, Battaglioli T, Bucciarelli P, Passamonti SM, Mannucci PM. Risk factors and recurrence rate of primary deep vein thrombosis of the upper extremities. *Circulation.* 2004;110(5):566-570.
178. Prandoni P, Bernardi E, Marchiori A, et al. The long term clinical course of acute deep vein thrombosis of the arm: prospective cohort study. *BMJ.* 2004;329(7464): 484-485.
